# Supplementary material for: EP-Pred: A Machine Learning Tool for Bioprospecting Promiscuous Ester Hydrolases
Source: Biomolecules. 2022 Oct 21;12(10):1529. doi: 10.3390/biom12101529 (PMC9599548; doi:10.3390/biom12101529)
Supplement: Supplementary file 1 [file biomolecules-12-01529-s001.zip › sumplementary_S3_S4_S5_S6_S7.xlsx]

## Sheet: Table_S3 Sitemap descriptors
	hydrophobic	enclosure/exposure	enclosure	exposure	NCBI Reference Sequence
sid|12870	2.386	2.6164	0.989	0.378	PHR82761.1		The sequences were ordered based on the hydrophobic scores and enclosure/exposure scores as well.
sid|171015	1.58	1.78245	0.975	0.547	AMK51992.1		Those that had the top scores in both hydrophobic and enclosure/exposure were chosen to be tested
sid|171057	1.043	1.73118	0.966	0.558	WP_066160068.1
sid|171087	1.115	1.92203	0.986	0.513	ART35915.1
sid|171139	2.391	2.75487	0.989	0.359	WP_059541090.1
sid|171306	1.953	2.2814	0.981	0.43	WP_059536210.1
sid|171511	1.568	1.97955	0.968	0.489	WP_071333398.1
sid|171705	1.913	2.14597	0.985	0.459	WP_096500752.1
sid|172035	0.424	2.06526	0.981	0.475	WP_007152861.1
sid|172354	1.281	1.55008	0.975	0.629	WP_085043544.1
sid|172480	1.732	2.03942	0.983	0.482	WP_024774209.1
sid|172488	0.447	1.98783	0.98	0.493	PLY11543.1
sid|172548	1.236	2.0766	0.976	0.47	KXJ46484.1
sid|172751	0.664	1.91033	0.98	0.513	WP_059464931.1
sid|172893	1.911	2.40732	0.987	0.41	WP_038200842.1
sid|173223	1.826	1.91749	0.976	0.509	PKO84122.1
sid|173353	1.848	1.77518	0.987	0.556	ODU62785.1
sid|173606	1.218	1.875	0.975	0.52	WP_035489636.1
sid|174159	1.488	2.0352	0.983	0.483	WP_011803687.1
sid|174337	2.261	2.09766	0.988	0.471	BAH89650.1
sid|174531	2.261	2.09766	0.988	0.471	WP_047350376.1
sid|174539	1.664	1.79266	0.977	0.545	WP_020161852.1
sid|174843	1.44	1.85633	0.982	0.529	WP_014160661.1
sid|174901	0.172	1.53956	0.973	0.632	WP_096445991.1
sid|175027	2.187	2.4675	0.987	0.4	WP_083447098.1
sid|175180	2.841	2.03711	0.988	0.485	ART37310.1
sid|175537	1.629	2.22045	0.977	0.44	PCI66289.1
sid|175582	2.145	2.06356	0.974	0.472	WP_060040128.1
sid|175965	0.907	2.17035	0.981	0.452	WP_066266841.1
sid|176070	2.263	2.34606	0.983	0.419	WP_069226497.1
sid|176238	1.482	1.88588	0.975	0.517	WP_059509898.1
sid|176271	2.444	2.05462	0.978	0.476	WP_059685121.1
sid|176877	0.477	1.75401	0.984	0.561	WP_066786840.1
sid|177142	0.185	1.65882	0.987	0.595	WP_086926288.1
sid|177495	0.951	2.12095	0.982	0.463	WP_038710735.1
sid|178198	2.528	2.41626	0.981	0.406	AJP48854.1
sid|178810	1.841	2.23409	0.983	0.44	ART35835.1
sid|179581	2.032	1.74735	0.989	0.566	AAC03446.1
sid|179921	1.956	1.98182	0.981	0.495	OUR85636.1
sid|180124	0.901	1.87861	0.975	0.519	WP_019529171.1
sid|180273	2.546	2.7493	0.987	0.359	WP_014900537.1
sid|180409	0.371	1.93151	0.987	0.511	WP_099617941.1
sid|180953	1.042	2.14069	0.989	0.462	OEZ29108.1
sid|181002	2.15	2.09534	0.989	0.472	WP_073023515.1
sid|181104	2.417	2.33176	0.991	0.425	ART39858.1
sid|181137	1.5	2.01646	0.98	0.486	WP_044845453.1
sid|181382	1.674	1.962	0.981	0.5	WP_011516071.1
sid|181383	4.256	2.23982	0.99	0.442	WP_055422979.1
sid|181416	2.692	2.88824	0.982	0.34	WP_101198885.1
sid|181580	0.698	1.55433	0.987	0.635	WP_058698698.1
sid|181817	0.579	1.88952	0.992	0.525	WP_068636205.1
sid|182205	1.722	2.38443	0.98	0.411	WP_007231652.1
sid|182621	2.502	2.44059	0.986	0.404	WP_042877612.1
sid|182664	2.154	2.39563	0.987	0.412	WP_059818367.1
sid|182795	2.924	2.25513	0.99	0.439	WP_026140314.1
sid|183161	1.459	2.38592	0.983	0.412	KJS34782.1
sid|183201	2.296	2.40244	0.985	0.41	WP_089515094.1
sid|183587	1.732	1.85255	0.98	0.529	BAB62053.1
sid|183641	2.779	1.982	0.991	0.5	WP_059593647.1
sid|183797	1.477	1.83647	0.977	0.532	WP_046485877.1
sid|183912	1.046	1.78755	0.976	0.546	WP_096696846.1
sid|183970	0.258	1.58958	0.976	0.614	WP_086911023.1
sid|184097	0.345	1.61028	0.971	0.603	WP_079366525.1
sid|184292	1.516	1.50995	0.986	0.653	WP_014475143.1
sid|184628	0.835	1.86767	0.988	0.529	GAC18646.1
sid|184664	1.17	2.05462	0.978	0.476	WP_060246476.1
sid|185008	2.916	2.13508	0.98	0.459	ART39330.1
sid|185353	1.434	1.85199	0.976	0.527	WP_059692728.1
sid|185465	1.353	1.86312	0.98	0.526	WP_015005325.1
sid|19251	1.859	2.48111	0.985	0.397	WP_099419233.1
sid|40	0.43	2.05428	0.984	0.479	2D0D_A
sid|7928	0.965	2	0.986	0.493	WP_042301713.1
sid|8104	1.139	2.76816	0.991	0.358	WP_020394561.1

## Sheet: Table_S4 Activity assay
		Specific activity (U g-1)
	Substrate	WP_101198885.1	WP_069226497.1	AJP48854.1	WP_042877612.1	WP_059541090.1	ART39858.1	WP_089515094.1	WP_026140314.1	PHR82761.1	WP_014900537.1
meta-CLEAVAGE COMPOUNDS	2-Hydroxy-6-oxo-6-phenylhexa-2,4-dienoate (HOPHD)	23242.6	22802.8	325.287	683.647	479.221	477.129	369.073	560.58	518.472	401.924
	2-Hydroxy-6-oxohepta-2,4-dienoate (HOHD)	8611.8	8925.58	89036	90254.1	89255.6	89255.6	89255.6	89663	89663	89255.6
Ester compounds	1-Napthyl acetate	5229.7	5383.39	4009.29	5146.08	5699.79	4617.24	4829.68	4619.5	5342.71	833.724
	1-Naphthyl butyrate	3000.19	4952.85	1015.88	0	5081.67	0	0	0	3314.33	28.4764
	Glyceryl triacetate	5559.67	3941.49	3545.98	4194.61	2682.65	3851.09	2569.65	3527.9	5564.19	3.37749
	Glyceryl tripropionate	2674.74	1644.17	4983.36	5121.22	6201.52	4779.96	3776.51	1566.2	5654.59	325.67
	Glyceryl tributyrate	1819.57	630.957	1702.93	0	2848.77	1280.31	1235.11	0	2426.14	93.5652
	Glyceryl trioctanoate	1152.61	276.097	0	0	6154.06	0	980.852	0	1830.62	0
	Methyl 2-bromobutyrate	0	0	0	0	0	0	0	0	1522.13	0.0188336
	Hexyl acetate	0	914.181	0	0	1124.36	0	0	0	1078.03	0
	Octyl acetate	4482.77	5775.5	0	2984.37	4579.95	2453.26	2724.46	1431.73	5169.81	3.17346
	Dodecanoyl acetate	1193.29	5573.23	0	0	2232.91	0	0	1243.02	1534.56	0
	Pentadecyl acetate	0	4972.06	0	0	0	0	0	0	0	0
	Ethyl propionate	1770.73	0	1128.88	0	1117.58	3147.09	0	0	1314.21	0
	Ethyl butyrate	2670.22	1203.46	1187.64	0	1232.85	4112.12	0	0	1610.27	0
	Ethyl hexanoate	2395.63	0	0	0	0	0	0	0	0	0.359407
	Ethyl octanoate	0	1620.44	0	0	0	0	0	0	0	0
	Ethyl decanoate	0	3834.14	0	0	1589.93	1024.92	1117.58	0	0	0
	Ethyl dodecanoate	0	2846.5	0	0	1404.61	1137.92	0	0	0	0.043945
	Ethyl myristate	0	1356.02	0	0	1177.47	1511.96	0	0	0	0
	Ethyl benzoate	0	1410.26	0	0	946.952	1952.66	2101.83	0	1030.57	0
	(1R)-Menthyl acetate	0	1680.33	0	0	1748.13	0	0	0	0	0
	(1S)-Menthyl acetate	0	1674.68	0	0	3654.46	0	0	0	0	0
	N-Benzyl-(S)-proline ethyl ester	0	0	0	0	0	1163.91	1229.46	0	0	0
	N-Benzyl-(R)-proline ethyl ester	0	0	0	0	0	1218.15	1276.92	0	1073.51	0
	Methyl (R)-mandelate	3030.7	1193.29	808	2230.65	0	0	0	2578.69	3577.62	3.66784
	Methyl (S)-mandelate	4172.01	928.871	958.252	3254.44	0	0	0	3812.67	4294.05	212.217
	Ethyl (R)-4-chloro-3-hydroxybutyrate	3426.2	2422.75	2027.24	3252.18	1812.54	1360.54	891	4043.19	4126.81	3.78555
	Ethyl (S)-4-chloro-3-hydroxybutyrate	1883.73	5599.22	1644.17	2263.42	3524.51	2573.04	2127.82	1518	2500.72	3.74945
	Ethyl (R)-Lactate	978.592	1909.72	304	540	2400.15	0	0	421	1141.31	0.838094
	Ethyl (S)-lactate	2568.52	4604.81	378.679	3009.23	5106.53	0	0	1316.47	4123.42	3.51717
	Methyl (S)-3-hydroxybutyrate	1296.13	3254.44	0	1033.96	905.141	0	1836.27	0	2451	1.98851
	Methyl (R)-3-hydroxybutyrate	1412.43	5396.95	0	1527.63	1733.44	0	1692.96	0	1828.36	0.342143
	(1R)-Neomenthyl acetate	0	1031.7	0	0	1097.24	0	0	0	0	0
	(1S)-Neomenthyl acetate	0	982.841	0	0	1236.24	0	0	0	0	0
	Propylparaben	0	2926.74	0	0	1227.2	0	2043.07	1068.99	0	0
	Butylparaben	0	5869.29	0	0	0	1566.2	2054.37	1111.93	0	0
	Methyl 3-hydroxybenzoate	0	2256.64	0	0	0	2014.81	1942.49	1124.36	943.562	0
	Methyl 2-hydroxybenzoate	0	1167.3	0	0	0	1917.63	1908.59	939.042	907.401	0
	Phthalic acid diethyl ester	0	0	0	0	1039.61	1747	1814.8	971.812	0	0
	Methyl (R)-3-hydroxyvalerate	2319.92	5841.04	1705.19	2238.56	3458.97	995.542	2135.8	2107.48	4640.97	3.85303
	Methyl (S)-3-hydroxyvalerate	4411.57	2562.87	1979.78	4890.7	3518.94	2122.17	2558.35	4829.68	5179.98	3.6286
	Benzyl (R)-2-hydroxy-3-phenylpropionate	0	6467.07	1653.21	0	5843.3	3373.09	2584.34	1601.23	1806.89	2.90194
	Benzylparaben	0	5384.52	0	0	0	0	0	0	920.961	0
	Methyl benzoate	0	1508.57	1006.84	1232.85	0	0	0	0	1761.69	0.610521
	Methyl butyrate	0	0	925.481	0	0	0	0	0	1165.04	0
	Methyl decanoate	0	4237.55	0	0	0	0	0	0	0	0
	Methyl oleate	0	1508.57	0	0	0	0	0	0	0	0
	Methyl hexanoate	1437.38	0	0	0	1306.3	0	0	0	2501.85	0.0502228
	Methyl octanoate	0	2082.62	0	0	0	1411.39	1065.6	0	0	0
	Methyl dodecanoate	0	3084.94	0	0	1089.33	0	0	0	0	0
	Methyl myristate	0	0	0	0	0	1088.2	0	1422.69	0	0
	Propyl propionate	0	0	0	0	0	0	0	0	1205.72	0
	Propyl butyrate	0	0	0	0	1127.75	0	0	0	1548.12	0
	Propyl hexanoate	1191.03	1808.02	0	0	965.032	0	0	1521	1909.72	0
	Phenylethyl cinnamate	0	3092.85	0	0	945.822	0	0	0	1291.61	0
	Isobutyl cinnamate	0	5495.26	0	0	1971.87	0	0	0	905.141	0.111432
	Methyl cinnamate	1457.72	6371.02	0	1337.94	1552.64	2165.11	2300.71	2149.29	3127.88	0
	Methyl ferulate	1193.29	4879.4	0	1211.37	1023.79	1701.8	1014.75	1462.24	2836.33	0.238558
	Vinyl acetate	1735.7	2501.85	0	1796.72	1023.79	2639.71	2516.54	2185.45	3936.97	0.720384
	Vinyl propionate	0	1075.77	1140.18	0	0	2267.94	1844.18	0	3784.42	757.109
	Vinyl butyrate	0	1024.92	1752.65	0	0	2219.35	1643.04	0	2805.82	135.828
	Vinyl laurate	0	0	0	0	0	1396.7	0	0	0	0
	Vinyl myristate	0	0	0	0	0	0	0	0	0	0
	Vinyl palmitate	0	0	0	0	0	0	0	0	0	0.139682
	Vinyl oleate	0	0	0	0	0	0	0	0	0	0.00941678
	Vinyl benzoate	1113.06	3836.4	0	1558.29	3230.71	1635.13	3016.01	0	1504.05	4.16536
	Vinyl crotonate	1184.25	0	0	0	1145.83	0	0	1019.27	2865.72	0.29192
	Vinyl acrylate	0	0	0	0	1130.01	0	0	0	2253.25	0.102015
	Geranyl acetate	3331.28	4235.29	0	2275.85	2926.74	1163.91	0	1672.42	3742.61	6.78008
	3-Methyl-3-buten-1-yl acetate	0	0	0	0	1655.47	0	0	1101.76	1158.26	0.150669
	Ethyl 2-ethylacetoacetate	1644.17	0	0	1506.31	1004.58	1327.77	1440.77	3486.09	3332.41	35.4824
	Ethyl 2-methylacetoacetate	4972.06	971.812	1536.82	4739.28	1308.56	1181.99	1487.1	4043.19	4639.84	3.73689
	Ethyl 3-oxohexanoate	5396.95	5808.27	3530.16	5417.29	3559.54	2630.67	3740.35	5937.09	5150.6	212.443
	Ethyl acetoacetate	5442.15	5399.21	2063.41	4648.88	2829.55	1776.38	3884.99	5313.33	5288.47	78.423
	Ethyl propionylacetate	5728.04	6430.91	4127.94	5215.01	2604.68	2706.38	3565.19	5291.86	5422.94	307.59
	ϒ-Valerolactone	2874.76	2076.97	1256.58	1884.86	0	0	0	0	2797.91	2.4107
	Methyl glycolate	1037.35	2804.69	0	0	0	0	0	0	0	3.69609
	D-Pantolactone	0	1333.42	0	0	0	0	0	0	0	0
	L-Pantolactone	1241.89	0	0	0	0	0	0	0	0	0
	(1R)-Dimenthyl succinate	983.112	2235.17	0	0	0	0	0	0	0	0
	Ethyl 2-chlorobenzoate	0	0	0	0	1446.42	2316.53	0	0	0	0
	Cyclohexyl butyrate	0	1245.28	0	0	1525.52	985.372	0	0	1017.01	0.596396
	n-Pentyl benzoate	0	1350.37	0	0	1137.92	0	0	0	0	0
	Methyl (R)-Lactate	1375.23	1351.89	0	1036.22	0	0	0	1461.11	1363.93	3.82635
	Methyl (S)-Lactate	2091.66	2534.62	0	1725.53	0	0	0	2369.64	1994.47	15.8202
	Propyl acetate	2202.4	1700.67	0	1424.95	1343.59	1714.23	0	0	3766.34	1.15356
	Butyl acetate	1992.21	1178.6	0	2541.4	1002.32	0	0	0	4385.58	1.06724
	Phenyl acetate	5868.16	5723.52	4616.11	5725.78	3917.76	5474.92	2948.21	5630.86	5497.52	1271.04
	Phenyl propionate	6151.8	5720.13	4617.24	6047.83	3462.36	5584.53	4621.76	4938.16	5921.27	3.96917
	Glucose pentaacetate	1040.74	3985.56	0	0	3590.05	0	0	0	0	1.01
	TOTAL ESTERS CONVERTED	45	68	27	32	57	42	36	36	59	49

## Sheet: Sequences and ID
	ID	NCBI Reference Sequence	Sequence	Full description	Source
sid|181416	mCPHPsp	WP_101198885.1	MTVIKNPEIGQIINVKGVKTNVHDIGSGPPVMLIHGSGPGVTAWANWRLAMPELAKSHRVIAPDMLGFGFTARPANNLCNLERWISHTIDLLDELGIERIDLIGNSFGGGIALALAIRFPHRVRSLVLMGSVGVPFKLTPGLNAVWGYEPSLQAMKGLLDIFAYDRNLVTNELAELRYQASIRPGFQEAFSAMFPAPRQRWVDALESKEHDIRALSHDTLILHGREDEIIPLQTSQTLFEWLPKAQLHMFGHCGHWTQIEHATRFSKLVVDFLAEDETN	sid|181416|pid|181416|hfid|40|sfid|5|gb|WP_101198885.1|taxonID|2058332|Paraglaciecolasp.MB-3u-78-AD*12	NCBI database (Nucleic Acids Res. 2016 Jan 4;44(D1):D733-45)
sid|176070	mCPHBd1	WP_069226497.1	MSANPELGRRIVAGGLDTNYHDLGDGPPVLLIHGSGPGVTAYANWRLTMPALAGQFRVIAPDMAGFGETERPRDYVYSMDHWVDHALGLLDALGVERAHVIGNSFGGALALALAIRAPDRVGRLVLMGAAGTRFALTEGLDAVWGYTPSIANMRALLDIFAFDRTLVNDELAKLRYDASVRPGYQEAFANMFPAPRQRWVDALASDEAKLRALPHDTLIVHGREDRVIPLDSSMRLLELLPNAQLHVFGRCGHWTQIEHAARFNRLVIEHFNE	sid|176070|pid|173763|hfid|40|sfid|5|gb|WP_069226497.1|taxonID|488732|Burkholderiadiffusa-AD*12	NCBI database (Nucleic Acids Res. 2016 Jan 4;44(D1):D733-45)
sid|178198	mCPHRa	AJP48854.1	MSSNPEIGLSIVANGIATNYHDQGSGDPVLMIHGSGPGVTAFANWRLSMPVLAKNFRVIAPDMVGFGYTERPAGIKYSMENWVSHALGLLDALKIERAHIVGNSFGGGLALALAIRAPERVNRLVLMGAAGTSFKLTQGLDDVWGYTPSFENMRKIMDIFAYDRSLVSDELAKLRYEASIRPGYQEAFSSMFPAPRQRWVDALASREEDVRALPHDTLIIHGREDQVLPLSASLKLFELISKSQLHVFGQCGHWTQIEHAERFTKLVGDFFLESSS	sid|178198|pid|178198|hfid|40|sfid|5|gb|AJP48854.1|taxonID|1565605|Rugosibacteraromaticivorans-AD*11	NCBI database (Nucleic Acids Res. 2016 Jan 4;44(D1):D733-45)
sid|182621	mCPHCn	WP_042877612.1	MQTNPETGRRIAANGIETNYHDLGDGHPVLLIHGSGPGVTAYANWRLTMPALAQQFRVIAPDMAGFGETERPAGYRYSMDNWVAHALGLLDALDIERAHVVGNSFGGALALALAIRAPERVGKLVLMGSAGMKFPLTEGLDAVWGYTPSIGNMRALLDIFAFDRTLVNDDLAKLRYEASIRPGYQEAFANMFPAPRQRWVDALASDEARIRALPHDTLIVHGRDDRVIPLASSLKLLELVPKSQLHAFGECGHWTQIEHAERFNRLVIGHFSESAAGLVSG	sid|182621|pid|182621|hfid|40|sfid|5|gb|WP_042877612.1|taxonID|106590|Cupriavidusnecator-AD*11	NCBI database (Nucleic Acids Res. 2016 Jan 4;44(D1):D733-45)
sid|171139	mCPHBd2	WP_059541090.1	MSANPELGRRIVAGGLDTNYHDLGDGPPVLLIHGSGPGVTAYANWRLTMPALAGQFRVIAPDMAGFGETERPRDYVYSMDHWVDHALGLLDALGVERAHVIGNSFGGALALALAIRAPDRVGRLVLMGAAGTRFTLTEGLDAVWGYTPSIANMRVLLDIFAFDRTLVNDELAKLRYDASVRPGYQEAFANMFPAPRQRWVDALASDEAKLRALPHDTLIVHGREDRVIPLDSSMRLLELLPNAQLHVFGRCGHWTQIEHAARFNRLVIEHFNE	sid|171139|pid|173763|hfid|40|sfid|5|gb|WP_059541090.1|taxonID|488732|Burkholderiadiffusa-AD*11	NCBI database (Nucleic Acids Res. 2016 Jan 4;44(D1):D733-45)
sid|181104	mCPHUb	ART39858.1	MGSNPEIGLSIAANGINTNYHDQGSGEPVLMIHGSGPGVTAFANWRLTMPVLAKNFRVIAPDMAGFGYTERPPGAQYSMSNWVDHALGLLDALKIESTHIVGNSFGGGLALALAIRAPERVKRLVLMGAAGTSFPLTQGLDDVWGYTPSFENMRKMMDIFAYNRNLVSDELAQLRYEASIRPGYQESFASMFPAPRQRWVDALASREEDVRALPHETLLIHGREDKVIPLSASHKLFELIPNAQLHVFGHCGHWTQIEHAGRFGRLVTDFFLES	sid|181104|pid|171087|hfid|40|sfid|5|gb|ART39858.1|taxonID|77133|unculturedbacterium-AD*10	NCBI database (Nucleic Acids Res. 2016 Jan 4;44(D1):D733-45)
sid|183201	mCPHPc	WP_089515094.1	MSNTAVNNPEIGKSIIAGGIKTNYQDHGQGDPIFLIHGSGPGVTAYANWRLTMPVLAEKFRVIAPDMVGFGFTERPANVSYTMDMWVSHALSLMDELKIEKAHLVGNSFGGGLALALALKAPDRVNRLVLMGAAGTKFQLTDGLDAVWGYKGTLEHMKELVGLFAFNKNLVSDDLAKLRYEASIRPGFQEAFSAMFPAPRQRWVDSLASDEGKIKTLTHETMIIHGRDDAIIPLSASLRLHDLIPKSQLHVFGQCGHWTQIEHSARFNQLLLNFFLEANAK	sid|183201|pid|183201|hfid|40|sfid|5|gb|WP_089515094.1|taxonID|351345|Polynucleobactercosmopolitanus-AD*8	NCBI database (Nucleic Acids Res. 2016 Jan 4;44(D1):D733-45)
sid|182795	mCPHPv	WP_026140314.1	MANPEIGKSIVAAGIQTNYHDLGEGTPVLLVHGSGPGVSAYANWRLTMPALSKNFRVIAADIVGFGFTHRPENYNYSMDNWVKHIIGVMDALEIEKAHIVGNSFGGALAIAIAIRHPGRIDRMVLMGAAGTQFELTNGLDAVWGYTPSIKNMRDLLDIFAYDRSLVSDELARLRYEASIQPGFQESFSRMFPAPRQRWVAALASSDADIKGLSNETLIIHGREDQVVPLSSSLRLVELIERAQLHVFGRCGHWTQIEQADRFNRLVVEFFDEASVLSHK	sid|182795|pid|182795|hfid|40|sfid|5|gb|WP_026140314.1|taxonID|76761|Pseudomonasveronii-AD*7	NCBI database (Nucleic Acids Res. 2016 Jan 4;44(D1):D733-45)
sid|12870	mCPHCsp	PHR82761.1	MTSNPEIGKSIKANGIKTNYHDVGKGDAVLLIHGSGPGVSAWANWRLNIPELAKSHRVIAPDMVGFGYTERPTDNQYSMDGWVEQVIGLLDALNIDKASVVGNSFGGGLALAIAIRYPERVNKLVLMGSVGVSFDLTEGLDKVWGYQPSIANMKQLLDIFAYNRELVSDELAELRYKASIQEGFQESFSSMFPAPRQRWIEAMQSSAEYIQHIEHKTLIIHGRDDKVIPLDNAYKLIELIKHAQLHVYSECGHWIQIEKKEEFNQLVSNFLQTSLEHNYEN	sid|12870|pid|12870|hfid|40|sfid|5|gb|PHR82761.1|taxonID|56799|Colwelliasp.-AD*4	NCBI database (Nucleic Acids Res. 2016 Jan 4;44(D1):D733-45)
sid|180273	mCPHBc	WP_014900537.1	MSTNPELGRRIIAGGLDTNYHDLGDGPPVLLIHGSGPGVTAYANWRLTMPALATQFRVIAPDMAGFGETERPRGYAYSMDNWVDHALGLLDALGVERAHVIGNSFGGALALALAIRAPDRVGRLVLMGAAGTRFTLTEGLDAVWGYTPSIANMRGLLDIFAFDRTLVNDDLAKLRYDASVRPGYQEAFANMFPAPRQRWVDALASDDAKLRALTHDTLIVHGREDRVIPLESSTKLLELLPNAQLHVFGRCGHWTQIEHAARFNRLVIEHFNE	sid|180273|pid|176456|hfid|40|sfid|5|gb|WP_014900537.1|taxonID|292|Burkholderiacepacia-AD*12	NCBI database (Nucleic Acids Res. 2016 Jan 4;44(D1):D733-45)

## Sheet: Table S5 Pairwise identity
	EH1(72)	EH2(71)	EH3(69)	CalB(68)	EH4(67)	EH5(67)	EH6(66)	EH7(64)	EH8(63)	EH9(61)	EH10(58)	EH11(53)	EH12(51)	EH13(49)	EH14(48)	EH15(42)	EH16(42)	EH17(39)	EH18(38)	EH19(37)	EH20(37)	EH21(36)	CalA(36)	EH22(35)	EH23(34)	EH24(34)	EH25(33)	EH26(32)	EH27(32)	EH28(31)	EH29(31)	EH30(30)	EH31(29)	EH32(29)	EH33(29)	EH34(29)	EH35(29)	EH36(28)	EH37(28)	EH38(28)	EH39(28)	EH40(27)	EH41(27)	EH42(27)	EH43(27)	EH44(25)	EH45(24)	EH46(23)	EH47(23)
EH1(72)	dg	134/347 (38.6%)	88/390 (22.6%)	34/522 ( 6.5%)	131/350 (37.4%)	141/329 (42.9%)	134/335 (40.0%)	52/547 ( 9.5%)	124/382 (32.5%)	144/350 (41.1%)	131/350 (37.4%)	128/325 (39.4%)	139/318 (43.7%)	148/338 (43.8%)	116/373 (31.1%)	85/342 (24.9%)	138/318 (43.4%)	34/491 ( 6.9%)	84/390 (21.5%)	36/480 ( 7.5%)	80/579 (13.8%)	128/337 (38.0%)	57/608 ( 9.4%)	129/320 (40.3%)	79/410 (19.3%)	46/543 ( 8.5%)	81/419 (19.3%)	50/445 (11.2%)	42/582 ( 7.2%)	44/584 ( 7.5%)	130/320 (40.6%)	49/382 (12.8%)	59/371 (15.9%)	40/524 ( 7.6%)	66/377 (17.5%)	40/410 ( 9.8%)	135/328 (41.2%)	66/377 (17.5%)	91/385 (23.6%)	19/545 ( 3.5%)	87/358 (24.3%)	63/567 (11.1%)	75/403 (18.6%)	88/323 (27.2%)	96/345 (27.8%)	61/358 (17.0%)	52/375 (13.9%)	75/714 (10.5%)	22/499 ( 4.4%)
EH2(71)	134/347 (38.6%)	dg	103/403 (25.6%)	79/430 (18.4%)	258/342 (75.4%)	137/344 (39.8%)	138/347 (39.8%)	48/579 ( 8.3%)	138/347 (39.8%)	139/351 (39.6%)	138/367 (37.6%)	122/343 (35.6%)	137/344 (39.8%)	136/349 (39.0%)	122/379 (32.2%)	91/360 (25.3%)	137/344 (39.8%)	22/566 ( 3.9%)	100/408 (24.5%)	52/400 (13.0%)	80/581 (13.8%)	108/356 (30.3%)	24/735 ( 3.3%)	124/349 (35.5%)	91/404 (22.5%)	74/492 (15.0%)	95/381 (24.9%)	66/430 (15.3%)	49/578 ( 8.5%)	75/493 (15.2%)	125/349 (35.8%)	44/389 (11.3%)	55/365 (15.1%)	27/556 ( 4.9%)	21/554 ( 3.8%)	49/411 (11.9%)	123/345 (35.7%)	21/554 ( 3.8%)	95/362 (26.2%)	55/383 (14.4%)	97/373 (26.0%)	12/793 ( 1.5%)	77/437 (17.6%)	80/349 (22.9%)	90/353 (25.5%)	5/586 ( 0.9%)	55/371 (14.8%)	47/808 ( 5.8%)	50/406 (12.3%)
EH3(69)	88/390 (22.6%)	103/403 (25.6%)	dg	44/526 ( 8.4%)	91/388 (23.5%)	91/384 (23.7%)	92/377 (24.4%)	45/597 ( 7.5%)	86/415 (20.7%)	88/412 (21.4%)	97/385 (25.2%)	83/368 (22.6%)	86/397 (21.7%)	103/374 (27.5%)	85/433 (19.6%)	75/367 (20.4%)	89/384 (23.2%)	58/446 (13.0%)	221/348 (63.5%)	57/428 (13.3%)	70/600 (11.7%)	80/381 (21.0%)	87/547 (15.9%)	95/378 (25.1%)	86/400 (21.5%)	47/584 ( 8.0%)	85/394 (21.6%)	51/465 (11.0%)	55/563 ( 9.8%)	74/484 (15.3%)	95/378 (25.1%)	44/401 (11.0%)	44/403 (10.9%)	60/434 (13.8%)	51/451 (11.3%)	57/375 (15.2%)	93/375 (24.8%)	51/451 (11.3%)	88/383 (23.0%)	62/429 (14.5%)	77/401 (19.2%)	71/588 (12.1%)	79/392 (20.2%)	73/400 (18.2%)	87/364 (23.9%)	67/400 (16.8%)	57/380 (15.0%)	63/770 ( 8.2%)	56/405 (13.8%)
CalB(68)	37/513 ( 7.2%)	79/429 (18.4%)	44/526 ( 8.4%)	dg	93/410 (22.7%)	69/385 (17.9%)	45/483 ( 9.3%)	70/491 (14.3%)	68/455 (14.9%)	70/399 (17.5%)	55/470 (11.7%)	38/492 ( 7.7%)	42/489 ( 8.6%)	52/498 (10.4%)	62/473 (13.1%)	62/417 (14.9%)	70/405 (17.3%)	67/388 (17.3%)	41/506 ( 8.1%)	58/347 (16.7%)	70/561 (12.5%)	63/444 (14.2%)	48/627 ( 7.7%)	42/484 ( 8.7%)	59/473 (12.5%)	53/535 ( 9.9%)	39/562 ( 6.9%)	69/389 (17.7%)	46/579 ( 7.9%)	77/467 (16.5%)	38/476 ( 8.0%)	47/379 (12.4%)	27/488 ( 5.5%)	26/556 ( 4.7%)	50/386 (13.0%)	36/421 ( 8.6%)	47/489 ( 9.6%)	59/396 (14.9%)	47/492 ( 9.6%)	53/435 (12.2%)	38/493 ( 7.7%)	82/537 (15.3%)	68/396 (17.2%)	31/503 ( 6.2%)	43/462 ( 9.3%)	31/477 ( 6.5%)	46/402 (11.4%)	29/849 ( 3.4%)	54/417 (12.9%)
EH4(67)	131/350 (37.4%)	258/342 (75.4%)	91/388 (23.5%)	93/410 (22.7%)	dg	136/344 (39.5%)	134/349 (38.4%)	68/550 (12.4%)	135/348 (38.8%)	126/347 (36.3%)	129/357 (36.1%)	121/347 (34.9%)	131/354 (37.0%)	140/348 (40.2%)	128/391 (32.7%)	90/362 (24.9%)	137/347 (39.5%)	60/392 (15.3%)	87/402 (21.6%)	69/392 (17.6%)	80/541 (14.8%)	105/357 (29.4%)	83/527 (15.7%)	120/346 (34.7%)	89/390 (22.8%)	38/632 ( 6.0%)	102/376 (27.1%)	38/506 ( 7.5%)	52/561 ( 9.3%)	73/481 (15.2%)	121/346 (35.0%)	37/401 ( 9.2%)	57/366 (15.6%)	48/493 ( 9.7%)	67/399 (16.8%)	60/359 (16.7%)	124/347 (35.7%)	67/399 (16.8%)	99/364 (27.2%)	60/403 (14.9%)	93/380 (24.5%)	73/587 (12.4%)	79/401 (19.7%)	80/347 (23.1%)	81/346 (23.4%)	5/587 ( 0.9%)	44/439 (10.0%)	53/824 ( 6.4%)	65/397 (16.4%)
EH5(67)	141/329 (42.9%)	137/344 (39.8%)	91/384 (23.7%)	69/385 (17.9%)	136/344 (39.5%)	dg	143/314 (45.5%)	70/475 (14.7%)	113/356 (31.7%)	222/318 (69.8%)	138/350 (39.4%)	127/314 (40.4%)	298/313 (95.2%)	146/335 (43.6%)	107/379 (28.2%)	92/321 (28.7%)	290/313 (92.7%)	67/385 (17.4%)	96/381 (25.2%)	54/386 (14.0%)	74/559 (13.2%)	114/358 (31.8%)	70/500 (14.0%)	132/316 (41.8%)	86/392 (21.9%)	65/521 (12.5%)	88/377 (23.3%)	54/414 (13.0%)	26/625 ( 4.2%)	80/467 (17.1%)	133/316 (42.1%)	58/338 (17.2%)	62/356 (17.4%)	32/518 ( 6.2%)	64/368 (17.4%)	63/360 (17.5%)	135/316 (42.7%)	65/368 (17.7%)	97/351 (27.6%)	61/374 (16.3%)	82/368 (22.3%)	69/593 (11.6%)	68/384 (17.7%)	81/334 (24.3%)	101/353 (28.6%)	56/405 (13.8%)	59/366 (16.1%)	66/694 ( 9.5%)	58/380 (15.3%)
EH6(66)	134/335 (40.0%)	138/347 (39.8%)	92/377 (24.4%)	45/483 ( 9.3%)	134/349 (38.4%)	143/314 (45.5%)	dg	35/604 ( 5.8%)	109/347 (31.4%)	140/324 (43.2%)	150/348 (43.1%)	138/343 (40.2%)	147/314 (46.8%)	145/329 (44.1%)	115/382 (30.1%)	88/330 (26.7%)	147/316 (46.5%)	64/395 (16.2%)	98/382 (25.7%)	38/437 ( 8.7%)	73/584 (12.5%)	115/328 (35.1%)	66/548 (12.0%)	128/319 (40.1%)	83/390 (21.3%)	71/486 (14.6%)	87/379 (23.0%)	59/423 (13.9%)	20/650 ( 3.1%)	49/522 ( 9.4%)	129/319 (40.4%)	60/355 (16.9%)	58/345 (16.8%)	51/432 (11.8%)	72/370 (19.5%)	47/376 (12.5%)	156/315 (49.5%)	72/370 (19.5%)	96/344 (27.9%)	68/381 (17.8%)	97/362 (26.8%)	65/584 (11.1%)	77/365 (21.1%)	87/347 (25.1%)	89/317 (28.1%)	61/352 (17.3%)	56/365 (15.3%)	12/902 ( 1.3%)	42/425 ( 9.9%)
EH7(64)	52/547 ( 9.5%)	48/579 ( 8.3%)	45/597 ( 7.5%)	70/491 (14.3%)	68/550 (12.4%)	70/478 (14.6%)	35/604 ( 5.8%)	dg	75/474 (15.8%)	74/490 (15.1%)	83/478 (17.4%)	59/522 (11.3%)	71/478 (14.9%)	75/502 (14.9%)	46/611 ( 7.5%)	75/476 (15.8%)	74/478 (15.5%)	48/520 ( 9.2%)	61/557 (11.0%)	36/571 ( 6.3%)	50/733 ( 6.8%)	49/569 ( 8.6%)	94/562 (16.7%)	73/502 (14.5%)	72/492 (14.6%)	102/477 (21.4%)	44/632 ( 7.0%)	30/592 ( 5.1%)	180/414 (43.5%)	36/684 ( 5.3%)	72/502 (14.3%)	48/485 ( 9.9%)	50/482 (10.4%)	7/695 ( 1.0%)	31/562 ( 5.5%)	29/522 ( 5.6%)	66/530 (12.5%)	32/562 ( 5.7%)	16/702 ( 2.3%)	41/527 ( 7.8%)	86/497 (17.3%)	97/619 (15.7%)	65/523 (12.4%)	68/466 (14.6%)	68/486 (14.0%)	45/536 ( 8.4%)	45/453 ( 9.9%)	82/765 (10.7%)	31/560 ( 5.5%)
EH8(63)	124/382 (32.5%)	138/347 (39.8%)	86/415 (20.7%)	68/455 (14.9%)	135/348 (38.8%)	113/356 (31.7%)	109/347 (31.4%)	75/474 (15.8%)	dg	112/348 (32.2%)	126/365 (34.5%)	124/354 (35.0%)	120/358 (33.5%)	133/349 (38.1%)	134/385 (34.8%)	86/374 (23.0%)	116/358 (32.4%)	45/508 ( 8.9%)	98/412 (23.8%)	58/424 (13.7%)	91/541 (16.8%)	124/351 (35.3%)	95/505 (18.8%)	117/351 (33.3%)	89/391 (22.8%)	12/720 ( 1.7%)	101/421 (24.0%)	70/398 (17.6%)	86/499 (17.2%)	54/530 (10.2%)	118/351 (33.6%)	68/380 (17.9%)	60/372 (16.1%)	40/521 ( 7.7%)	33/487 ( 6.8%)	47/395 (11.9%)	120/355 (33.8%)	33/487 ( 6.8%)	88/389 (22.6%)	55/440 (12.5%)	89/390 (22.8%)	85/557 (15.3%)	71/399 (17.8%)	82/360 (22.8%)	102/368 (27.7%)	20/555 ( 3.6%)	52/392 (13.3%)	20/920 ( 2.2%)	31/483 ( 6.4%)
EH9(61)	144/350 (41.1%)	139/351 (39.6%)	88/412 (21.4%)	70/399 (17.5%)	126/347 (36.3%)	222/318 (69.8%)	140/324 (43.2%)	74/490 (15.1%)	112/348 (32.2%)	dg	136/352 (38.6%)	129/323 (39.9%)	219/318 (68.9%)	145/338 (42.9%)	107/384 (27.9%)	95/330 (28.8%)	223/318 (70.1%)	31/498 ( 6.2%)	95/389 (24.4%)	47/447 (10.5%)	87/562 (15.5%)	119/332 (35.8%)	79/499 (15.8%)	139/320 (43.4%)	85/382 (22.3%)	66/517 (12.8%)	88/394 (22.3%)	63/407 (15.5%)	80/498 (16.1%)	52/541 ( 9.6%)	140/320 (43.8%)	54/384 (14.1%)	66/351 (18.8%)	67/396 (16.9%)	28/491 ( 5.7%)	42/408 (10.3%)	130/327 (39.8%)	28/491 ( 5.7%)	99/362 (27.3%)	52/402 (12.9%)	89/368 (24.2%)	89/566 (15.7%)	70/398 (17.6%)	81/336 (24.1%)	95/332 (28.6%)	64/390 (16.4%)	67/369 (18.2%)	63/747 ( 8.4%)	55/368 (14.9%)
EH10(58)	131/350 (37.4%)	138/367 (37.6%)	97/385 (25.2%)	55/470 (11.7%)	129/357 (36.1%)	138/350 (39.4%)	150/356 (42.1%)	83/478 (17.4%)	126/365 (34.5%)	136/352 (38.6%)	dg	137/351 (39.0%)	140/352 (39.8%)	142/356 (39.9%)	120/384 (31.2%)	87/372 (23.4%)	139/347 (40.1%)	67/416 (16.1%)	105/395 (26.6%)	57/422 (13.5%)	83/585 (14.2%)	123/359 (34.3%)	71/527 (13.5%)	142/345 (41.2%)	81/387 (20.9%)	45/580 ( 7.8%)	82/409 (20.0%)	44/462 ( 9.5%)	36/662 ( 5.4%)	23/666 ( 3.5%)	143/345 (41.4%)	54/396 (13.6%)	56/363 (15.4%)	36/528 ( 6.8%)	70/421 (16.6%)	62/365 (17.0%)	138/342 (40.4%)	71/421 (16.9%)	99/393 (25.2%)	64/415 (15.4%)	90/377 (23.9%)	63/611 (10.3%)	76/384 (19.8%)	68/376 (18.1%)	90/350 (25.7%)	62/405 (15.3%)	58/401 (14.5%)	67/719 ( 9.3%)	52/423 (12.3%)
EH11(53)	128/325 (39.4%)	122/343 (35.6%)	83/368 (22.6%)	38/492 ( 7.7%)	121/347 (34.9%)	127/314 (40.4%)	138/343 (40.2%)	59/522 (11.3%)	124/354 (35.0%)	129/323 (39.9%)	137/351 (39.0%)	dg	124/314 (39.5%)	155/329 (47.1%)	120/361 (33.2%)	88/344 (25.6%)	122/314 (38.9%)	66/369 (17.9%)	85/373 (22.8%)	27/501 ( 5.4%)	85/573 (14.8%)	125/338 (37.0%)	77/552 (13.9%)	150/315 (47.6%)	77/396 (19.4%)	54/549 ( 9.8%)	73/415 (17.6%)	43/436 ( 9.9%)	47/577 ( 8.1%)	57/488 (11.7%)	151/315 (47.9%)	56/346 (16.2%)	14/509 ( 2.8%)	39/496 ( 7.9%)	66/398 (16.6%)	58/336 (17.3%)	127/322 (39.4%)	66/398 (16.6%)	101/333 (30.3%)	26/507 ( 5.1%)	91/363 (25.1%)	65/596 (10.9%)	80/363 (22.0%)	88/337 (26.1%)	90/326 (27.6%)	47/381 (12.3%)	59/365 (16.2%)	3/940 ( 0.3%)	11/542 ( 2.0%)
EH12(51)	139/318 (43.7%)	137/344 (39.8%)	86/397 (21.7%)	42/489 ( 8.6%)	131/354 (37.0%)	298/313 (95.2%)	147/314 (46.8%)	71/475 (14.9%)	120/358 (33.5%)	219/318 (68.9%)	140/352 (39.8%)	124/314 (39.5%)	dg	143/335 (42.7%)	108/372 (29.0%)	87/321 (27.1%)	295/313 (94.2%)	67/385 (17.4%)	97/388 (25.0%)	54/392 (13.8%)	76/550 (13.8%)	112/355 (31.5%)	25/711 ( 3.5%)	132/316 (41.8%)	81/392 (20.7%)	65/518 (12.5%)	87/373 (23.3%)	61/389 (15.7%)	73/517 (14.1%)	83/439 (18.9%)	133/316 (42.1%)	58/345 (16.8%)	57/354 (16.1%)	29/532 ( 5.5%)	65/368 (17.7%)	61/354 (17.2%)	134/316 (42.4%)	66/368 (17.9%)	97/348 (27.9%)	51/372 (13.7%)	90/345 (26.1%)	67/610 (11.0%)	64/393 (16.3%)	80/327 (24.5%)	94/337 (27.9%)	61/365 (16.7%)	47/366 (12.8%)	64/698 ( 9.2%)	65/355 (18.3%)
EH13(49)	148/338 (43.8%)	136/349 (39.0%)	103/374 (27.5%)	52/498 (10.4%)	140/348 (40.2%)	146/335 (43.6%)	145/329 (44.1%)	75/502 (14.9%)	133/349 (38.1%)	145/338 (42.9%)	142/356 (39.9%)	155/329 (47.1%)	143/335 (42.7%)	dg	129/369 (35.0%)	93/351 (26.5%)	144/335 (43.0%)	40/500 ( 8.0%)	97/378 (25.7%)	28/514 ( 5.4%)	93/525 (17.7%)	124/332 (37.3%)	78/516 (15.1%)	151/348 (43.4%)	96/400 (24.0%)	80/479 (16.7%)	87/388 (22.4%)	42/481 ( 8.7%)	63/519 (12.1%)	67/527 (12.7%)	152/348 (43.7%)	69/363 (19.0%)	14/521 ( 2.7%)	77/391 (19.7%)	65/429 (15.2%)	43/380 (11.3%)	150/330 (45.5%)	65/429 (15.2%)	114/361 (31.6%)	32/519 ( 6.2%)	92/369 (24.9%)	75/585 (12.8%)	82/362 (22.7%)	82/336 (24.4%)	96/347 (27.7%)	32/487 ( 6.6%)	56/375 (14.9%)	78/683 (11.4%)	51/416 (12.3%)
EH14(48)	116/373 (31.1%)	122/379 (32.2%)	85/433 (19.6%)	62/473 (13.1%)	128/391 (32.7%)	107/379 (28.2%)	115/382 (30.1%)	45/611 ( 7.4%)	134/385 (34.8%)	107/384 (27.9%)	120/384 (31.2%)	119/363 (32.8%)	108/372 (29.0%)	129/369 (35.0%)	dg	87/397 (21.9%)	105/364 (28.8%)	65/422 (15.4%)	86/405 (21.2%)	55/417 (13.2%)	89/551 (16.2%)	106/359 (29.5%)	72/580 (12.4%)	121/366 (33.1%)	95/401 (23.7%)	48/592 ( 8.1%)	78/468 (16.7%)	54/458 (11.8%)	57/587 ( 9.7%)	83/467 (17.8%)	122/366 (33.3%)	44/441 (10.0%)	21/541 ( 3.9%)	49/518 ( 9.5%)	69/405 (17.0%)	48/384 (12.5%)	114/374 (30.5%)	69/405 (17.0%)	85/400 (21.2%)	56/420 (13.3%)	89/389 (22.9%)	58/649 ( 8.9%)	71/420 (16.9%)	85/389 (21.9%)	93/368 (25.3%)	23/556 ( 4.1%)	59/386 (15.3%)	16/962 ( 1.7%)	50/416 (12.0%)
EH15(42)	85/342 (24.9%)	91/360 (25.3%)	75/367 (20.4%)	62/417 (14.9%)	90/362 (24.9%)	92/321 (28.7%)	88/330 (26.7%)	75/476 (15.8%)	86/374 (23.0%)	95/330 (28.8%)	87/372 (23.4%)	88/344 (25.6%)	87/321 (27.1%)	93/351 (26.5%)	87/397 (21.9%)	dg	94/326 (28.8%)	55/388 (14.2%)	79/379 (20.8%)	64/352 (18.2%)	75/574 (13.1%)	84/335 (25.1%)	63/503 (12.5%)	100/363 (27.5%)	101/367 (27.5%)	60/524 (11.5%)	105/376 (27.9%)	36/471 ( 7.6%)	59/489 (12.1%)	74/421 (17.6%)	100/363 (27.5%)	51/334 (15.3%)	57/339 (16.8%)	66/423 (15.6%)	50/389 (12.9%)	57/318 (17.9%)	84/336 (25.0%)	50/389 (12.9%)	91/326 (27.9%)	55/382 (14.4%)	100/324 (30.9%)	69/565 (12.2%)	70/378 (18.5%)	110/313 (35.1%)	120/298 (40.3%)	62/360 (17.2%)	61/348 (17.5%)	76/666 (11.4%)	63/351 (17.9%)
EH16(42)	138/318 (43.4%)	137/344 (39.8%)	89/384 (23.2%)	70/405 (17.3%)	137/347 (39.5%)	290/313 (92.7%)	147/316 (46.5%)	74/475 (15.6%)	116/358 (32.4%)	223/318 (70.1%)	139/347 (40.1%)	122/314 (38.9%)	295/313 (94.2%)	144/335 (43.0%)	105/364 (28.8%)	93/329 (28.3%)	dg	63/388 (16.2%)	94/393 (23.9%)	56/392 (14.3%)	75/552 (13.6%)	115/353 (32.6%)	25/712 ( 3.5%)	134/316 (42.4%)	83/399 (20.8%)	67/530 (12.6%)	92/378 (24.3%)	75/374 (20.1%)	38/562 ( 6.8%)	46/537 ( 8.6%)	135/316 (42.7%)	57/345 (16.5%)	58/354 (16.4%)	22/538 ( 4.1%)	44/460 ( 9.6%)	60/360 (16.7%)	134/316 (42.4%)	44/460 ( 9.6%)	95/347 (27.4%)	58/369 (15.7%)	93/342 (27.2%)	65/630 (10.3%)	62/400 (15.5%)	84/336 (25.0%)	98/325 (30.2%)	50/398 (12.6%)	55/342 (16.1%)	64/690 ( 9.3%)	57/377 (15.1%)
EH17(39)	34/491 ( 6.9%)	22/566 ( 3.9%)	58/446 (13.0%)	67/388 (17.3%)	60/392 (15.3%)	67/385 (17.4%)	62/399 (15.5%)	48/520 ( 9.2%)	45/508 ( 8.9%)	31/498 ( 6.2%)	67/416 (16.1%)	66/369 (17.9%)	67/385 (17.4%)	40/500 ( 8.0%)	65/422 (15.4%)	55/388 (14.2%)	60/401 (15.0%)	dg	73/405 (18.0%)	96/312 (30.8%)	75/550 (13.6%)	55/381 (14.4%)	68/529 (12.9%)	36/482 ( 7.5%)	64/422 (15.2%)	61/480 (12.7%)	55/450 (12.2%)	84/350 (24.0%)	59/510 (11.6%)	70/427 (16.4%)	64/425 (15.1%)	47/355 (13.2%)	70/316 (22.2%)	66/343 (19.2%)	185/283 (65.4%)	46/348 (13.2%)	57/424 (13.4%)	185/283 (65.4%)	64/382 (16.8%)	100/289 (34.6%)	63/393 (16.0%)	66/558 (11.8%)	59/401 (14.7%)	64/333 (19.2%)	63/350 (18.0%)	61/359 (17.0%)	39/371 (10.5%)	74/675 (11.0%)	69/308 (22.4%)
EH18(38)	84/390 (21.5%)	100/408 (24.5%)	221/348 (63.5%)	41/506 ( 8.1%)	87/402 (21.6%)	95/395 (24.1%)	98/382 (25.7%)	61/557 (11.0%)	98/412 (23.8%)	95/389 (24.4%)	105/395 (26.6%)	85/373 (22.8%)	97/388 (25.0%)	97/378 (25.7%)	86/405 (21.2%)	79/379 (20.8%)	94/393 (23.9%)	73/405 (18.0%)	dg	61/408 (15.0%)	78/578 (13.5%)	90/372 (24.2%)	83/524 (15.8%)	96/374 (25.7%)	88/405 (21.7%)	39/605 ( 6.4%)	83/396 (21.0%)	61/429 (14.2%)	70/538 (13.0%)	51/551 ( 9.3%)	96/374 (25.7%)	52/380 (13.7%)	60/397 (15.1%)	70/429 (16.3%)	64/418 (15.3%)	62/385 (16.1%)	97/378 (25.7%)	64/418 (15.3%)	102/396 (25.8%)	67/401 (16.7%)	78/383 (20.4%)	52/634 ( 8.2%)	66/409 (16.1%)	72/378 (19.0%)	86/378 (22.8%)	66/415 (15.9%)	60/365 (16.4%)	69/744 ( 9.3%)	66/410 (16.1%)
EH19(37)	36/480 ( 7.5%)	52/400 (13.0%)	57/428 (13.3%)	58/347 (16.7%)	69/392 (17.6%)	54/386 (14.0%)	38/437 ( 8.7%)	36/571 ( 6.3%)	58/424 (13.7%)	47/447 (10.5%)	57/422 (13.5%)	27/501 ( 5.4%)	54/392 (13.8%)	28/514 ( 5.4%)	55/417 (13.2%)	64/352 (18.2%)	56/392 (14.3%)	96/312 (30.8%)	61/408 (15.0%)	dg	64/541 (11.8%)	52/439 (11.8%)	65/533 (12.2%)	54/403 (13.4%)	64/411 (15.6%)	59/489 (12.1%)	36/513 ( 7.0%)	65/341 (19.1%)	24/586 ( 4.1%)	68/422 (16.1%)	56/406 (13.8%)	57/318 (17.9%)	64/325 (19.7%)	18/545 ( 3.3%)	103/299 (34.4%)	48/339 (14.2%)	44/465 ( 9.5%)	102/299 (34.1%)	19/549 ( 3.5%)	96/299 (32.1%)	35/507 ( 6.9%)	43/600 ( 7.2%)	64/368 (17.4%)	68/322 (21.1%)	64/358 (17.9%)	54/384 (14.1%)	54/323 (16.7%)	65/719 ( 9.0%)	72/318 (22.6%)
EH20(37)	80/579 (13.8%)	80/581 (13.8%)	70/599 (11.7%)	70/561 (12.5%)	80/541 (14.8%)	74/559 (13.2%)	73/584 (12.5%)	50/733 ( 6.8%)	91/541 (16.8%)	87/562 (15.5%)	83/585 (14.2%)	85/573 (14.8%)	76/550 (13.8%)	93/525 (17.7%)	89/557 (16.0%)	74/573 (12.9%)	75/552 (13.6%)	75/550 (13.6%)	78/578 (13.5%)	65/538 (12.1%)	dg	80/514 (15.6%)	75/707 (10.6%)	78/517 (15.1%)	81/585 (13.8%)	56/722 ( 7.8%)	70/597 (11.7%)	70/560 (12.5%)	43/789 ( 5.4%)	87/636 (13.7%)	78/517 (15.1%)	64/539 (11.9%)	39/597 ( 6.5%)	69/586 (11.8%)	70/520 (13.5%)	57/564 (10.1%)	83/585 (14.2%)	70/520 (13.5%)	97/548 (17.7%)	52/597 ( 8.7%)	81/597 (13.6%)	90/677 (13.3%)	76/560 (13.6%)	63/563 (11.2%)	68/544 (12.5%)	52/584 ( 8.9%)	60/520 (11.5%)	53/947 ( 5.6%)	65/505 (12.9%)
EH21(36)	128/337 (38.0%)	108/356 (30.3%)	80/381 (21.0%)	63/444 (14.2%)	105/357 (29.4%)	114/358 (31.8%)	115/328 (35.1%)	49/569 ( 8.6%)	124/351 (35.3%)	119/332 (35.8%)	123/359 (34.3%)	125/338 (37.0%)	112/355 (31.5%)	124/332 (37.3%)	106/359 (29.5%)	80/337 (23.7%)	115/353 (32.6%)	55/381 (14.4%)	90/372 (24.2%)	52/439 (11.8%)	80/514 (15.6%)	dg	65/527 (12.3%)	120/323 (37.2%)	70/395 (17.7%)	48/587 ( 8.2%)	87/375 (23.2%)	48/481 (10.0%)	36/597 ( 6.0%)	70/455 (15.4%)	121/323 (37.5%)	51/395 (12.9%)	37/433 ( 8.5%)	10/560 ( 1.8%)	64/367 (17.4%)	34/412 ( 8.3%)	115/341 (33.7%)	64/367 (17.4%)	92/360 (25.6%)	60/386 (15.5%)	82/351 (23.4%)	66/603 (10.9%)	64/389 (16.5%)	73/360 (20.3%)	86/352 (24.4%)	3/557 ( 0.5%)	20/480 ( 4.2%)	11/902 ( 1.2%)	33/485 ( 6.8%)
CalA(36)	57/608 ( 9.4%)	24/735 ( 3.3%)	87/547 (15.9%)	48/627 ( 7.7%)	84/523 (16.1%)	26/714 ( 3.6%)	66/548 (12.0%)	92/561 (16.4%)	95/505 (18.8%)	79/499 (15.8%)	71/527 (13.5%)	77/552 (13.9%)	25/711 ( 3.5%)	78/516 (15.1%)	72/580 (12.4%)	63/503 (12.5%)	25/712 ( 3.5%)	68/529 (12.9%)	83/524 (15.8%)	65/533 (12.2%)	75/707 (10.6%)	62/535 (11.6%)	dg	77/515 (15.0%)	79/555 (14.2%)	44/742 ( 5.9%)	53/612 ( 8.7%)	43/608 ( 7.1%)	76/590 (12.9%)	61/630 ( 9.7%)	77/515 (15.0%)	52/481 (10.8%)	61/506 (12.1%)	68/552 (12.3%)	64/548 (11.7%)	56/486 (11.5%)	83/499 (16.6%)	64/548 (11.7%)	49/652 ( 7.5%)	54/538 (10.0%)	71/529 (13.4%)	105/624 (16.8%)	90/511 (17.6%)	67/507 (13.2%)	64/539 (11.9%)	8/695 ( 1.2%)	54/498 (10.8%)	92/806 (11.4%)	51/513 ( 9.9%)
EH22(35)	129/320 (40.3%)	124/349 (35.5%)	95/378 (25.1%)	41/478 ( 8.6%)	120/346 (34.7%)	132/316 (41.8%)	128/319 (40.1%)	73/502 (14.5%)	117/351 (33.3%)	139/320 (43.4%)	142/345 (41.2%)	150/315 (47.6%)	132/316 (41.8%)	151/348 (43.4%)	121/366 (33.1%)	100/363 (27.5%)	134/316 (42.4%)	36/482 ( 7.5%)	96/374 (25.7%)	54/403 (13.4%)	78/517 (15.1%)	120/323 (37.2%)	77/515 (15.0%)	dg	92/410 (22.4%)	51/557 ( 9.2%)	86/391 (22.0%)	55/441 (12.5%)	53/550 ( 9.6%)	68/485 (14.0%)	311/313 (99.4%)	54/366 (14.8%)	54/348 (15.5%)	39/498 ( 7.8%)	30/495 ( 6.1%)	52/354 (14.7%)	143/324 (44.1%)	30/495 ( 6.1%)	102/343 (29.7%)	55/366 (15.0%)	97/347 (28.0%)	78/586 (13.3%)	72/393 (18.3%)	93/338 (27.5%)	83/330 (25.2%)	61/387 (15.8%)	56/355 (15.8%)	8/919 ( 0.9%)	9/551 ( 1.6%)
EH23(34)	79/410 (19.3%)	91/404 (22.5%)	86/400 (21.5%)	59/473 (12.5%)	89/390 (22.8%)	86/392 (21.9%)	83/390 (21.3%)	72/492 (14.6%)	89/391 (22.8%)	85/382 (22.3%)	81/387 (20.9%)	78/395 (19.7%)	81/392 (20.7%)	91/419 (21.7%)	95/401 (23.7%)	101/367 (27.5%)	83/399 (20.8%)	64/422 (15.2%)	88/405 (21.7%)	64/411 (15.6%)	81/596 (13.6%)	70/395 (17.7%)	79/555 (14.2%)	92/410 (22.4%)	dg	38/640 ( 5.9%)	94/391 (24.0%)	42/482 ( 8.7%)	43/610 ( 7.0%)	57/557 (10.2%)	92/410 (22.4%)	52/401 (13.0%)	59/379 (15.6%)	16/600 ( 2.7%)	53/459 (11.5%)	58/359 (16.2%)	79/384 (20.6%)	53/459 (11.5%)	89/395 (22.5%)	49/429 (11.4%)	81/386 (21.0%)	93/586 (15.9%)	70/400 (17.5%)	87/382 (22.8%)	88/376 (23.4%)	56/404 (13.9%)	43/401 (10.7%)	91/707 (12.9%)	56/419 (13.4%)
EH24(34)	46/543 ( 8.5%)	74/492 (15.0%)	47/584 ( 8.0%)	52/533 ( 9.8%)	38/632 ( 6.0%)	65/521 (12.5%)	71/486 (14.6%)	102/477 (21.4%)	12/720 ( 1.7%)	66/517 (12.8%)	45/580 ( 7.8%)	54/549 ( 9.8%)	65/518 (12.5%)	80/479 (16.7%)	48/592 ( 8.1%)	60/524 (11.5%)	67/530 (12.6%)	61/480 (12.7%)	39/605 ( 6.4%)	59/489 (12.1%)	56/722 ( 7.8%)	48/587 ( 8.2%)	44/742 ( 5.9%)	51/557 ( 9.2%)	38/640 ( 5.9%)	dg	81/523 (15.5%)	68/514 (13.2%)	104/493 (21.1%)	75/560 (13.4%)	67/495 (13.5%)	60/439 (13.7%)	33/547 ( 6.0%)	63/537 (11.7%)	38/553 ( 6.9%)	40/502 ( 8.0%)	51/567 ( 9.0%)	38/553 ( 6.9%)	70/512 (13.7%)	61/453 (13.5%)	66/511 (12.9%)	92/572 (16.1%)	78/477 (16.4%)	47/535 ( 8.8%)	46/570 ( 8.1%)	59/486 (12.1%)	32/535 ( 6.0%)	40/900 ( 4.4%)	36/553 ( 6.5%)
EH25(33)	81/419 (19.3%)	95/381 (24.9%)	85/394 (21.6%)	39/562 ( 6.9%)	102/376 (27.1%)	88/377 (23.3%)	87/379 (23.0%)	44/632 ( 7.0%)	101/421 (24.0%)	88/394 (22.3%)	82/409 (20.0%)	73/415 (17.6%)	87/373 (23.3%)	87/388 (22.4%)	78/468 (16.7%)	105/376 (27.9%)	92/378 (24.3%)	55/450 (12.2%)	83/396 (21.0%)	36/513 ( 7.0%)	70/597 (11.7%)	87/375 (23.2%)	53/612 ( 8.7%)	86/391 (22.0%)	94/391 (24.0%)	81/523 (15.5%)	dg	57/469 (12.2%)	86/490 (17.6%)	24/649 ( 3.7%)	87/391 (22.3%)	65/405 (16.0%)	13/549 ( 2.4%)	77/431 (17.9%)	34/520 ( 6.5%)	54/403 (13.4%)	88/385 (22.9%)	34/520 ( 6.5%)	86/400 (21.5%)	63/411 (15.3%)	97/420 (23.1%)	52/724 ( 7.2%)	83/401 (20.7%)	102/387 (26.4%)	112/383 (29.2%)	70/395 (17.7%)	61/401 (15.2%)	72/760 ( 9.5%)	58/423 (13.7%)
EH26(32)	50/445 (11.2%)	66/430 (15.3%)	51/465 (11.0%)	69/389 (17.7%)	38/506 ( 7.5%)	54/414 (13.0%)	59/423 (13.9%)	30/599 ( 5.0%)	70/398 (17.6%)	63/407 (15.5%)	44/462 ( 9.5%)	43/436 ( 9.9%)	61/389 (15.7%)	42/481 ( 8.7%)	54/458 (11.8%)	36/471 ( 7.6%)	75/374 (20.1%)	84/350 (24.0%)	61/429 (14.2%)	65/341 (19.1%)	70/560 (12.5%)	48/481 (10.0%)	43/608 ( 7.1%)	55/441 (12.5%)	42/482 ( 8.7%)	66/513 (12.9%)	57/469 (12.2%)	dg	32/583 ( 5.5%)	74/447 (16.6%)	55/441 (12.5%)	44/344 (12.8%)	55/319 (17.2%)	79/361 (21.9%)	81/331 (24.5%)	44/334 (13.2%)	63/367 (17.2%)	82/331 (24.8%)	59/397 (14.9%)	72/341 (21.1%)	13/569 ( 2.3%)	54/581 ( 9.3%)	78/369 (21.1%)	32/465 ( 6.9%)	70/372 (18.8%)	60/355 (16.9%)	55/333 (16.5%)	70/706 ( 9.9%)	57/329 (17.3%)
EH27(32)	42/582 ( 7.2%)	49/578 ( 8.5%)	55/563 ( 9.8%)	46/579 ( 7.9%)	52/561 ( 9.3%)	26/625 ( 4.2%)	20/650 ( 3.1%)	180/414 (43.5%)	86/499 (17.2%)	80/498 (16.1%)	36/662 ( 5.4%)	47/577 ( 8.1%)	73/517 (14.1%)	63/519 (12.1%)	54/591 ( 9.1%)	59/489 (12.1%)	38/562 ( 6.8%)	59/510 (11.6%)	67/536 (12.5%)	35/556 ( 6.3%)	36/796 ( 4.5%)	36/597 ( 6.0%)	76/590 (12.9%)	53/550 ( 9.6%)	43/610 ( 7.0%)	107/472 (22.7%)	86/490 (17.6%)	32/583 ( 5.5%)	dg	51/619 ( 8.2%)	53/550 ( 9.6%)	56/456 (12.3%)	44/494 ( 8.9%)	44/575 ( 7.7%)	64/485 (13.2%)	36/502 ( 7.2%)	24/656 ( 3.7%)	64/485 (13.2%)	72/512 (14.1%)	38/529 ( 7.2%)	75/457 (16.4%)	36/788 ( 4.6%)	83/473 (17.5%)	71/481 (14.8%)	66/477 (13.8%)	51/524 ( 9.7%)	57/442 (12.9%)	56/859 ( 6.5%)	41/555 ( 7.4%)
EH28(31)	44/584 ( 7.5%)	75/493 (15.2%)	74/484 (15.3%)	77/467 (16.5%)	73/481 (15.2%)	80/467 (17.1%)	49/522 ( 9.4%)	36/684 ( 5.3%)	54/530 (10.2%)	52/541 ( 9.6%)	23/666 ( 3.5%)	57/488 (11.7%)	83/439 (18.9%)	67/527 (12.7%)	83/467 (17.8%)	74/421 (17.6%)	46/537 ( 8.6%)	70/427 (16.4%)	69/509 (13.6%)	68/422 (16.1%)	87/636 (13.7%)	70/455 (15.4%)	61/630 ( 9.7%)	68/485 (14.0%)	57/557 (10.2%)	75/560 (13.4%)	24/649 ( 3.7%)	70/427 (16.4%)	51/619 ( 8.2%)	dg	68/485 (14.0%)	58/420 (13.8%)	61/420 (14.5%)	65/508 (12.8%)	64/451 (14.2%)	53/444 (11.9%)	46/535 ( 8.6%)	65/451 (14.4%)	52/535 ( 9.7%)	79/405 (19.5%)	13/678 ( 1.9%)	95/596 (15.9%)	72/460 (15.7%)	70/431 (16.2%)	53/521 (10.2%)	36/522 ( 6.9%)	28/513 ( 5.5%)	79/751 (10.5%)	64/444 (14.4%)
EH29(31)	130/320 (40.6%)	125/349 (35.8%)	95/378 (25.1%)	38/476 ( 8.0%)	121/346 (35.0%)	133/316 (42.1%)	129/319 (40.4%)	72/502 (14.3%)	118/351 (33.6%)	140/320 (43.8%)	143/345 (41.4%)	151/315 (47.9%)	133/316 (42.1%)	152/348 (43.7%)	122/366 (33.3%)	100/363 (27.5%)	135/316 (42.7%)	64/425 (15.1%)	96/374 (25.7%)	56/406 (13.8%)	78/517 (15.1%)	121/323 (37.5%)	77/515 (15.0%)	311/313 (99.4%)	92/410 (22.4%)	67/495 (13.5%)	87/391 (22.3%)	55/441 (12.5%)	53/550 ( 9.6%)	68/485 (14.0%)	dg	54/358 (15.1%)	55/348 (15.8%)	39/498 ( 7.8%)	30/495 ( 6.1%)	52/354 (14.7%)	145/324 (44.8%)	30/495 ( 6.1%)	101/343 (29.4%)	55/366 (15.0%)	97/347 (28.0%)	80/583 (13.7%)	74/393 (18.8%)	93/338 (27.5%)	83/330 (25.2%)	61/387 (15.8%)	62/349 (17.8%)	8/919 ( 0.9%)	9/551 ( 1.6%)
EH30(30)	49/382 (12.8%)	44/389 (11.3%)	44/404 (10.9%)	47/379 (12.4%)	37/404 ( 9.2%)	58/338 (17.2%)	60/355 (16.9%)	48/485 ( 9.9%)	66/378 (17.5%)	54/384 (14.1%)	54/396 (13.6%)	56/346 (16.2%)	58/345 (16.8%)	69/363 (19.0%)	44/441 (10.0%)	51/334 (15.3%)	57/345 (16.5%)	47/355 (13.2%)	52/380 (13.7%)	57/318 (17.9%)	64/539 (11.9%)	51/395 (12.9%)	52/481 (10.8%)	50/357 (14.0%)	52/401 (13.0%)	60/439 (13.7%)	64/406 (15.8%)	44/344 (12.8%)	56/456 (12.3%)	58/420 (13.8%)	54/358 (15.1%)	dg	48/279 (17.2%)	50/360 (13.9%)	50/336 (14.9%)	76/224 (33.9%)	61/351 (17.4%)	50/336 (14.9%)	64/357 (17.9%)	51/320 (15.9%)	51/366 (13.9%)	56/539 (10.4%)	61/332 (18.4%)	43/331 (13.0%)	58/339 (17.1%)	60/315 (19.0%)	61/258 (23.6%)	57/695 ( 8.2%)	11/444 ( 2.5%)
EH31(29)	59/371 (15.9%)	55/365 (15.1%)	45/397 (11.3%)	27/488 ( 5.5%)	57/366 (15.6%)	62/356 (17.4%)	59/345 (17.1%)	50/482 (10.4%)	60/372 (16.1%)	66/351 (18.8%)	56/363 (15.4%)	14/509 ( 2.8%)	57/354 (16.1%)	14/521 ( 2.7%)	21/541 ( 3.9%)	57/339 (16.8%)	58/354 (16.4%)	70/316 (22.2%)	51/413 (12.3%)	64/325 (19.7%)	40/596 ( 6.7%)	35/434 ( 8.1%)	61/503 (12.1%)	54/348 (15.5%)	59/379 (15.6%)	33/547 ( 6.0%)	13/549 ( 2.4%)	55/319 (17.2%)	44/494 ( 8.9%)	61/420 (14.5%)	55/348 (15.8%)	48/279 (17.2%)	dg	67/349 (19.2%)	64/323 (19.8%)	53/283 (18.7%)	55/344 (16.0%)	64/323 (19.8%)	54/362 (14.9%)	65/316 (20.6%)	56/377 (14.9%)	62/555 (11.2%)	63/353 (17.8%)	50/306 (16.3%)	56/332 (16.9%)	61/341 (17.9%)	55/286 (19.2%)	57/681 ( 8.4%)	55/312 (17.6%)
EH32(29)	40/524 ( 7.6%)	27/556 ( 4.9%)	61/421 (14.5%)	26/556 ( 4.7%)	48/493 ( 9.7%)	32/518 ( 6.2%)	51/432 (11.8%)	7/695 ( 1.0%)	41/510 ( 8.0%)	67/396 (16.9%)	36/528 ( 6.8%)	39/496 ( 7.9%)	29/532 ( 5.5%)	77/391 (19.7%)	49/518 ( 9.5%)	66/423 (15.6%)	30/518 ( 5.8%)	66/343 (19.2%)	70/429 (16.3%)	18/545 ( 3.3%)	69/586 (11.8%)	10/560 ( 1.8%)	68/552 (12.3%)	39/498 ( 7.8%)	53/469 (11.3%)	63/537 (11.7%)	77/431 (17.9%)	79/361 (21.9%)	44/575 ( 7.7%)	65/508 (12.8%)	39/498 ( 7.8%)	50/360 (13.9%)	67/349 (19.2%)	dg	64/381 (16.8%)	42/368 (11.4%)	69/408 (16.9%)	63/376 (16.8%)	61/470 (13.0%)	66/333 (19.8%)	74/404 (18.3%)	64/579 (11.1%)	35/499 ( 7.0%)	59/396 (14.9%)	63/377 (16.7%)	52/417 (12.5%)	51/387 (13.2%)	77/707 (10.9%)	22/496 ( 4.4%)
EH33(29)	66/377 (17.5%)	21/554 ( 3.8%)	51/451 (11.3%)	50/386 (13.0%)	68/402 (16.9%)	64/368 (17.4%)	72/370 (19.5%)	31/562 ( 5.5%)	33/487 ( 6.8%)	28/491 ( 5.7%)	71/417 (17.0%)	66/398 (16.6%)	65/368 (17.7%)	65/429 (15.2%)	69/405 (17.0%)	50/389 (12.9%)	44/460 ( 9.6%)	185/283 (65.4%)	64/418 (15.3%)	103/299 (34.4%)	70/520 (13.5%)	64/367 (17.4%)	66/546 (12.1%)	30/495 ( 6.1%)	53/459 (11.5%)	38/553 ( 6.9%)	34/520 ( 6.5%)	82/329 (24.9%)	64/485 (13.2%)	64/451 (14.2%)	30/495 ( 6.1%)	50/336 (14.9%)	64/323 (19.8%)	64/381 (16.8%)	dg	47/341 (13.8%)	27/486 ( 5.6%)	275/276 (99.6%)	70/408 (17.2%)	95/281 (33.8%)	16/542 ( 3.0%)	56/585 ( 9.6%)	64/377 (17.0%)	62/350 (17.7%)	56/376 (14.9%)	52/350 (14.9%)	33/409 ( 8.1%)	56/699 ( 8.0%)	75/291 (25.8%)
EH34(29)	40/410 ( 9.8%)	49/411 (11.9%)	56/371 (15.1%)	36/421 ( 8.6%)	60/359 (16.7%)	63/360 (17.5%)	47/376 (12.5%)	29/522 ( 5.6%)	47/395 (11.9%)	42/408 (10.3%)	62/365 (17.0%)	58/336 (17.3%)	61/354 (17.2%)	43/380 (11.3%)	48/384 (12.5%)	57/318 (17.9%)	60/360 (16.7%)	46/348 (13.2%)	62/385 (16.1%)	48/339 (14.2%)	57/564 (10.1%)	34/412 ( 8.3%)	56/486 (11.5%)	52/354 (14.7%)	58/359 (16.2%)	40/502 ( 8.0%)	54/403 (13.4%)	44/334 (13.2%)	36/502 ( 7.2%)	53/444 (11.9%)	52/354 (14.7%)	76/224 (33.9%)	53/283 (18.7%)	42/368 (11.4%)	45/342 (13.2%)	dg	35/403 ( 8.7%)	45/342 (13.2%)	51/360 (14.2%)	59/323 (18.3%)	52/348 (14.9%)	53/540 ( 9.8%)	55/358 (15.4%)	57/332 (17.2%)	54/353 (15.3%)	60/308 (19.5%)	31/339 ( 9.1%)	28/766 ( 3.7%)	53/312 (17.0%)
EH35(29)	135/328 (41.2%)	123/345 (35.7%)	93/375 (24.8%)	47/489 ( 9.6%)	124/347 (35.7%)	135/316 (42.7%)	156/315 (49.5%)	66/530 (12.5%)	120/355 (33.8%)	130/327 (39.8%)	138/342 (40.4%)	127/322 (39.4%)	134/316 (42.4%)	150/330 (45.5%)	114/374 (30.5%)	84/336 (25.0%)	134/316 (42.4%)	57/424 (13.4%)	97/378 (25.7%)	44/465 ( 9.5%)	83/585 (14.2%)	115/341 (33.7%)	83/499 (16.6%)	143/324 (44.1%)	79/384 (20.6%)	51/567 ( 9.0%)	88/385 (22.9%)	63/367 (17.2%)	24/656 ( 3.7%)	46/535 ( 8.6%)	145/324 (44.8%)	61/351 (17.4%)	55/344 (16.0%)	65/428 (15.2%)	27/486 ( 5.6%)	35/403 ( 8.7%)	dg	27/486 ( 5.6%)	105/355 (29.6%)	41/437 ( 9.4%)	87/369 (23.6%)	72/595 (12.1%)	69/367 (18.8%)	82/327 (25.1%)	86/323 (26.6%)	20/502 ( 4.0%)	59/332 (17.8%)	2/941 ( 0.2%)	9/555 ( 1.6%)
EH36(28)	66/377 (17.5%)	21/554 ( 3.8%)	51/451 (11.3%)	49/386 (12.7%)	68/402 (16.9%)	65/368 (17.7%)	72/370 (19.5%)	32/562 ( 5.7%)	33/487 ( 6.8%)	28/491 ( 5.7%)	72/417 (17.3%)	66/398 (16.6%)	66/368 (17.9%)	65/429 (15.2%)	69/405 (17.0%)	50/389 (12.9%)	44/460 ( 9.6%)	185/283 (65.4%)	64/418 (15.3%)	102/299 (34.1%)	70/520 (13.5%)	64/367 (17.4%)	66/546 (12.1%)	30/495 ( 6.1%)	53/459 (11.5%)	38/553 ( 6.9%)	34/520 ( 6.5%)	82/331 (24.8%)	64/485 (13.2%)	65/451 (14.4%)	30/495 ( 6.1%)	50/336 (14.9%)	64/323 (19.8%)	63/376 (16.8%)	275/276 (99.6%)	47/341 (13.8%)	27/486 ( 5.6%)	dg	71/408 (17.4%)	94/281 (33.5%)	16/542 ( 3.0%)	58/585 ( 9.9%)	58/388 (14.9%)	62/350 (17.7%)	56/376 (14.9%)	52/350 (14.9%)	33/409 ( 8.1%)	56/699 ( 8.0%)	74/291 (25.4%)
EH37(28)	91/385 (23.6%)	95/362 (26.2%)	88/383 (23.0%)	47/492 ( 9.6%)	99/364 (27.2%)	97/351 (27.6%)	96/344 (27.9%)	16/702 ( 2.3%)	88/389 (22.6%)	100/358 (27.9%)	99/393 (25.2%)	101/333 (30.3%)	97/348 (27.9%)	114/361 (31.6%)	85/400 (21.2%)	91/326 (27.9%)	95/347 (27.4%)	64/382 (16.8%)	102/396 (25.8%)	19/549 ( 3.5%)	97/548 (17.7%)	92/360 (25.6%)	49/652 ( 7.5%)	102/343 (29.7%)	89/395 (22.5%)	70/512 (13.7%)	86/400 (21.5%)	59/397 (14.9%)	72/512 (14.1%)	52/535 ( 9.7%)	101/343 (29.4%)	64/357 (17.9%)	54/362 (14.9%)	61/470 (13.0%)	70/408 (17.2%)	51/360 (14.2%)	105/355 (29.6%)	71/408 (17.4%)	dg	42/473 ( 8.9%)	91/351 (25.9%)	79/560 (14.1%)	75/384 (19.5%)	97/343 (28.3%)	90/340 (26.5%)	62/376 (16.5%)	55/378 (14.6%)	67/738 ( 9.1%)	58/377 (15.4%)
EH38(28)	19/545 ( 3.5%)	55/383 (14.4%)	62/429 (14.5%)	53/435 (12.2%)	60/403 (14.9%)	61/374 (16.3%)	63/377 (16.7%)	41/527 ( 7.8%)	55/440 (12.5%)	52/402 (12.9%)	64/415 (15.4%)	26/507 ( 5.1%)	51/372 (13.7%)	32/519 ( 6.2%)	56/420 (13.3%)	55/382 (14.4%)	58/369 (15.7%)	100/289 (34.6%)	67/401 (16.7%)	96/299 (32.1%)	52/597 ( 8.7%)	60/386 (15.5%)	54/538 (10.0%)	55/366 (15.0%)	49/429 (11.4%)	61/453 (13.5%)	63/411 (15.3%)	72/341 (21.1%)	38/529 ( 7.2%)	79/405 (19.5%)	55/366 (15.0%)	51/320 (15.9%)	65/316 (20.6%)	67/341 (19.6%)	95/281 (33.8%)	59/323 (18.3%)	41/437 ( 9.4%)	94/281 (33.5%)	42/473 ( 8.9%)	dg	50/399 (12.5%)	28/663 ( 4.2%)	62/361 (17.2%)	68/327 (20.8%)	55/343 (16.0%)	61/345 (17.7%)	43/340 (12.6%)	62/705 ( 8.8%)	67/305 (22.0%)
EH39(28)	87/358 (24.3%)	97/373 (26.0%)	77/401 (19.2%)	38/493 ( 7.7%)	93/380 (24.5%)	82/368 (22.3%)	97/362 (26.8%)	86/497 (17.3%)	91/391 (23.3%)	89/368 (24.2%)	90/377 (23.9%)	91/363 (25.1%)	90/345 (26.1%)	92/369 (24.9%)	89/389 (22.9%)	100/324 (30.9%)	93/342 (27.2%)	63/393 (16.0%)	78/383 (20.4%)	35/507 ( 6.9%)	81/597 (13.6%)	82/351 (23.4%)	71/529 (13.4%)	97/347 (28.0%)	81/386 (21.0%)	43/599 ( 7.2%)	97/420 (23.1%)	13/569 ( 2.3%)	75/457 (16.4%)	13/678 ( 1.9%)	97/347 (28.0%)	51/366 (13.9%)	59/379 (15.6%)	74/404 (18.3%)	16/542 ( 3.0%)	52/348 (14.9%)	87/369 (23.6%)	16/542 ( 3.0%)	91/351 (25.9%)	50/397 (12.6%)	dg	43/679 ( 6.3%)	66/379 (17.4%)	96/325 (29.5%)	107/344 (31.1%)	57/388 (14.7%)	17/473 ( 3.6%)	73/712 (10.3%)	54/377 (14.3%)
EH40(27)	63/565 (11.2%)	12/793 ( 1.5%)	71/588 (12.1%)	82/537 (15.3%)	73/587 (12.4%)	69/593 (11.6%)	65/584 (11.1%)	97/619 (15.7%)	85/557 (15.3%)	89/566 (15.7%)	63/611 (10.3%)	65/596 (10.9%)	67/610 (11.0%)	74/580 (12.8%)	58/649 ( 8.9%)	69/565 (12.2%)	65/630 (10.3%)	66/558 (11.8%)	52/634 ( 8.2%)	43/600 ( 7.2%)	90/677 (13.3%)	66/603 (10.9%)	105/624 (16.8%)	78/586 (13.3%)	93/586 (15.9%)	92/572 (16.1%)	52/724 ( 7.2%)	54/581 ( 9.3%)	36/788 ( 4.6%)	95/596 (15.9%)	80/583 (13.7%)	56/539 (10.4%)	62/555 (11.2%)	64/579 (11.1%)	56/585 ( 9.6%)	53/540 ( 9.8%)	72/595 (12.1%)	58/585 ( 9.9%)	79/560 (14.1%)	28/666 ( 4.2%)	43/679 ( 6.3%)	dg	71/585 (12.1%)	68/565 (12.0%)	80/536 (14.9%)	51/613 ( 8.3%)	42/555 ( 7.6%)	96/751 (12.8%)	60/561 (10.7%)
EH41(27)	75/403 (18.6%)	77/433 (17.8%)	79/392 (20.2%)	68/396 (17.2%)	79/401 (19.7%)	68/384 (17.7%)	77/365 (21.1%)	65/523 (12.4%)	71/399 (17.8%)	70/398 (17.6%)	76/384 (19.8%)	80/365 (21.9%)	64/393 (16.3%)	82/362 (22.7%)	71/420 (16.9%)	70/378 (18.5%)	62/400 (15.5%)	59/401 (14.7%)	66/409 (16.1%)	64/368 (17.4%)	76/560 (13.6%)	64/389 (16.5%)	90/511 (17.6%)	72/393 (18.3%)	70/400 (17.5%)	78/477 (16.4%)	83/401 (20.7%)	78/369 (21.1%)	83/473 (17.5%)	72/460 (15.7%)	74/393 (18.8%)	61/332 (18.4%)	63/353 (17.8%)	35/499 ( 7.0%)	64/377 (17.0%)	55/358 (15.4%)	69/367 (18.8%)	58/388 (14.9%)	75/382 (19.6%)	62/361 (17.2%)	66/379 (17.4%)	71/585 (12.1%)	dg	52/348 (14.9%)	66/403 (16.4%)	57/364 (15.7%)	68/336 (20.2%)	57/750 ( 7.6%)	58/358 (16.2%)
EH42(27)	88/323 (27.2%)	80/349 (22.9%)	73/400 (18.2%)	31/503 ( 6.2%)	80/347 (23.1%)	81/334 (24.3%)	87/347 (25.1%)	68/466 (14.6%)	82/360 (22.8%)	81/336 (24.1%)	68/376 (18.1%)	88/337 (26.1%)	80/327 (24.5%)	82/336 (24.4%)	85/389 (21.9%)	110/313 (35.1%)	84/336 (25.0%)	64/333 (19.2%)	77/356 (21.6%)	68/322 (21.1%)	63/563 (11.2%)	73/360 (20.3%)	67/507 (13.2%)	93/338 (27.5%)	87/382 (22.8%)	47/535 ( 8.8%)	102/387 (26.4%)	32/465 ( 6.9%)	71/481 (14.8%)	70/431 (16.2%)	93/338 (27.5%)	43/331 (13.0%)	50/306 (16.3%)	59/396 (14.9%)	62/350 (17.7%)	57/330 (17.3%)	82/327 (25.1%)	62/350 (17.7%)	97/343 (28.3%)	65/339 (19.2%)	96/325 (29.5%)	68/565 (12.0%)	52/348 (14.9%)	dg	101/303 (33.3%)	59/358 (16.5%)	50/353 (14.2%)	3/910 ( 0.3%)	56/337 (16.6%)
EH43(27)	96/345 (27.8%)	90/353 (25.5%)	87/364 (23.9%)	43/462 ( 9.3%)	81/346 (23.4%)	101/353 (28.6%)	89/317 (28.1%)	68/486 (14.0%)	102/368 (27.7%)	95/332 (28.6%)	90/350 (25.7%)	90/326 (27.6%)	94/337 (27.9%)	96/347 (27.7%)	93/368 (25.3%)	120/298 (40.3%)	98/325 (30.2%)	63/350 (18.0%)	86/378 (22.8%)	64/358 (17.9%)	68/544 (12.5%)	87/354 (24.6%)	64/539 (11.9%)	83/330 (25.2%)	88/376 (23.4%)	46/570 ( 8.1%)	112/383 (29.2%)	70/372 (18.8%)	66/477 (13.8%)	53/521 (10.2%)	83/330 (25.2%)	58/339 (17.1%)	56/332 (16.9%)	63/377 (16.7%)	56/376 (14.9%)	54/353 (15.3%)	86/323 (26.6%)	56/376 (14.9%)	90/340 (26.5%)	55/343 (16.0%)	107/344 (31.1%)	81/538 (15.1%)	66/403 (16.4%)	101/303 (33.3%)	dg	60/362 (16.6%)	48/338 (14.2%)	47/698 ( 6.7%)	52/339 (15.3%)
EH44(25)	61/358 (17.0%)	5/586 ( 0.9%)	67/400 (16.8%)	31/477 ( 6.5%)	5/587 ( 0.9%)	56/405 (13.8%)	61/352 (17.3%)	44/535 ( 8.2%)	33/507 ( 6.5%)	64/390 (16.4%)	62/405 (15.3%)	47/381 (12.3%)	61/365 (16.7%)	32/487 ( 6.6%)	23/556 ( 4.1%)	62/355 (17.5%)	50/398 (12.6%)	61/359 (17.0%)	66/415 (15.9%)	54/384 (14.1%)	52/584 ( 8.9%)	3/557 ( 0.5%)	8/695 ( 1.2%)	61/387 (15.8%)	56/404 (13.9%)	59/486 (12.1%)	70/395 (17.7%)	60/352 (17.0%)	51/524 ( 9.7%)	36/522 ( 6.9%)	61/387 (15.8%)	60/315 (19.0%)	61/341 (17.9%)	52/417 (12.5%)	52/350 (14.9%)	59/312 (18.9%)	20/502 ( 4.0%)	52/350 (14.9%)	62/376 (16.5%)	61/345 (17.7%)	57/387 (14.7%)	51/613 ( 8.3%)	57/364 (15.7%)	59/358 (16.5%)	60/362 (16.6%)	dg	58/312 (18.6%)	55/677 ( 8.1%)	47/329 (14.3%)
EH45(24)	52/375 (13.9%)	55/371 (14.8%)	60/378 (15.9%)	46/402 (11.4%)	44/439 (10.0%)	59/366 (16.1%)	56/365 (15.3%)	45/453 ( 9.9%)	54/395 (13.7%)	67/369 (18.2%)	58/401 (14.5%)	57/361 (15.8%)	47/366 (12.8%)	56/375 (14.9%)	59/386 (15.3%)	58/346 (16.8%)	55/342 (16.1%)	39/371 (10.5%)	60/365 (16.4%)	54/323 (16.7%)	60/520 (11.5%)	20/480 ( 4.2%)	54/498 (10.8%)	56/355 (15.8%)	43/401 (10.7%)	32/535 ( 6.0%)	61/401 (15.2%)	55/333 (16.5%)	57/442 (12.9%)	28/513 ( 5.5%)	62/349 (17.8%)	61/258 (23.6%)	56/273 (20.5%)	51/387 (13.2%)	33/409 ( 8.1%)	31/339 ( 9.1%)	59/332 (17.8%)	33/409 ( 8.1%)	55/378 (14.6%)	43/340 (12.6%)	17/473 ( 3.6%)	42/555 ( 7.6%)	68/337 (20.2%)	50/353 (14.2%)	48/338 (14.2%)	58/312 (18.6%)	dg	32/750 ( 4.3%)	49/322 (15.2%)
EH46(23)	75/714 (10.5%)	47/808 ( 5.8%)	63/770 ( 8.2%)	29/849 ( 3.4%)	53/824 ( 6.4%)	66/694 ( 9.5%)	12/902 ( 1.3%)	82/765 (10.7%)	20/920 ( 2.2%)	63/747 ( 8.4%)	67/719 ( 9.3%)	3/940 ( 0.3%)	64/698 ( 9.2%)	78/683 (11.4%)	16/962 ( 1.7%)	76/666 (11.4%)	36/798 ( 4.5%)	74/675 (11.0%)	69/744 ( 9.3%)	65/719 ( 9.0%)	53/947 ( 5.6%)	11/902 ( 1.2%)	92/806 (11.4%)	8/919 ( 0.9%)	91/707 (12.9%)	40/900 ( 4.4%)	72/760 ( 9.5%)	70/706 ( 9.9%)	56/859 ( 6.5%)	79/751 (10.5%)	8/919 ( 0.9%)	57/695 ( 8.2%)	57/681 ( 8.4%)	77/707 (10.9%)	56/699 ( 8.0%)	28/766 ( 3.7%)	2/941 ( 0.2%)	56/699 ( 8.0%)	67/738 ( 9.1%)	62/705 ( 8.8%)	73/712 (10.3%)	96/751 (12.8%)	57/750 ( 7.6%)	3/910 ( 0.3%)	47/698 ( 6.7%)	55/677 ( 8.1%)	32/750 ( 4.3%)	dg	55/722 ( 7.6%)
EH47(23)	22/499 ( 4.4%)	50/406 (12.3%)	56/405 (13.8%)	54/417 (12.9%)	65/397 (16.4%)	58/380 (15.3%)	42/425 ( 9.9%)	31/560 ( 5.5%)	31/483 ( 6.4%)	55/368 (14.9%)	52/423 (12.3%)	11/542 ( 2.0%)	65/355 (18.3%)	51/416 (12.3%)	47/427 (11.0%)	63/351 (17.9%)	57/377 (15.1%)	69/308 (22.4%)	66/410 (16.1%)	72/318 (22.6%)	65/505 (12.9%)	33/485 ( 6.8%)	51/513 ( 9.9%)	9/551 ( 1.6%)	56/419 (13.4%)	36/553 ( 6.5%)	58/423 (13.7%)	57/329 (17.3%)	41/555 ( 7.4%)	64/444 (14.4%)	9/551 ( 1.6%)	11/444 ( 2.5%)	55/312 (17.6%)	22/496 ( 4.4%)	75/291 (25.8%)	53/312 (17.0%)	9/555 ( 1.6%)	74/291 (25.4%)	58/377 (15.4%)	67/305 (22.0%)	54/377 (14.3%)	60/561 (10.7%)	58/358 (16.2%)	56/337 (16.6%)	52/339 (15.3%)	47/329 (14.3%)	49/322 (15.2%)	55/722 ( 7.6%)	dg
EH48(23)	97/342 (28.4%)	90/368 (24.5%)	83/362 (22.9%)	66/396 (16.7%)	96/365 (26.3%)	96/345 (27.8%)	93/340 (27.4%)	51/545 ( 9.4%)	102/374 (27.3%)	101/356 (28.4%)	86/357 (24.1%)	100/342 (29.2%)	86/357 (24.1%)	118/350 (33.7%)	84/379 (22.2%)	127/303 (41.9%)	97/345 (28.1%)	61/394 (15.5%)	91/359 (25.3%)	55/383 (14.4%)	98/543 (18.0%)	91/348 (26.1%)	81/519 (15.6%)	94/327 (28.7%)	93/383 (24.3%)	76/473 (16.1%)	112/384 (29.2%)	65/372 (17.5%)	75/485 (15.5%)	81/426 (19.0%)	94/327 (28.7%)	57/356 (16.0%)	60/346 (17.3%)	58/425 (13.6%)	62/374 (16.6%)	59/341 (17.3%)	99/333 (29.7%)	62/374 (16.6%)	94/344 (27.3%)	63/354 (17.8%)	109/343 (31.8%)	67/561 (11.9%)	73/357 (20.4%)	101/319 (31.7%)	140/308 (45.5%)	68/356 (19.1%)	45/370 (12.2%)	61/702 ( 8.7%)	55/371 (14.8%)
EH49(23)	31/457 ( 6.8%)	23/503 ( 4.6%)	59/398 (14.8%)	50/369 (13.6%)	12/525 ( 2.3%)	7/534 ( 1.3%)	44/369 (11.9%)	50/497 (10.1%)	54/412 (13.1%)	6/542 ( 1.1%)	37/455 ( 8.1%)	6/519 ( 1.2%)	22/469 ( 4.7%)	46/421 (10.9%)	44/459 ( 9.6%)	43/393 (10.9%)	8/534 ( 1.5%)	63/295 (21.4%)	8/558 ( 1.4%)	53/311 (17.0%)	54/558 ( 9.7%)	53/368 (14.4%)	54/529 (10.2%)	39/406 ( 9.6%)	48/410 (11.7%)	4/636 ( 0.6%)	12/547 ( 2.2%)	59/312 (18.9%)	65/439 (14.8%)	44/423 (10.4%)	39/406 ( 9.6%)	52/292 (17.8%)	65/283 (23.0%)	47/360 (13.1%)	62/293 (21.2%)	60/277 (21.7%)	64/336 (19.0%)	63/293 (21.5%)	45/372 (12.1%)	53/307 (17.3%)	9/518 ( 1.7%)	53/557 ( 9.5%)	52/342 (15.2%)	29/412 ( 7.0%)	58/334 (17.4%)	59/304 (19.4%)	55/274 (20.1%)	35/744 ( 4.7%)	56/322 (17.4%)
EH50(22)	64/391 (16.4%)	66/379 (17.4%)	69/403 (17.1%)	53/389 (13.6%)	61/402 (15.2%)	62/374 (16.6%)	59/383 (15.4%)	32/575 ( 5.6%)	59/419 (14.1%)	49/426 (11.5%)	52/461 (11.3%)	59/385 (15.3%)	63/366 (17.2%)	60/423 (14.2%)	64/400 (16.0%)	53/375 (14.1%)	65/372 (17.5%)	99/293 (33.8%)	73/390 (18.7%)	86/303 (28.4%)	60/551 (10.9%)	42/428 ( 9.8%)	64/534 (12.0%)	61/402 (15.2%)	66/402 (16.4%)	46/564 ( 8.2%)	57/450 (12.7%)	72/325 (22.2%)	43/536 ( 8.0%)	63/438 (14.4%)	61/402 (15.2%)	59/306 (19.3%)	61/310 (19.7%)	69/344 (20.1%)	94/289 (32.5%)	59/317 (18.6%)	61/365 (16.7%)	95/289 (32.9%)	62/370 (16.8%)	183/278 (65.8%)	3/590 ( 0.5%)	64/575 (11.1%)	60/379 (15.8%)	64/329 (19.5%)	62/360 (17.2%)	68/325 (20.9%)	46/351 (13.1%)	55/744 ( 7.4%)	65/320 (20.3%)
EH51(22)	71/697 (10.2%)	74/735 (10.1%)	73/720 (10.1%)	84/681 (12.3%)	63/785 ( 8.0%)	79/679 (11.6%)	85/662 (12.8%)	60/856 ( 7.0%)	67/690 ( 9.7%)	81/681 (11.9%)	83/697 (11.9%)	71/695 (10.2%)	79/682 (11.6%)	89/693 (12.8%)	64/759 ( 8.4%)	64/694 ( 9.2%)	81/679 (11.9%)	65/681 ( 9.5%)	54/764 ( 7.1%)	38/740 ( 5.1%)	77/820 ( 9.4%)	18/859 ( 2.1%)	110/737 (14.9%)	68/708 ( 9.6%)	68/742 ( 9.2%)	52/839 ( 6.2%)	71/717 ( 9.9%)	78/670 (11.6%)	109/686 (15.9%)	97/668 (14.5%)	85/672 (12.6%)	58/693 ( 8.4%)	56/670 ( 8.4%)	59/722 ( 8.2%)	68/683 (10.0%)	58/643 ( 9.0%)	61/774 ( 7.9%)	68/683 (10.0%)	79/711 (11.1%)	47/711 ( 6.6%)	78/695 (11.2%)	118/719 (16.4%)	46/790 ( 5.8%)	62/688 ( 9.0%)	71/676 (10.5%)	37/774 ( 4.8%)	46/684 ( 6.7%)	95/958 ( 9.9%)	29/796 ( 3.6%)
EH52(21)	83/341 (24.3%)	97/351 (27.6%)	83/382 (21.7%)	41/489 ( 8.4%)	93/352 (26.4%)	85/339 (25.1%)	85/321 (26.5%)	46/515 ( 8.9%)	95/350 (27.1%)	88/349 (25.2%)	75/349 (21.5%)	88/351 (25.1%)	86/349 (24.6%)	96/357 (26.9%)	88/370 (23.8%)	117/301 (38.9%)	88/340 (25.9%)	54/379 (14.2%)	82/374 (21.9%)	66/362 (18.2%)	73/557 (13.1%)	84/319 (26.3%)	69/521 (13.2%)	98/341 (28.7%)	93/359 (25.9%)	38/572 ( 6.6%)	103/379 (27.2%)	63/386 (16.3%)	26/593 ( 4.4%)	80/415 (19.3%)	98/341 (28.7%)	54/347 (15.6%)	57/361 (15.8%)	52/432 (12.0%)	55/380 (14.5%)	55/347 (15.9%)	79/355 (22.3%)	55/380 (14.5%)	90/362 (24.9%)	54/348 (15.5%)	114/327 (34.9%)	57/580 ( 9.8%)	73/367 (19.9%)	104/305 (34.1%)	118/300 (39.3%)	65/330 (19.7%)	55/332 (16.6%)	65/719 ( 9.0%)	66/339 (19.5%)
EH53(21)	27/507 ( 5.3%)	57/437 (13.0%)	54/415 (13.0%)	69/376 (18.4%)	42/438 ( 9.6%)	57/406 (14.0%)	58/392 (14.8%)	57/513 (11.1%)	36/490 ( 7.3%)	42/479 ( 8.8%)	62/394 (15.7%)	61/378 (16.1%)	59/407 (14.5%)	69/372 (18.5%)	64/442 (14.5%)	41/429 ( 9.6%)	56/424 (13.2%)	60/338 (17.8%)	48/456 (10.5%)	61/317 (19.2%)	34/647 ( 5.3%)	26/499 ( 5.2%)	58/533 (10.9%)	58/412 (14.1%)	57/406 (14.0%)	60/463 (13.0%)	58/466 (12.4%)	67/340 (19.7%)	64/465 (13.8%)	64/454 (14.1%)	55/400 (13.8%)	52/332 (15.7%)	56/291 (19.2%)	68/357 (19.0%)	59/345 (17.1%)	20/451 ( 4.4%)	64/379 (16.9%)	58/345 (16.8%)	36/498 ( 7.2%)	54/314 (17.2%)	63/380 (16.6%)	80/534 (15.0%)	49/433 (11.3%)	33/440 ( 7.5%)	60/354 (16.9%)	36/409 ( 8.8%)	20/457 ( 4.4%)	19/857 ( 2.2%)	62/332 (18.7%)
EH54(21)	131/348 (37.6%)	129/368 (35.1%)	104/401 (25.9%)	40/529 ( 7.6%)	131/378 (34.7%)	129/345 (37.4%)	125/348 (35.9%)	41/601 ( 6.8%)	121/373 (32.4%)	138/345 (40.0%)	134/361 (37.1%)	129/349 (37.0%)	130/345 (37.7%)	144/353 (40.8%)	112/382 (29.3%)	93/364 (25.5%)	133/345 (38.6%)	58/432 (13.4%)	93/398 (23.4%)	49/424 (11.6%)	95/550 (17.3%)	122/366 (33.3%)	59/614 ( 9.6%)	135/347 (38.9%)	76/411 (18.5%)	47/564 ( 8.3%)	94/396 (23.7%)	59/429 (13.8%)	26/669 ( 3.9%)	76/456 (16.7%)	136/347 (39.2%)	55/389 (14.1%)	52/376 (13.8%)	40/525 ( 7.6%)	56/400 (14.0%)	48/409 (11.7%)	148/348 (42.5%)	56/400 (14.0%)	107/384 (27.9%)	67/394 (17.0%)	94/380 (24.7%)	62/657 ( 9.4%)	78/409 (19.1%)	82/369 (22.2%)	100/358 (27.9%)	46/468 ( 9.8%)	31/475 ( 6.5%)	51/832 ( 6.1%)	63/384 (16.4%)
EH55(21)	61/398 (15.3%)	68/406 (16.7%)	68/440 (15.5%)	58/443 (13.1%)	38/542 ( 7.0%)	51/454 (11.2%)	59/419 (14.1%)	56/540 (10.4%)	79/423 (18.7%)	33/505 ( 6.5%)	62/448 (13.8%)	71/382 (18.6%)	68/418 (16.3%)	32/546 ( 5.9%)	67/457 (14.7%)	77/373 (20.6%)	55/431 (12.8%)	73/352 (20.7%)	81/422 (19.2%)	68/340 (20.0%)	68/571 (11.9%)	31/541 ( 5.7%)	79/536 (14.7%)	65/408 (15.9%)	73/416 (17.5%)	57/543 (10.5%)	70/408 (17.2%)	66/344 (19.2%)	75/478 (15.7%)	80/431 (18.6%)	65/408 (15.9%)	44/374 (11.8%)	65/375 (17.3%)	77/380 (20.3%)	74/334 (22.2%)	54/363 (14.9%)	62/379 (16.4%)	75/334 (22.5%)	74/393 (18.8%)	76/342 (22.2%)	62/370 (16.8%)	66/572 (11.5%)	69/382 (18.1%)	62/400 (15.5%)	71/361 (19.7%)	61/382 (16.0%)	50/361 (13.9%)	65/707 ( 9.2%)	66/349 (18.9%)
EH56(21)	72/388 (18.6%)	50/456 (11.0%)	64/420 (15.2%)	59/427 (13.8%)	39/530 ( 7.4%)	53/450 (11.8%)	44/473 ( 9.3%)	43/557 ( 7.7%)	76/404 (18.8%)	82/389 (21.1%)	75/392 (19.1%)	64/400 (16.0%)	65/379 (17.2%)	74/397 (18.6%)	65/400 (16.2%)	64/345 (18.6%)	66/398 (16.6%)	76/353 (21.5%)	38/532 ( 7.1%)	90/325 (27.7%)	65/596 (10.9%)	65/385 (16.9%)	59/589 (10.0%)	62/391 (15.9%)	63/422 (14.9%)	9/701 ( 1.3%)	71/423 (16.8%)	92/337 (27.3%)	49/566 ( 8.7%)	86/418 (20.6%)	62/391 (15.9%)	58/351 (16.5%)	60/353 (17.0%)	87/375 (23.2%)	73/339 (21.5%)	52/369 (14.1%)	28/542 ( 5.2%)	72/339 (21.2%)	66/417 (15.8%)	79/334 (23.7%)	76/394 (19.3%)	70/578 (12.1%)	63/404 (15.6%)	17/522 ( 3.3%)	77/367 (21.0%)	63/367 (17.2%)	51/354 (14.4%)	65/712 ( 9.1%)	69/326 (21.2%)
EH57(21)	71/432 (16.4%)	67/452 (14.8%)	56/439 (12.8%)	43/472 ( 9.1%)	73/433 (16.9%)	70/368 (19.0%)	65/405 (16.0%)	76/490 (15.5%)	76/426 (17.8%)	75/406 (18.5%)	74/431 (17.2%)	64/422 (15.2%)	76/367 (20.7%)	73/406 (18.0%)	61/478 (12.8%)	42/460 ( 9.1%)	76/376 (20.2%)	76/357 (21.3%)	64/457 (14.0%)	60/388 (15.5%)	71/555 (12.8%)	58/390 (14.9%)	66/549 (12.0%)	56/456 (12.3%)	53/479 (11.1%)	76/506 (15.0%)	8/642 ( 1.2%)	70/352 (19.9%)	67/536 (12.5%)	72/462 (15.6%)	60/405 (14.8%)	47/373 (12.6%)	56/363 (15.4%)	69/368 (18.8%)	78/341 (22.9%)	43/375 (11.5%)	73/409 (17.8%)	78/341 (22.9%)	41/508 ( 8.1%)	65/338 (19.2%)	45/462 ( 9.7%)	61/596 (10.2%)	41/496 ( 8.3%)	72/385 (18.7%)	30/494 ( 6.1%)	60/390 (15.4%)	58/360 (16.1%)	64/753 ( 8.5%)	55/358 (15.4%)
EH58(21)	68/366 (18.6%)	64/453 (14.1%)	67/404 (16.6%)	65/352 (18.5%)	73/408 (17.9%)	66/380 (17.4%)	68/349 (19.5%)	51/525 ( 9.7%)	63/421 (15.0%)	68/367 (18.5%)	50/445 (11.2%)	70/374 (18.7%)	62/376 (16.5%)	73/370 (19.7%)	40/531 ( 7.5%)	72/380 (18.9%)	64/377 (17.0%)	68/312 (21.8%)	67/386 (17.4%)	70/307 (22.8%)	65/584 (11.1%)	67/355 (18.9%)	67/540 (12.4%)	64/401 (16.0%)	64/417 (15.3%)	48/535 ( 9.0%)	72/400 (18.0%)	66/326 (20.2%)	22/597 ( 3.7%)	67/457 (14.7%)	73/367 (19.9%)	54/314 (17.2%)	60/312 (19.2%)	79/355 (22.3%)	73/306 (23.9%)	47/324 (14.5%)	64/378 (16.9%)	72/306 (23.5%)	60/413 (14.5%)	71/311 (22.8%)	79/368 (21.5%)	55/566 ( 9.7%)	65/335 (19.4%)	71/357 (19.9%)	52/389 (13.4%)	56/366 (15.3%)	64/303 (21.1%)	66/674 ( 9.8%)	67/315 (21.3%)
EH59(21)	65/354 (18.4%)	59/397 (14.9%)	64/385 (16.6%)	58/349 (16.6%)	56/399 (14.0%)	62/356 (17.4%)	55/381 (14.4%)	46/499 ( 9.2%)	56/374 (15.0%)	54/379 (14.2%)	37/438 ( 8.4%)	54/369 (14.6%)	62/366 (16.9%)	71/359 (19.8%)	49/398 (12.3%)	50/321 (15.6%)	54/371 (14.6%)	40/342 (11.7%)	58/385 (15.1%)	56/333 (16.8%)	63/562 (11.2%)	65/344 (18.9%)	60/495 (12.1%)	51/411 (12.4%)	51/397 (12.8%)	48/492 ( 9.8%)	62/407 (15.2%)	58/349 (16.6%)	55/483 (11.4%)	40/472 ( 8.5%)	55/357 (15.4%)	92/228 (40.4%)	57/302 (18.9%)	53/362 (14.6%)	27/419 ( 6.4%)	108/233 (46.4%)	40/422 ( 9.5%)	26/419 ( 6.2%)	59/356 (16.6%)	51/325 (15.7%)	63/351 (17.9%)	55/556 ( 9.9%)	59/351 (16.8%)	62/316 (19.6%)	63/358 (17.6%)	55/347 (15.9%)	60/284 (21.1%)	60/658 ( 9.1%)	57/319 (17.9%)
EH60(21)	15/546 ( 2.7%)	52/431 (12.1%)	58/430 (13.5%)	52/424 (12.3%)	73/396 (18.4%)	59/389 (15.2%)	52/410 (12.7%)	62/467 (13.3%)	55/402 (13.7%)	58/378 (15.3%)	65/413 (15.7%)	2/574 ( 0.3%)	56/377 (14.9%)	62/430 (14.4%)	51/442 (11.5%)	64/356 (18.0%)	61/381 (16.0%)	100/292 (34.2%)	59/439 (13.4%)	97/301 (32.2%)	73/528 (13.8%)	64/389 (16.5%)	60/523 (11.5%)	52/389 (13.4%)	44/454 ( 9.7%)	53/495 (10.7%)	4/632 ( 0.6%)	67/327 (20.5%)	19/607 ( 3.1%)	78/417 (18.7%)	52/389 (13.4%)	42/340 (12.4%)	58/312 (18.6%)	64/357 (17.9%)	103/291 (35.4%)	47/343 (13.7%)	55/390 (14.1%)	102/291 (35.1%)	32/507 ( 6.3%)	76/304 (25.0%)	55/367 (15.0%)	56/570 ( 9.8%)	60/382 (15.7%)	64/342 (18.7%)	67/351 (19.1%)	60/366 (16.4%)	38/386 ( 9.8%)	64/705 ( 9.1%)	57/300 (19.0%)
EH61(20)	35/443 ( 7.9%)	54/373 (14.5%)	64/372 (17.2%)	27/459 ( 5.9%)	55/378 (14.6%)	60/356 (16.9%)	28/442 ( 6.3%)	30/533 ( 5.6%)	52/384 (13.5%)	57/366 (15.6%)	41/429 ( 9.6%)	28/433 ( 6.5%)	58/359 (16.2%)	51/384 (13.3%)	47/410 (11.5%)	45/351 (12.8%)	58/356 (16.3%)	54/322 (16.8%)	54/380 (14.2%)	61/339 (18.0%)	53/546 ( 9.7%)	49/363 (13.5%)	63/497 (12.7%)	51/361 (14.1%)	52/410 (12.7%)	40/466 ( 8.6%)	50/427 (11.7%)	44/351 (12.5%)	32/491 ( 6.5%)	54/430 (12.6%)	51/361 (14.1%)	83/232 (35.8%)	46/306 (15.0%)	56/368 (15.2%)	52/330 (15.8%)	98/223 (43.9%)	49/380 (12.9%)	52/330 (15.8%)	19/470 ( 4.0%)	53/314 (16.9%)	57/374 (15.2%)	46/572 ( 8.0%)	53/335 (15.8%)	56/323 (17.3%)	55/328 (16.8%)	48/309 (15.5%)	49/275 (17.8%)	41/728 ( 5.6%)	50/313 (16.0%)
EH62(20)	57/377 (15.1%)	62/446 (13.9%)	63/419 (15.0%)	61/392 (15.6%)	51/444 (11.5%)	60/386 (15.5%)	30/507 ( 5.9%)	37/537 ( 6.9%)	61/417 (14.6%)	62/398 (15.6%)	42/480 ( 8.8%)	37/445 ( 8.3%)	59/386 (15.3%)	31/503 ( 6.2%)	51/419 (12.2%)	61/363 (16.8%)	62/400 (15.5%)	92/296 (31.1%)	64/396 (16.2%)	99/300 (33.0%)	77/540 (14.3%)	39/450 ( 8.7%)	69/511 (13.5%)	61/381 (16.0%)	37/506 ( 7.3%)	12/660 ( 1.8%)	64/413 (15.5%)	63/327 (19.3%)	42/544 ( 7.7%)	72/419 (17.2%)	58/373 (15.5%)	50/348 (14.4%)	59/312 (18.9%)	79/340 (23.2%)	90/288 (31.2%)	66/326 (20.2%)	55/370 (14.9%)	90/288 (31.2%)	77/397 (19.4%)	82/299 (27.4%)	66/367 (18.0%)	56/572 ( 9.8%)	63/371 (17.0%)	58/346 (16.8%)	50/419 (11.9%)	57/379 (15.0%)	47/326 (14.4%)	55/715 ( 7.7%)	68/333 (20.4%)
EH63(20)	36/469 ( 7.7%)	22/554 ( 4.0%)	63/413 (15.3%)	66/386 (17.1%)	59/391 (15.1%)	61/415 (14.7%)	66/368 (17.9%)	44/545 ( 8.1%)	35/509 ( 6.9%)	28/496 ( 5.6%)	65/390 (16.7%)	55/398 (13.8%)	62/418 (14.8%)	52/416 (12.5%)	62/419 (14.8%)	60/374 (16.0%)	62/416 (14.9%)	221/282 (78.4%)	68/401 (17.0%)	98/301 (32.6%)	63/556 (11.3%)	54/401 (13.5%)	60/544 (11.0%)	66/412 (16.0%)	62/416 (14.9%)	65/479 (13.6%)	53/439 (12.1%)	71/328 (21.6%)	44/541 ( 8.1%)	70/429 (16.3%)	63/408 (15.4%)	45/324 (13.9%)	67/315 (21.3%)	67/354 (18.9%)	181/276 (65.6%)	42/330 (12.7%)	62/405 (15.3%)	181/276 (65.6%)	64/377 (17.0%)	95/281 (33.8%)	63/391 (16.1%)	49/582 ( 8.4%)	62/380 (16.3%)	46/407 (11.3%)	59/372 (15.9%)	59/359 (16.4%)	43/352 (12.2%)	71/663 (10.7%)	74/302 (24.5%)
EH64(20)	79/545 (14.5%)	85/542 (15.7%)	74/610 (12.1%)	70/578 (12.1%)	85/562 (15.1%)	78/551 (14.2%)	83/540 (15.4%)	82/638 (12.9%)	83/590 (14.1%)	79/592 (13.3%)	87/558 (15.6%)	71/568 (12.5%)	75/557 (13.5%)	84/581 (14.5%)	77/596 (12.9%)	71/567 (12.5%)	74/559 (13.2%)	75/553 (13.6%)	85/560 (15.2%)	62/574 (10.8%)	198/533 (37.1%)	75/566 (13.3%)	102/648 (15.7%)	82/541 (15.2%)	80/559 (14.3%)	85/625 (13.6%)	88/577 (15.3%)	78/550 (14.2%)	82/613 (13.4%)	93/611 (15.2%)	82/541 (15.2%)	51/533 ( 9.6%)	57/564 (10.1%)	74/595 (12.4%)	33/692 ( 4.8%)	58/544 (10.7%)	82/584 (14.0%)	33/692 ( 4.8%)	79/568 (13.9%)	62/607 (10.2%)	73/563 (13.0%)	95/701 (13.6%)	68/577 (11.8%)	68/546 (12.5%)	88/546 (16.1%)	42/629 ( 6.7%)	33/640 ( 5.2%)	48/981 ( 4.9%)	59/563 (10.5%)
EH65(20)	28/498 ( 5.6%)	72/401 (18.0%)	9/625 ( 1.4%)	51/438 (11.6%)	33/528 ( 6.2%)	18/566 ( 3.2%)	65/403 (16.1%)	43/575 ( 7.5%)	47/481 ( 9.8%)	60/425 (14.1%)	60/400 (15.0%)	67/366 (18.3%)	20/556 ( 3.6%)	76/392 (19.4%)	57/445 (12.8%)	71/364 (19.5%)	16/566 ( 2.8%)	73/351 (20.8%)	44/531 ( 8.3%)	75/328 (22.9%)	69/562 (12.3%)	61/372 (16.4%)	62/549 (11.3%)	59/386 (15.3%)	74/397 (18.6%)	38/546 ( 7.0%)	67/425 (15.8%)	81/342 (23.7%)	44/567 ( 7.8%)	74/425 (17.4%)	59/386 (15.3%)	54/343 (15.7%)	63/360 (17.5%)	73/388 (18.8%)	68/335 (20.3%)	42/361 (11.6%)	27/531 ( 5.1%)	67/335 (20.0%)	68/403 (16.9%)	75/332 (22.6%)	25/552 ( 4.5%)	80/527 (15.2%)	73/365 (20.0%)	62/388 (16.0%)	62/397 (15.6%)	54/364 (14.8%)	44/382 (11.5%)	17/900 ( 1.9%)	72/349 (20.6%)
EH66(19)	63/403 (15.6%)	66/399 (16.5%)	61/417 (14.6%)	53/429 (12.4%)	16/560 ( 2.9%)	46/446 (10.3%)	63/413 (15.3%)	62/506 (12.3%)	62/412 (15.0%)	31/495 ( 6.3%)	64/452 (14.2%)	59/366 (16.1%)	45/446 (10.1%)	65/420 (15.5%)	48/509 ( 9.4%)	60/369 (16.3%)	47/449 (10.5%)	68/351 (19.4%)	64/409 (15.6%)	67/323 (20.7%)	66/549 (12.0%)	17/554 ( 3.1%)	69/488 (14.1%)	9/582 ( 1.5%)	61/417 (14.6%)	48/519 ( 9.2%)	43/505 ( 8.5%)	59/344 (17.2%)	67/491 (13.6%)	71/447 (15.9%)	9/582 ( 1.5%)	53/311 (17.0%)	22/459 ( 4.8%)	66/356 (18.5%)	76/324 (23.5%)	58/358 (16.2%)	60/429 (14.0%)	76/324 (23.5%)	65/404 (16.1%)	65/309 (21.0%)	14/550 ( 2.5%)	73/527 (13.9%)	33/491 ( 6.7%)	56/362 (15.5%)	57/404 (14.1%)	55/354 (15.5%)	59/327 (18.0%)	62/698 ( 8.9%)	52/299 (17.4%)
EH67(18)	100/321 (31.2%)	101/344 (29.4%)	80/387 (20.7%)	53/456 (11.6%)	100/357 (28.0%)	89/346 (25.7%)	89/328 (27.1%)	46/529 ( 8.7%)	101/361 (28.0%)	106/335 (31.6%)	93/353 (26.3%)	105/321 (32.7%)	89/347 (25.6%)	121/349 (34.7%)	91/375 (24.3%)	113/302 (37.4%)	91/347 (26.2%)	66/355 (18.6%)	82/368 (22.3%)	64/383 (16.7%)	78/543 (14.4%)	85/347 (24.5%)	75/532 (14.1%)	93/366 (25.4%)	91/370 (24.6%)	67/460 (14.6%)	111/371 (29.9%)	63/330 (19.1%)	55/512 (10.7%)	43/542 ( 7.9%)	95/370 (25.7%)	60/339 (17.7%)	66/336 (19.6%)	67/416 (16.1%)	67/343 (19.5%)	61/337 (18.1%)	93/338 (27.5%)	67/343 (19.5%)	97/337 (28.8%)	59/358 (16.5%)	110/330 (33.3%)	55/599 ( 9.2%)	76/342 (22.2%)	95/305 (31.1%)	136/297 (45.8%)	63/339 (18.6%)	60/351 (17.1%)	70/683 (10.2%)	66/349 (18.9%)
EH68(18)	63/357 (17.6%)	62/390 (15.9%)	50/430 (11.6%)	48/388 (12.4%)	62/381 (16.3%)	52/401 (13.0%)	67/346 (19.4%)	58/515 (11.3%)	67/392 (17.1%)	54/415 (13.0%)	67/400 (16.8%)	56/381 (14.7%)	20/521 ( 3.8%)	65/363 (17.9%)	68/385 (17.7%)	46/384 (12.0%)	19/510 ( 3.7%)	75/325 (23.1%)	61/418 (14.6%)	49/360 (13.6%)	66/515 (12.8%)	53/383 (13.8%)	55/535 (10.3%)	66/352 (18.8%)	25/519 ( 4.8%)	15/614 ( 2.4%)	63/409 (15.4%)	66/318 (20.8%)	45/522 ( 8.6%)	76/420 (18.1%)	66/352 (18.8%)	56/290 (19.3%)	65/287 (22.6%)	75/350 (21.4%)	75/326 (23.0%)	51/321 (15.9%)	63/353 (17.8%)	75/326 (23.0%)	47/453 (10.4%)	65/346 (18.8%)	68/377 (18.0%)	63/546 (11.5%)	64/406 (15.8%)	46/406 (11.3%)	65/333 (19.5%)	51/354 (14.4%)	55/305 (18.0%)	41/759 ( 5.4%)	50/367 (13.6%)
EH69(18)	45/523 ( 8.6%)	55/549 (10.0%)	45/603 ( 7.5%)	59/543 (10.9%)	56/560 (10.0%)	42/578 ( 7.3%)	12/647 ( 1.9%)	180/417 (43.2%)	90/458 (19.7%)	66/510 (12.9%)	69/496 (13.9%)	58/503 (11.5%)	42/578 ( 7.3%)	54/522 (10.3%)	21/714 ( 2.9%)	27/601 ( 4.5%)	42/578 ( 7.3%)	72/445 (16.2%)	56/533 (10.5%)	41/535 ( 7.7%)	75/644 (11.6%)	40/608 ( 6.6%)	75/614 (12.2%)	36/535 ( 6.7%)	63/509 (12.4%)	97/494 (19.6%)	49/610 ( 8.0%)	47/561 ( 8.4%)	159/415 (38.3%)	87/522 (16.7%)	36/539 ( 6.7%)	52/446 (11.7%)	48/488 ( 9.8%)	30/616 ( 4.9%)	56/484 (11.6%)	6/606 ( 1.0%)	64/521 (12.3%)	55/484 (11.4%)	79/500 (15.8%)	38/539 ( 7.1%)	26/645 ( 4.0%)	62/685 ( 9.1%)	67/479 (14.0%)	47/505 ( 9.3%)	44/527 ( 8.3%)	61/489 (12.5%)	52/448 (11.6%)	59/833 ( 7.1%)	32/536 ( 6.0%)
EH70(18)	73/408 (17.9%)	76/397 (19.1%)	73/440 (16.6%)	20/576 ( 3.5%)	75/402 (18.7%)	52/472 (11.0%)	63/449 (14.0%)	44/601 ( 7.3%)	79/421 (18.8%)	28/570 ( 4.9%)	70/444 (15.8%)	67/416 (16.1%)	52/472 (11.0%)	81/402 (20.1%)	71/418 (17.0%)	67/377 (17.8%)	24/563 ( 4.3%)	68/383 (17.8%)	76/412 (18.4%)	60/392 (15.3%)	77/575 (13.4%)	71/407 (17.4%)	84/536 (15.7%)	26/556 ( 4.7%)	73/460 (15.9%)	28/637 ( 4.4%)	66/467 (14.1%)	55/414 (13.3%)	60/520 (11.5%)	69/452 (15.3%)	66/408 (16.2%)	63/344 (18.3%)	62/405 (15.3%)	63/428 (14.7%)	60/381 (15.7%)	49/373 (13.1%)	72/399 (18.0%)	59/381 (15.5%)	81/394 (20.6%)	55/388 (14.2%)	70/436 (16.1%)	79/553 (14.3%)	71/404 (17.6%)	53/445 (11.9%)	81/405 (20.0%)	54/374 (14.4%)	56/378 (14.8%)	74/720 (10.3%)	61/422 (14.5%)
EH71(18)	63/360 (17.5%)	73/368 (19.8%)	63/384 (16.4%)	10/548 ( 1.8%)	64/385 (16.6%)	70/363 (19.3%)	77/344 (22.4%)	49/515 ( 9.5%)	61/403 (15.1%)	66/339 (19.5%)	71/371 (19.1%)	65/360 (18.1%)	69/363 (19.0%)	84/365 (23.0%)	61/399 (15.3%)	67/341 (19.6%)	70/365 (19.2%)	64/353 (18.1%)	60/414 (14.5%)	56/346 (16.2%)	65/538 (12.1%)	65/347 (18.7%)	63/557 (11.3%)	67/352 (19.0%)	73/395 (18.5%)	62/485 (12.8%)	68/404 (16.8%)	23/488 ( 4.7%)	52/501 (10.4%)	65/441 (14.7%)	67/352 (19.0%)	62/295 (21.0%)	55/339 (16.2%)	48/427 (11.2%)	61/341 (17.9%)	49/298 (16.4%)	61/340 (17.9%)	61/341 (17.9%)	83/353 (23.5%)	56/343 (16.3%)	78/371 (21.0%)	62/534 (11.6%)	63/360 (17.5%)	68/311 (21.9%)	75/329 (22.8%)	66/315 (21.0%)	55/312 (17.6%)	58/708 ( 8.2%)	54/334 (16.2%)
EH72(18)	39/503 ( 7.8%)	75/414 (18.1%)	60/447 (13.4%)	37/533 ( 6.9%)	72/419 (17.2%)	68/391 (17.4%)	71/391 (18.2%)	46/549 ( 8.4%)	71/414 (17.1%)	62/397 (15.6%)	34/555 ( 6.1%)	65/403 (16.1%)	68/384 (17.7%)	71/444 (16.0%)	66/477 (13.8%)	53/421 (12.6%)	66/395 (16.7%)	55/366 (15.0%)	29/566 ( 5.1%)	70/371 (18.9%)	82/548 (15.0%)	67/396 (16.9%)	51/577 ( 8.8%)	67/410 (16.3%)	64/434 (14.7%)	29/619 ( 4.7%)	73/461 (15.8%)	71/349 (20.3%)	48/565 ( 8.5%)	57/537 (10.6%)	67/410 (16.3%)	56/353 (15.9%)	64/340 (18.8%)	62/410 (15.1%)	56/404 (13.9%)	42/362 (11.6%)	66/413 (16.0%)	55/404 (13.6%)	71/403 (17.6%)	60/365 (16.4%)	70/402 (17.4%)	64/587 (10.9%)	62/403 (15.4%)	16/547 ( 2.9%)	53/443 (12.0%)	59/378 (15.6%)	59/339 (17.4%)	7/936 ( 0.7%)	56/361 (15.5%)
EH73(17)	31/455 ( 6.8%)	60/416 (14.4%)	66/379 (17.4%)	63/358 (17.6%)	42/467 ( 9.0%)	46/439 (10.5%)	14/515 ( 2.7%)	52/498 (10.4%)	67/396 (16.9%)	51/368 (13.9%)	61/387 (15.8%)	50/376 (13.3%)	67/371 (18.1%)	59/405 (14.6%)	40/475 ( 8.4%)	45/385 (11.7%)	47/419 (11.2%)	29/443 ( 6.5%)	67/417 (16.1%)	15/477 ( 3.1%)	51/588 ( 8.7%)	46/420 (11.0%)	43/576 ( 7.5%)	55/384 (14.3%)	58/428 (13.6%)	54/454 (11.9%)	58/436 (13.3%)	65/341 (19.1%)	44/489 ( 9.0%)	67/432 (15.5%)	62/358 (17.3%)	38/347 (11.0%)	28/408 ( 6.9%)	57/370 (15.4%)	43/362 (11.9%)	25/404 ( 6.2%)	51/395 (12.9%)	44/362 (12.2%)	30/483 ( 6.2%)	46/347 (13.3%)	38/473 ( 8.0%)	60/588 (10.2%)	52/395 (13.2%)	45/380 (11.8%)	47/379 (12.4%)	32/383 ( 8.4%)	55/312 (17.6%)	14/846 ( 1.7%)	47/384 (12.2%)
EH74(17)	32/476 ( 6.7%)	23/535 ( 4.3%)	58/401 (14.5%)	15/515 ( 2.9%)	55/391 (14.1%)	12/523 ( 2.3%)	11/523 ( 2.1%)	69/469 (14.7%)	54/411 (13.1%)	31/474 ( 6.5%)	52/403 (12.9%)	25/472 ( 5.3%)	22/499 ( 4.4%)	52/384 (13.5%)	60/433 (13.9%)	57/361 (15.8%)	16/514 ( 3.1%)	71/288 (24.7%)	63/388 (16.2%)	64/303 (21.1%)	63/540 (11.7%)	57/385 (14.8%)	52/519 (10.0%)	59/386 (15.3%)	53/413 (12.8%)	37/547 ( 6.8%)	50/469 (10.7%)	73/325 (22.5%)	41/539 ( 7.6%)	67/419 (16.0%)	59/386 (15.3%)	47/293 (16.0%)	65/308 (21.1%)	71/330 (21.5%)	73/292 (25.0%)	47/300 (15.7%)	55/366 (15.0%)	73/292 (25.0%)	58/378 (15.3%)	70/288 (24.3%)	20/508 ( 3.9%)	57/552 (10.3%)	59/345 (17.1%)	61/331 (18.4%)	53/334 (15.9%)	51/351 (14.5%)	53/300 (17.7%)	57/661 ( 8.6%)	60/285 (21.1%)
EH75(16)	82/1029 ( 8.0%)	74/1110 ( 6.7%)	93/1054 ( 8.8%)	71/1047 ( 6.8%)	85/1037 ( 8.2%)	75/1053 ( 7.1%)	65/1052 ( 6.2%)	93/1112 ( 8.4%)	88/1052 ( 8.4%)	78/1071 ( 7.3%)	82/1088 ( 7.5%)	84/1058 ( 7.9%)	76/1057 ( 7.2%)	77/1065 ( 7.2%)	83/1092 ( 7.6%)	79/1061 ( 7.4%)	87/1064 ( 8.2%)	67/1065 ( 6.3%)	91/1043 ( 8.7%)	69/1033 ( 6.7%)	132/1088 (12.1%)	78/1056 ( 7.4%)	114/1101 (10.4%)	72/1047 ( 6.9%)	81/1073 ( 7.5%)	94/1145 ( 8.2%)	85/1095 ( 7.8%)	62/1058 ( 5.9%)	84/1119 ( 7.5%)	88/1079 ( 8.2%)	72/1047 ( 6.9%)	55/1050 ( 5.2%)	61/1055 ( 5.8%)	70/1076 ( 6.5%)	65/1032 ( 6.3%)	61/1047 ( 5.8%)	99/1052 ( 9.4%)	65/1032 ( 6.3%)	84/1090 ( 7.7%)	62/1075 ( 5.8%)	84/1038 ( 8.1%)	114/1092 (10.4%)	62/1122 ( 5.5%)	62/1088 ( 5.7%)	75/1041 ( 7.2%)	11/1238 ( 0.9%)	43/1096 ( 3.9%)	51/1470 ( 3.5%)	55/1074 ( 5.1%)
EH76(16)	56/401 (14.0%)	60/425 (14.1%)	69/425 (16.2%)	58/406 (14.3%)	62/442 (14.0%)	71/364 (19.5%)	58/388 (14.9%)	65/473 (13.7%)	65/395 (16.5%)	67/388 (17.3%)	66/411 (16.1%)	53/417 (12.7%)	69/376 (18.4%)	68/378 (18.0%)	57/430 (13.3%)	66/364 (18.1%)	64/372 (17.2%)	55/366 (15.0%)	70/404 (17.3%)	57/356 (16.0%)	70/525 (13.3%)	59/401 (14.7%)	17/690 ( 2.5%)	60/397 (15.1%)	73/387 (18.9%)	35/588 ( 6.0%)	58/391 (14.8%)	61/384 (15.9%)	61/443 (13.8%)	65/437 (14.9%)	61/397 (15.4%)	51/320 (15.9%)	56/329 (17.0%)	48/411 (11.7%)	59/347 (17.0%)	49/325 (15.1%)	20/521 ( 3.8%)	59/347 (17.0%)	56/386 (14.5%)	56/355 (15.8%)	59/405 (14.6%)	80/515 (15.5%)	60/370 (16.2%)	62/352 (17.6%)	66/348 (19.0%)	54/364 (14.8%)	63/312 (20.2%)	68/695 ( 9.8%)	43/399 (10.8%)
EH77(16)	79/363 (21.8%)	76/404 (18.8%)	83/382 (21.7%)	60/422 (14.2%)	74/399 (18.5%)	88/341 (25.8%)	82/366 (22.4%)	28/608 ( 4.6%)	82/412 (19.9%)	78/372 (21.0%)	93/375 (24.8%)	73/369 (19.8%)	85/361 (23.5%)	87/389 (22.4%)	77/441 (17.5%)	79/335 (23.6%)	82/340 (24.1%)	69/379 (18.2%)	79/377 (21.0%)	49/401 (12.2%)	78/542 (14.4%)	74/356 (20.8%)	76/508 (15.0%)	82/378 (21.7%)	73/399 (18.3%)	46/582 ( 7.9%)	68/404 (16.8%)	75/358 (20.9%)	66/487 (13.6%)	67/464 (14.4%)	83/378 (22.0%)	61/350 (17.4%)	59/338 (17.5%)	79/375 (21.1%)	53/399 (13.3%)	53/366 (14.5%)	76/372 (20.4%)	52/398 (13.1%)	80/366 (21.9%)	68/360 (18.9%)	72/399 (18.0%)	58/589 ( 9.8%)	88/364 (24.2%)	77/333 (23.1%)	86/347 (24.8%)	62/384 (16.1%)	51/344 (14.8%)	69/722 ( 9.6%)	63/340 (18.5%)
EH78(15)	61/476 (12.8%)	47/593 ( 7.9%)	35/581 ( 6.0%)	65/485 (13.4%)	39/590 ( 6.6%)	68/463 (14.7%)	57/509 (11.2%)	118/454 (26.0%)	55/551 (10.0%)	37/577 ( 6.4%)	37/612 ( 6.0%)	55/523 (10.5%)	60/493 (12.2%)	53/559 ( 9.5%)	67/546 (12.3%)	30/582 ( 5.2%)	61/478 (12.8%)	47/512 ( 9.2%)	45/603 ( 7.5%)	26/596 ( 4.4%)	90/611 (14.7%)	25/621 ( 4.0%)	53/672 ( 7.9%)	41/574 ( 7.1%)	21/676 ( 3.1%)	134/425 (31.5%)	19/680 ( 2.8%)	64/483 (13.3%)	105/462 (22.7%)	83/524 (15.8%)	41/574 ( 7.1%)	51/451 (11.3%)	45/473 ( 9.5%)	70/497 (14.1%)	9/642 ( 1.4%)	47/452 (10.4%)	21/631 ( 3.3%)	9/642 ( 1.4%)	83/436 (19.0%)	24/587 ( 4.1%)	35/599 ( 5.8%)	59/689 ( 8.6%)	15/642 ( 2.3%)	24/590 ( 4.1%)	69/452 (15.3%)	12/619 ( 1.9%)	50/464 (10.8%)	50/864 ( 5.8%)	19/607 ( 3.1%)
EH79(14)	84/405 (20.7%)	87/392 (22.2%)	81/420 (19.3%)	68/475 (14.3%)	91/398 (22.9%)	85/389 (21.9%)	85/382 (22.3%)	94/477 (19.7%)	97/391 (24.8%)	90/377 (23.9%)	86/393 (21.9%)	86/376 (22.9%)	86/396 (21.7%)	91/410 (22.2%)	75/407 (18.4%)	100/397 (25.2%)	87/397 (21.9%)	70/464 (15.1%)	78/419 (18.6%)	62/446 (13.9%)	74/598 (12.4%)	89/390 (22.8%)	84/545 (15.4%)	91/380 (23.9%)	89/387 (23.0%)	62/558 (11.1%)	165/375 (44.0%)	56/438 (12.8%)	72/483 (14.9%)	19/666 ( 2.9%)	91/380 (23.9%)	62/384 (16.1%)	64/405 (15.8%)	72/459 (15.7%)	52/442 (11.8%)	66/394 (16.8%)	88/386 (22.8%)	51/442 (11.5%)	85/387 (22.0%)	59/442 (13.3%)	108/379 (28.5%)	48/744 ( 6.5%)	75/425 (17.6%)	113/369 (30.6%)	113/382 (29.6%)	64/410 (15.6%)	58/383 (15.1%)	65/749 ( 8.7%)	52/467 (11.1%)
EH80(14)	79/427 (18.5%)	77/424 (18.2%)	32/564 ( 5.7%)	78/398 (19.6%)	85/421 (20.2%)	44/510 ( 8.6%)	69/415 (16.6%)	69/494 (14.0%)	86/460 (18.7%)	68/411 (16.5%)	83/438 (18.9%)	62/414 (15.0%)	44/507 ( 8.7%)	82/409 (20.0%)	80/420 (19.0%)	59/449 (13.1%)	43/512 ( 8.4%)	46/436 (10.6%)	58/444 (13.1%)	42/441 ( 9.5%)	81/546 (14.8%)	61/424 (14.4%)	88/499 (17.6%)	70/407 (17.2%)	82/419 (19.6%)	71/518 (13.7%)	74/468 (15.8%)	47/445 (10.6%)	45/577 ( 7.8%)	70/496 (14.1%)	68/407 (16.7%)	57/358 (15.9%)	34/440 ( 7.7%)	73/391 (18.7%)	47/438 (10.7%)	54/352 (15.3%)	72/399 (18.0%)	47/438 (10.7%)	80/395 (20.3%)	49/418 (11.7%)	76/426 (17.8%)	24/733 ( 3.3%)	77/381 (20.2%)	72/393 (18.3%)	69/416 (16.6%)	64/364 (17.6%)	37/414 ( 8.9%)	30/870 ( 3.4%)	39/472 ( 8.3%)
EH81(14)	33/507 ( 6.5%)	68/396 (17.2%)	58/443 (13.1%)	53/450 (11.8%)	68/398 (17.1%)	67/386 (17.4%)	47/451 (10.4%)	51/531 ( 9.6%)	60/421 (14.3%)	71/411 (17.3%)	65/395 (16.5%)	62/411 (15.1%)	65/386 (16.8%)	83/392 (21.2%)	63/460 (13.7%)	68/350 (19.4%)	66/401 (16.5%)	79/343 (23.0%)	64/406 (15.8%)	72/347 (20.7%)	65/592 (11.0%)	65/376 (17.3%)	49/616 ( 8.0%)	64/407 (15.7%)	63/449 (14.0%)	55/539 (10.2%)	62/438 (14.2%)	86/348 (24.7%)	41/574 ( 7.1%)	81/413 (19.6%)	64/407 (15.7%)	57/353 (16.1%)	64/347 (18.4%)	63/370 (17.0%)	73/340 (21.5%)	51/357 (14.3%)	65/394 (16.5%)	72/340 (21.2%)	63/399 (15.8%)	71/329 (21.6%)	67/415 (16.1%)	71/602 (11.8%)	85/359 (23.7%)	10/548 ( 1.8%)	63/396 (15.9%)	51/375 (13.6%)	52/369 (14.1%)	67/723 ( 9.3%)	72/352 (20.5%)
EH82(14)	89/672 (13.2%)	95/649 (14.6%)	73/731 (10.0%)	29/824 ( 3.5%)	91/646 (14.1%)	82/646 (12.7%)	75/643 (11.7%)	66/790 ( 8.4%)	65/719 ( 9.0%)	85/637 (13.3%)	74/676 (10.9%)	73/692 (10.5%)	85/667 (12.7%)	93/653 (14.2%)	66/718 ( 9.2%)	73/654 (11.2%)	76/657 (11.6%)	70/630 (11.1%)	88/679 (13.0%)	57/680 ( 8.4%)	103/719 (14.3%)	67/695 ( 9.6%)	100/725 (13.8%)	82/647 (12.7%)	73/711 (10.3%)	96/708 (13.6%)	77/674 (11.4%)	61/708 ( 8.6%)	66/758 ( 8.7%)	71/717 ( 9.9%)	84/665 (12.6%)	51/644 ( 7.9%)	56/653 ( 8.6%)	48/735 ( 6.5%)	59/671 ( 8.8%)	49/649 ( 7.6%)	66/673 ( 9.8%)	59/671 ( 8.8%)	56/710 ( 7.9%)	56/679 ( 8.2%)	63/662 ( 9.5%)	93/785 (11.8%)	60/694 ( 8.6%)	62/676 ( 9.2%)	72/621 (11.6%)	54/688 ( 7.8%)	63/636 ( 9.9%)	94/846 (11.1%)	43/723 ( 5.9%)
EH83(14)	29/533 ( 5.4%)	53/472 (11.2%)	69/444 (15.5%)	68/424 (16.0%)	78/401 (19.5%)	70/389 (18.0%)	46/488 ( 9.4%)	69/482 (14.3%)	50/511 ( 9.8%)	45/481 ( 9.4%)	68/426 (16.0%)	40/512 ( 7.8%)	66/404 (16.3%)	50/493 (10.1%)	31/576 ( 5.4%)	45/433 (10.4%)	77/376 (20.5%)	71/325 (21.8%)	48/515 ( 9.3%)	66/331 (19.9%)	13/759 ( 1.7%)	35/503 ( 7.0%)	40/631 ( 6.3%)	12/579 ( 2.1%)	43/514 ( 8.4%)	57/539 (10.6%)	66/428 (15.4%)	69/343 (20.1%)	78/466 (16.7%)	65/484 (13.4%)	42/489 ( 8.6%)	52/338 (15.4%)	65/322 (20.2%)	73/366 (19.9%)	76/340 (22.4%)	56/350 (16.0%)	51/431 (11.8%)	75/340 (22.1%)	60/403 (14.9%)	68/323 (21.1%)	74/402 (18.4%)	65/593 (11.0%)	62/410 (15.1%)	37/473 ( 7.8%)	48/441 (10.9%)	53/404 (13.1%)	45/356 (12.6%)	80/693 (11.5%)	79/345 (22.9%)
EH84(13)	78/557 (14.0%)	81/543 (14.9%)	90/545 (16.5%)	41/678 ( 6.0%)	79/547 (14.4%)	75/518 (14.5%)	82/534 (15.4%)	71/625 (11.4%)	66/601 (11.0%)	83/502 (16.5%)	83/563 (14.7%)	76/552 (13.8%)	77/521 (14.8%)	93/543 (17.1%)	80/551 (14.5%)	76/572 (13.3%)	70/539 (13.0%)	72/579 (12.4%)	89/540 (16.5%)	68/553 (12.3%)	185/522 (35.4%)	83/529 (15.7%)	96/619 (15.5%)	86/528 (16.3%)	81/550 (14.7%)	54/726 ( 7.4%)	87/562 (15.5%)	77/526 (14.6%)	74/680 (10.9%)	95/580 (16.4%)	86/528 (16.3%)	52/527 ( 9.9%)	56/534 (10.5%)	71/590 (12.0%)	76/515 (14.8%)	50/546 ( 9.2%)	89/540 (16.5%)	76/515 (14.8%)	81/574 (14.1%)	41/618 ( 6.6%)	80/564 (14.2%)	64/770 ( 8.3%)	77/539 (14.3%)	75/536 (14.0%)	74/528 (14.0%)	53/547 ( 9.7%)	29/633 ( 4.6%)	104/746 (13.9%)	56/528 (10.6%)
EH85(13)	41/383 (10.7%)	44/409 (10.8%)	52/388 (13.4%)	28/428 ( 6.5%)	43/418 (10.3%)	61/323 (18.9%)	45/386 (11.7%)	58/448 (12.9%)	49/372 (13.2%)	63/338 (18.6%)	60/357 (16.8%)	49/357 (13.7%)	60/323 (18.6%)	50/383 (13.1%)	57/384 (14.8%)	48/319 (15.0%)	34/414 ( 8.2%)	52/320 (16.2%)	56/372 (15.1%)	56/336 (16.7%)	50/517 ( 9.7%)	57/346 (16.5%)	72/478 (15.1%)	54/337 (16.0%)	39/448 ( 8.7%)	27/516 ( 5.2%)	51/397 (12.8%)	51/340 (15.0%)	7/605 ( 1.2%)	47/463 (10.2%)	55/337 (16.3%)	79/227 (34.8%)	53/283 (18.7%)	45/359 (12.5%)	24/427 ( 5.6%)	100/223 (44.8%)	51/353 (14.4%)	24/427 ( 5.6%)	45/362 (12.4%)	52/328 (15.9%)	53/378 (14.0%)	50/532 ( 9.4%)	50/338 (14.8%)	54/332 (16.3%)	54/321 (16.8%)	25/397 ( 6.3%)	51/272 (18.8%)	37/716 ( 5.2%)	36/337 (10.7%)
EH86(13)	112/342 (32.7%)	124/362 (34.3%)	83/394 (21.1%)	58/421 (13.8%)	113/357 (31.7%)	133/343 (38.8%)	132/343 (38.5%)	45/572 ( 7.9%)	104/357 (29.1%)	134/339 (39.5%)	126/356 (35.4%)	125/339 (36.9%)	130/343 (37.9%)	121/369 (32.8%)	115/371 (31.0%)	91/353 (25.8%)	130/343 (37.9%)	55/411 (13.4%)	84/399 (21.1%)	60/399 (15.0%)	76/575 (13.2%)	100/348 (28.7%)	73/495 (14.7%)	124/349 (35.5%)	74/371 (19.9%)	70/496 (14.1%)	78/384 (20.3%)	41/441 ( 9.3%)	67/501 (13.4%)	62/453 (13.7%)	123/347 (35.4%)	55/361 (15.2%)	57/361 (15.8%)	43/481 ( 8.9%)	51/392 (13.0%)	49/373 (13.1%)	126/343 (36.7%)	51/392 (13.0%)	88/377 (23.3%)	62/379 (16.4%)	76/385 (19.7%)	78/547 (14.3%)	72/384 (18.8%)	72/361 (19.9%)	90/349 (25.8%)	37/445 ( 8.3%)	53/363 (14.6%)	67/708 ( 9.5%)	29/456 ( 6.4%)
EH87(13)	89/344 (25.9%)	84/365 (23.0%)	75/414 (18.1%)	43/520 ( 8.3%)	89/364 (24.5%)	82/326 (25.2%)	79/356 (22.2%)	54/548 ( 9.9%)	88/374 (23.5%)	84/335 (25.1%)	96/357 (26.9%)	89/347 (25.6%)	77/346 (22.3%)	94/354 (26.6%)	86/383 (22.5%)	110/305 (36.1%)	82/341 (24.0%)	58/384 (15.1%)	87/401 (21.7%)	67/380 (17.6%)	68/572 (11.9%)	83/355 (23.4%)	75/504 (14.9%)	83/356 (23.3%)	86/368 (23.4%)	80/459 (17.4%)	88/382 (23.0%)	49/440 (11.1%)	50/540 ( 9.3%)	68/455 (14.9%)	83/356 (23.3%)	41/385 (10.6%)	52/358 (14.5%)	70/367 (19.1%)	56/383 (14.6%)	65/342 (19.0%)	90/344 (26.2%)	57/383 (14.9%)	92/350 (26.3%)	71/366 (19.4%)	100/324 (30.9%)	69/553 (12.5%)	72/338 (21.3%)	101/305 (33.1%)	106/303 (35.0%)	60/365 (16.4%)	48/365 (13.2%)	68/707 ( 9.6%)	47/335 (14.0%)
EH88(13)	74/408 (18.1%)	78/408 (19.1%)	57/438 (13.0%)	17/579 ( 2.9%)	73/415 (17.6%)	59/429 (13.8%)	58/447 (13.0%)	15/684 ( 2.2%)	60/445 (13.5%)	73/396 (18.4%)	58/467 (12.4%)	64/442 (14.5%)	57/433 (13.2%)	75/406 (18.5%)	61/464 (13.1%)	62/386 (16.1%)	57/438 (13.0%)	47/420 (11.2%)	23/572 ( 4.0%)	49/426 (11.5%)	77/577 (13.3%)	67/414 (16.2%)	68/567 (12.0%)	48/492 ( 9.8%)	83/387 (21.4%)	50/538 ( 9.3%)	45/517 ( 8.7%)	61/395 (15.4%)	70/516 (13.6%)	87/443 (19.6%)	48/492 ( 9.8%)	32/407 ( 7.9%)	38/432 ( 8.8%)	80/396 (20.2%)	48/421 (11.4%)	52/356 (14.6%)	58/436 (13.3%)	48/421 (11.4%)	38/496 ( 7.7%)	40/411 ( 9.7%)	67/419 (16.0%)	69/565 (12.2%)	43/481 ( 8.9%)	47/440 (10.7%)	54/426 (12.7%)	48/397 (12.1%)	53/387 (13.7%)	55/756 ( 7.3%)	50/375 (13.3%)
EH89(13)	36/617 ( 5.8%)	82/552 (14.9%)	13/768 ( 1.7%)	71/513 (13.8%)	78/524 (14.9%)	73/535 (13.6%)	49/596 ( 8.2%)	108/547 (19.7%)	83/515 (16.1%)	69/513 (13.5%)	42/662 ( 6.3%)	64/578 (11.1%)	73/538 (13.6%)	69/546 (12.6%)	46/664 ( 6.9%)	67/539 (12.4%)	69/530 (13.0%)	57/530 (10.8%)	40/658 ( 6.1%)	21/669 ( 3.1%)	44/789 ( 5.6%)	50/614 ( 8.1%)	54/736 ( 7.3%)	29/668 ( 4.3%)	54/624 ( 8.7%)	98/562 (17.4%)	55/672 ( 8.2%)	17/673 ( 2.5%)	95/552 (17.2%)	58/662 ( 8.8%)	29/668 ( 4.3%)	44/554 ( 7.9%)	53/485 (10.9%)	72/528 (13.6%)	54/570 ( 9.5%)	37/544 ( 6.8%)	46/591 ( 7.8%)	54/570 ( 9.5%)	34/667 ( 5.1%)	55/567 ( 9.7%)	23/712 ( 3.2%)	88/640 (13.8%)	63/536 (11.8%)	57/542 (10.5%)	71/485 (14.6%)	20/660 ( 3.0%)	19/611 ( 3.1%)	94/763 (12.3%)	50/552 ( 9.1%)
EH90(13)	65/342 (19.0%)	64/395 (16.2%)	59/386 (15.3%)	51/397 (12.8%)	67/382 (17.5%)	65/347 (18.7%)	76/341 (22.3%)	56/504 (11.1%)	62/400 (15.5%)	74/351 (21.1%)	61/388 (15.7%)	68/365 (18.6%)	67/347 (19.3%)	63/346 (18.2%)	67/412 (16.3%)	64/336 (19.0%)	67/336 (19.9%)	54/330 (16.4%)	63/369 (17.1%)	62/341 (18.2%)	72/511 (14.1%)	73/349 (20.9%)	56/543 (10.3%)	66/346 (19.1%)	64/411 (15.6%)	24/578 ( 4.2%)	63/383 (16.4%)	61/354 (17.2%)	78/439 (17.8%)	34/549 ( 6.2%)	66/346 (19.1%)	57/306 (18.6%)	50/307 (16.3%)	49/371 (13.2%)	60/329 (18.2%)	8/463 ( 1.7%)	69/352 (19.6%)	61/329 (18.5%)	66/353 (18.7%)	65/313 (20.8%)	63/354 (17.8%)	52/598 ( 8.7%)	65/347 (18.7%)	66/334 (19.8%)	72/325 (22.2%)	51/342 (14.9%)	52/312 (16.7%)	51/715 ( 7.1%)	43/365 (11.8%)
EH91(13)	80/348 (23.0%)	78/376 (20.7%)	75/379 (19.8%)	42/427 ( 9.8%)	94/388 (24.2%)	74/342 (21.6%)	76/336 (22.6%)	78/452 (17.3%)	81/360 (22.5%)	85/332 (25.6%)	83/371 (22.4%)	79/347 (22.8%)	71/347 (20.5%)	81/363 (22.3%)	76/394 (19.3%)	84/319 (26.3%)	71/339 (20.9%)	51/391 (13.0%)	76/364 (20.9%)	52/384 (13.5%)	77/532 (14.5%)	72/329 (21.9%)	53/588 ( 9.0%)	77/355 (21.7%)	90/365 (24.7%)	52/516 (10.1%)	80/402 (19.9%)	57/394 (14.5%)	69/462 (14.9%)	59/446 (13.2%)	76/355 (21.4%)	53/359 (14.8%)	52/352 (14.8%)	36/478 ( 7.5%)	39/440 ( 8.9%)	50/341 (14.7%)	64/355 (18.0%)	39/440 ( 8.9%)	96/343 (28.0%)	54/379 (14.2%)	76/339 (22.4%)	54/635 ( 8.5%)	71/376 (18.9%)	78/332 (23.5%)	73/354 (20.6%)	65/356 (18.3%)	39/371 (10.5%)	72/692 (10.4%)	8/536 ( 1.5%)
EH92(12)	64/386 (16.6%)	66/410 (16.1%)	62/416 (14.9%)	57/410 (13.9%)	29/523 ( 5.5%)	63/383 (16.4%)	13/550 ( 2.4%)	62/476 (13.0%)	36/512 ( 7.0%)	63/393 (16.0%)	54/435 (12.4%)	40/456 ( 8.8%)	63/384 (16.4%)	64/390 (16.4%)	9/610 ( 1.5%)	70/372 (18.8%)	27/502 ( 5.4%)	91/314 (29.0%)	59/416 (14.2%)	92/308 (29.9%)	81/557 (14.5%)	60/380 (15.8%)	49/590 ( 8.3%)	42/455 ( 9.2%)	42/487 ( 8.6%)	56/511 (11.0%)	58/456 (12.7%)	71/353 (20.1%)	73/446 (16.4%)	73/443 (16.5%)	27/507 ( 5.3%)	38/369 (10.3%)	22/445 ( 4.9%)	69/345 (20.0%)	93/301 (30.9%)	52/340 (15.3%)	33/461 ( 7.2%)	93/301 (30.9%)	66/400 (16.5%)	84/301 (27.9%)	70/382 (18.3%)	63/597 (10.6%)	20/525 ( 3.8%)	64/352 (18.2%)	50/387 (12.9%)	63/360 (17.5%)	48/334 (14.4%)	66/694 ( 9.5%)	70/310 (22.6%)
EH93(12)	83/566 (14.7%)	89/573 (15.5%)	78/565 (13.8%)	86/550 (15.6%)	96/573 (16.8%)	85/551 (15.4%)	88/557 (15.8%)	54/752 ( 7.2%)	80/610 (13.1%)	81/548 (14.8%)	92/564 (16.3%)	84/531 (15.8%)	79/534 (14.8%)	82/538 (15.2%)	91/577 (15.8%)	71/577 (12.3%)	82/554 (14.8%)	62/567 (10.9%)	62/636 ( 9.7%)	63/558 (11.3%)	174/549 (31.7%)	76/537 (14.2%)	96/614 (15.6%)	76/573 (13.3%)	76/602 (12.6%)	98/616 (15.9%)	91/588 (15.5%)	65/551 (11.8%)	92/565 (16.3%)	39/785 ( 5.0%)	81/562 (14.4%)	50/559 ( 8.9%)	54/534 (10.1%)	80/557 (14.4%)	70/528 (13.3%)	77/521 (14.8%)	81/564 (14.4%)	71/528 (13.4%)	93/572 (16.3%)	59/566 (10.4%)	93/536 (17.4%)	99/727 (13.6%)	65/538 (12.1%)	66/592 (11.1%)	74/561 (13.2%)	37/660 ( 5.6%)	63/545 (11.6%)	38/1013 ( 3.8%)	64/551 (11.6%)
EH94(12)	33/534 ( 6.2%)	66/444 (14.9%)	66/423 (15.6%)	70/414 (16.9%)	20/605 ( 3.3%)	31/532 ( 5.8%)	62/412 (15.0%)	49/583 ( 8.4%)	68/438 (15.5%)	35/531 ( 6.6%)	33/542 ( 6.1%)	70/420 (16.7%)	28/519 ( 5.4%)	75/426 (17.6%)	31/559 ( 5.5%)	41/451 ( 9.1%)	26/527 ( 4.9%)	75/370 (20.3%)	70/413 (16.9%)	66/371 (17.8%)	82/573 (14.3%)	70/432 (16.2%)	75/524 (14.3%)	73/389 (18.8%)	69/464 (14.9%)	72/494 (14.6%)	78/452 (17.3%)	70/413 (16.9%)	71/502 (14.1%)	78/467 (16.7%)	73/389 (18.8%)	45/392 (11.5%)	71/351 (20.2%)	79/399 (19.8%)	65/373 (17.4%)	59/351 (16.8%)	63/400 (15.8%)	65/373 (17.4%)	31/543 ( 5.7%)	65/368 (17.7%)	73/419 (17.4%)	56/613 ( 9.1%)	62/414 (15.0%)	60/426 (14.1%)	65/380 (17.1%)	66/368 (17.9%)	61/337 (18.1%)	62/763 ( 8.1%)	53/399 (13.3%)
EH95(11)	83/460 (18.0%)	74/507 (14.6%)	41/604 ( 6.8%)	60/535 (11.2%)	60/561 (10.7%)	31/620 ( 5.0%)	23/655 ( 3.5%)	211/418 (50.5%)	70/535 (13.1%)	61/530 (11.5%)	89/502 (17.7%)	45/550 ( 8.2%)	29/627 ( 4.6%)	50/571 ( 8.8%)	57/587 ( 9.7%)	64/505 (12.7%)	45/577 ( 7.8%)	54/476 (11.3%)	60/561 (10.7%)	54/516 (10.5%)	59/718 ( 8.2%)	40/571 ( 7.0%)	84/580 (14.5%)	71/470 (15.1%)	35/649 ( 5.4%)	104/485 (21.4%)	59/576 (10.2%)	32/611 ( 5.2%)	207/416 (49.8%)	33/709 ( 4.7%)	44/564 ( 7.8%)	28/532 ( 5.3%)	67/436 (15.4%)	23/662 ( 3.5%)	26/609 ( 4.3%)	48/453 (10.6%)	27/649 ( 4.2%)	26/609 ( 4.3%)	41/618 ( 6.6%)	68/444 (15.3%)	45/581 ( 7.7%)	80/618 (12.9%)	73/479 (15.2%)	58/473 (12.3%)	23/632 ( 3.6%)	56/487 (11.5%)	57/453 (12.6%)	52/888 ( 5.9%)	35/555 ( 6.3%)
EH96(11)	31/479 ( 6.5%)	69/433 (15.9%)	61/434 (14.1%)	54/371 (14.6%)	69/428 (16.1%)	32/477 ( 6.7%)	64/401 (16.0%)	67/490 (13.7%)	69/415 (16.6%)	34/480 ( 7.1%)	56/423 (13.2%)	26/506 ( 5.1%)	32/493 ( 6.5%)	36/485 ( 7.4%)	34/552 ( 6.2%)	63/359 (17.5%)	31/485 ( 6.4%)	64/346 (18.5%)	28/538 ( 5.2%)	68/330 (20.6%)	79/514 (15.4%)	56/389 (14.4%)	60/514 (11.7%)	57/386 (14.8%)	21/585 ( 3.6%)	61/491 (12.4%)	67/436 (15.4%)	62/340 (18.2%)	32/569 ( 5.6%)	63/439 (14.4%)	60/388 (15.5%)	51/306 (16.7%)	66/321 (20.6%)	75/374 (20.1%)	60/335 (17.9%)	55/338 (16.3%)	67/390 (17.2%)	61/335 (18.2%)	46/432 (10.6%)	59/332 (17.8%)	41/471 ( 8.7%)	63/555 (11.4%)	68/384 (17.7%)	62/318 (19.5%)	76/339 (22.4%)	39/410 ( 9.5%)	56/326 (17.2%)	56/674 ( 8.3%)	58/319 (18.2%)
EH97(11)	62/550 (11.3%)	31/660 ( 4.7%)	30/666 ( 4.5%)	76/490 (15.5%)	52/585 ( 8.9%)	58/557 (10.4%)	59/546 (10.8%)	75/568 (13.2%)	76/512 (14.8%)	73/499 (14.6%)	96/521 (18.4%)	60/549 (10.9%)	49/544 ( 9.0%)	76/498 (15.3%)	21/727 ( 2.9%)	11/671 ( 1.6%)	67/508 (13.2%)	59/516 (11.4%)	50/592 ( 8.4%)	70/464 (15.1%)	101/593 (17.0%)	8/714 ( 1.1%)	42/756 ( 5.6%)	71/491 (14.5%)	68/531 (12.8%)	69/600 (11.5%)	67/540 (12.4%)	72/475 (15.2%)	85/524 (16.2%)	75/545 (13.8%)	70/484 (14.5%)	52/483 (10.8%)	63/470 (13.4%)	69/505 (13.7%)	29/581 ( 5.0%)	41/494 ( 8.3%)	82/493 (16.6%)	29/581 ( 5.0%)	47/579 ( 8.1%)	66/479 (13.8%)	75/497 (15.1%)	75/663 (11.3%)	57/533 (10.7%)	41/540 ( 7.6%)	40/586 ( 6.8%)	40/534 ( 7.5%)	51/457 (11.2%)	140/686 (20.4%)	66/470 (14.0%)
EH98(11)	36/354 (10.2%)	47/390 (12.1%)	21/474 ( 4.4%)	8/501 ( 1.6%)	42/402 (10.4%)	39/372 (10.5%)	43/374 (11.5%)	19/536 ( 3.5%)	47/376 (12.5%)	41/384 (10.7%)	23/450 ( 5.1%)	6/490 ( 1.2%)	30/410 ( 7.3%)	37/411 ( 9.0%)	41/423 ( 9.7%)	38/351 (10.8%)	39/366 (10.7%)	50/312 (16.0%)	31/418 ( 7.4%)	44/342 (12.9%)	4/689 ( 0.6%)	39/369 (10.6%)	44/528 ( 8.3%)	7/477 ( 1.5%)	44/375 (11.7%)	37/431 ( 8.6%)	36/455 ( 7.9%)	41/317 (12.9%)	53/446 (11.9%)	49/433 (11.3%)	7/477 ( 1.5%)	31/287 (10.8%)	36/333 (10.8%)	32/400 ( 8.0%)	52/301 (17.3%)	48/271 (17.7%)	47/355 (13.2%)	52/301 (17.3%)	9/488 ( 1.8%)	40/341 (11.7%)	43/370 (11.6%)	12/659 ( 1.8%)	47/362 (13.0%)	45/326 (13.8%)	39/368 (10.6%)	43/325 (13.2%)	13/379 ( 3.4%)	55/686 ( 8.0%)	44/317 (13.9%)
EH99(11)	89/368 (24.2%)	91/346 (26.3%)	69/374 (18.4%)	28/549 ( 5.1%)	99/367 (27.0%)	95/333 (28.5%)	86/359 (24.0%)	64/506 (12.6%)	93/370 (25.1%)	99/332 (29.8%)	85/383 (22.2%)	95/331 (28.7%)	90/347 (25.9%)	96/336 (28.6%)	98/381 (25.7%)	109/338 (32.2%)	92/326 (28.2%)	62/384 (16.1%)	75/386 (19.4%)	59/366 (16.1%)	77/551 (14.0%)	90/357 (25.2%)	82/511 (16.0%)	99/336 (29.5%)	84/380 (22.1%)	44/563 ( 7.8%)	98/402 (24.4%)	62/385 (16.1%)	80/462 (17.3%)	65/476 (13.7%)	101/336 (30.1%)	63/355 (17.7%)	56/360 (15.6%)	57/437 (13.0%)	70/388 (18.0%)	57/338 (16.9%)	82/336 (24.4%)	70/388 (18.0%)	94/361 (26.0%)	54/391 (13.8%)	118/334 (35.3%)	87/528 (16.5%)	67/358 (18.7%)	135/317 (42.6%)	114/309 (36.9%)	49/372 (13.2%)	50/362 (13.8%)	6/931 ( 0.6%)	1/567 ( 0.2%)
EH100(11)	31/478 ( 6.5%)	29/518 ( 5.6%)	55/393 (14.0%)	55/366 (15.0%)	28/493 ( 5.7%)	55/361 (15.2%)	62/354 (17.5%)	19/591 ( 3.2%)	60/416 (14.4%)	50/381 (13.1%)	12/559 ( 2.1%)	35/456 ( 7.7%)	63/361 (17.5%)	61/381 (16.0%)	48/408 (11.8%)	59/380 (15.5%)	60/359 (16.7%)	64/306 (20.9%)	19/531 ( 3.6%)	60/329 (18.2%)	65/544 (11.9%)	50/385 (13.0%)	26/621 ( 4.2%)	50/380 (13.2%)	64/386 (16.6%)	19/606 ( 3.1%)	58/412 (14.1%)	71/319 (22.3%)	39/543 ( 7.2%)	60/437 (13.7%)	49/380 (12.9%)	45/290 (15.5%)	58/311 (18.6%)	71/333 (21.3%)	58/299 (19.4%)	43/312 (13.8%)	58/343 (16.9%)	57/299 (19.1%)	56/366 (15.3%)	72/306 (23.5%)	51/382 (13.4%)	55/565 ( 9.7%)	47/378 (12.4%)	48/342 (14.0%)	33/445 ( 7.4%)	60/319 (18.8%)	48/313 (15.3%)	56/671 ( 8.3%)	66/307 (21.5%)
EH101(11)	38/402 ( 9.5%)	14/500 ( 2.8%)	12/519 ( 2.3%)	52/375 (13.9%)	41/423 ( 9.7%)	56/345 (16.2%)	34/412 ( 8.3%)	53/460 (11.5%)	23/499 ( 4.6%)	42/424 ( 9.9%)	61/366 (16.7%)	46/371 (12.4%)	5/515 ( 1.0%)	14/474 ( 3.0%)	21/500 ( 4.2%)	49/353 (13.9%)	48/395 (12.2%)	27/408 ( 6.6%)	17/504 ( 3.4%)	41/330 (12.4%)	34/615 ( 5.5%)	47/370 (12.7%)	45/530 ( 8.5%)	25/456 ( 5.5%)	52/407 (12.8%)	33/517 ( 6.4%)	49/411 (11.9%)	46/356 (12.9%)	24/553 ( 4.3%)	9/576 ( 1.6%)	25/456 ( 5.5%)	38/315 (12.1%)	50/284 (17.6%)	52/335 (15.5%)	54/310 (17.4%)	36/287 (12.5%)	5/513 ( 1.0%)	54/310 (17.4%)	24/467 ( 5.1%)	52/314 (16.6%)	4/521 ( 0.8%)	49/542 ( 9.0%)	48/349 (13.8%)	36/388 ( 9.3%)	20/432 ( 4.6%)	13/448 ( 2.9%)	33/334 ( 9.9%)	53/667 ( 7.9%)	53/319 (16.6%)
EH102(10)	41/399 (10.3%)	45/403 (11.2%)	46/452 (10.2%)	45/383 (11.7%)	39/410 ( 9.5%)	43/400 (10.8%)	42/392 (10.7%)	20/568 ( 3.5%)	45/399 (11.3%)	54/354 (15.3%)	50/390 (12.8%)	45/386 (11.7%)	45/400 (11.2%)	39/439 ( 8.9%)	30/470 ( 6.4%)	44/367 (12.0%)	44/400 (11.0%)	54/323 (16.7%)	51/413 (12.3%)	56/328 (17.1%)	36/582 ( 6.2%)	49/374 (13.1%)	45/527 ( 8.5%)	39/414 ( 9.4%)	41/393 (10.4%)	48/454 (10.6%)	65/392 (16.6%)	41/357 (11.5%)	44/493 ( 8.9%)	53/426 (12.4%)	33/436 ( 7.6%)	37/325 (11.4%)	29/361 ( 8.0%)	47/368 (12.8%)	46/342 (13.5%)	30/338 ( 8.9%)	33/410 ( 8.0%)	46/342 (13.5%)	15/485 ( 3.1%)	46/311 (14.8%)	50/382 (13.1%)	30/587 ( 5.1%)	48/395 (12.2%)	43/353 (12.2%)	16/462 ( 3.5%)	45/341 (13.2%)	34/336 (10.1%)	46/690 ( 6.7%)	53/327 (16.2%)
EH103(10)	72/393 (18.3%)	64/481 (13.3%)	43/532 ( 8.1%)	58/470 (12.3%)	55/499 (11.0%)	70/396 (17.7%)	66/431 (15.3%)	65/556 (11.7%)	63/495 (12.7%)	69/436 (15.8%)	73/467 (15.6%)	77/412 (18.7%)	78/423 (18.4%)	71/441 (16.1%)	75/470 (16.0%)	74/381 (19.4%)	73/410 (17.8%)	68/386 (17.6%)	78/441 (17.7%)	63/400 (15.8%)	83/597 (13.9%)	72/441 (16.3%)	71/542 (13.1%)	79/398 (19.8%)	76/421 (18.1%)	65/516 (12.6%)	76/445 (17.1%)	70/376 (18.6%)	54/577 ( 9.4%)	84/447 (18.8%)	79/398 (19.8%)	43/422 (10.2%)	63/379 (16.6%)	75/397 (18.9%)	69/383 (18.0%)	49/404 (12.1%)	13/614 ( 2.1%)	68/383 (17.8%)	32/548 ( 5.8%)	77/362 (21.3%)	53/489 (10.8%)	66/588 (11.2%)	83/401 (20.7%)	68/417 (16.3%)	75/386 (19.4%)	59/417 (14.1%)	57/383 (14.9%)	86/699 (12.3%)	71/372 (19.1%)
EH104(10)	71/391 (18.2%)	72/429 (16.8%)	51/430 (11.9%)	56/405 (13.8%)	59/433 (13.6%)	64/388 (16.5%)	65/404 (16.1%)	49/525 ( 9.3%)	58/413 (14.0%)	62/427 (14.5%)	61/398 (15.3%)	64/408 (15.7%)	62/394 (15.7%)	67/402 (16.7%)	57/449 (12.7%)	69/370 (18.6%)	22/509 ( 4.3%)	72/319 (22.6%)	65/425 (15.3%)	79/320 (24.7%)	67/555 (12.1%)	62/412 (15.0%)	61/529 (11.5%)	61/383 (15.9%)	60/448 (13.4%)	41/588 ( 7.0%)	69/421 (16.4%)	73/357 (20.4%)	33/599 ( 5.5%)	79/430 (18.4%)	62/383 (16.2%)	57/335 (17.0%)	67/336 (19.9%)	77/362 (21.3%)	73/309 (23.6%)	49/353 (13.9%)	67/394 (17.0%)	72/309 (23.3%)	56/420 (13.3%)	74/319 (23.2%)	55/438 (12.6%)	65/580 (11.2%)	70/364 (19.2%)	70/358 (19.6%)	73/374 (19.5%)	68/340 (20.0%)	50/344 (14.5%)	74/713 (10.4%)	70/315 (22.2%)
EH105(10)	44/497 ( 8.9%)	71/445 (16.0%)	43/552 ( 7.8%)	27/563 ( 4.8%)	73/437 (16.7%)	17/600 ( 2.8%)	73/441 (16.6%)	69/530 (13.0%)	50/509 ( 9.8%)	48/511 ( 9.4%)	57/504 (11.3%)	52/477 (10.9%)	40/495 ( 8.1%)	73/466 (15.7%)	65/482 (13.5%)	73/403 (18.1%)	18/600 ( 3.0%)	75/406 (18.5%)	55/489 (11.2%)	63/410 (15.4%)	69/608 (11.3%)	50/507 ( 9.9%)	85/529 (16.1%)	42/509 ( 8.3%)	74/444 (16.7%)	50/593 ( 8.4%)	48/547 ( 8.8%)	61/419 (14.6%)	74/519 (14.3%)	77/489 (15.7%)	44/507 ( 8.7%)	49/405 (12.1%)	50/419 (11.9%)	69/424 (16.3%)	64/397 (16.1%)	30/449 ( 6.7%)	70/433 (16.2%)	65/397 (16.4%)	75/432 (17.4%)	61/401 (15.2%)	31/549 ( 5.6%)	68/582 (11.7%)	67/421 (15.9%)	40/505 ( 7.9%)	70/426 (16.4%)	52/428 (12.1%)	41/416 ( 9.9%)	71/748 ( 9.5%)	45/449 (10.0%)
EH106(9)	66/702 ( 9.4%)	76/655 (11.6%)	72/700 (10.3%)	67/685 ( 9.8%)	78/721 (10.8%)	90/632 (14.2%)	76/678 (11.2%)	105/663 (15.8%)	81/714 (11.3%)	82/627 (13.1%)	66/706 ( 9.3%)	58/700 ( 8.3%)	70/650 (10.8%)	80/670 (11.9%)	20/891 ( 2.2%)	70/617 (11.3%)	68/652 (10.4%)	60/664 ( 9.0%)	72/661 (10.9%)	52/665 ( 7.8%)	94/752 (12.5%)	66/697 ( 9.5%)	102/654 (15.6%)	16/857 ( 1.9%)	53/762 ( 7.0%)	71/780 ( 9.1%)	85/647 (13.1%)	52/710 ( 7.3%)	81/712 (11.4%)	31/907 ( 3.4%)	16/857 ( 1.9%)	44/613 ( 7.2%)	55/652 ( 8.4%)	77/658 (11.7%)	65/624 (10.4%)	21/739 ( 2.8%)	66/713 ( 9.3%)	65/624 (10.4%)	93/634 (14.7%)	62/648 ( 9.6%)	34/793 ( 4.3%)	106/693 (15.3%)	78/650 (12.0%)	59/694 ( 8.5%)	89/644 (13.8%)	59/654 ( 9.0%)	52/646 ( 8.0%)	117/878 (13.3%)	44/680 ( 6.5%)
EH107(9)	25/507 ( 4.9%)	53/438 (12.1%)	27/529 ( 5.1%)	8/580 ( 1.4%)	34/500 ( 6.8%)	49/433 (11.3%)	36/469 ( 7.7%)	66/457 (14.4%)	33/493 ( 6.7%)	18/543 ( 3.3%)	44/443 ( 9.9%)	3/578 ( 0.5%)	48/395 (12.2%)	26/502 ( 5.2%)	67/412 (16.3%)	56/362 (15.5%)	28/464 ( 6.0%)	65/318 (20.4%)	66/395 (16.7%)	69/326 (21.2%)	43/612 ( 7.0%)	52/400 (13.0%)	62/498 (12.4%)	19/518 ( 3.7%)	56/418 (13.4%)	11/649 ( 1.7%)	29/528 ( 5.5%)	65/333 (19.5%)	24/596 ( 4.0%)	81/419 (19.3%)	19/518 ( 3.7%)	44/330 (13.3%)	63/312 (20.2%)	62/362 (17.1%)	64/292 (21.9%)	48/341 (14.1%)	65/377 (17.2%)	63/292 (21.6%)	11/551 ( 2.0%)	63/324 (19.4%)	20/523 ( 3.8%)	56/574 ( 9.8%)	62/370 (16.8%)	11/499 ( 2.2%)	9/537 ( 1.7%)	60/334 (18.0%)	39/347 (11.2%)	60/709 ( 8.5%)	63/300 (21.0%)
EH108(9)	66/368 (17.9%)	69/430 (16.0%)	68/397 (17.1%)	64/414 (15.5%)	75/396 (18.9%)	71/387 (18.3%)	72/362 (19.9%)	54/535 (10.1%)	83/389 (21.3%)	75/385 (19.5%)	75/398 (18.8%)	79/378 (20.9%)	73/380 (19.2%)	81/380 (21.3%)	67/415 (16.1%)	71/353 (20.1%)	73/386 (18.9%)	57/374 (15.2%)	63/408 (15.4%)	42/462 ( 9.1%)	84/550 (15.3%)	69/368 (18.8%)	75/518 (14.5%)	75/383 (19.6%)	65/413 (15.7%)	84/448 (18.8%)	71/417 (17.0%)	73/366 (19.9%)	67/492 (13.6%)	79/456 (17.3%)	75/383 (19.6%)	62/339 (18.3%)	55/349 (15.8%)	68/371 (18.3%)	54/390 (13.8%)	45/408 (11.0%)	72/400 (18.0%)	54/390 (13.8%)	74/377 (19.6%)	56/371 (15.1%)	73/388 (18.8%)	70/549 (12.8%)	70/371 (18.9%)	76/350 (21.7%)	73/335 (21.8%)	70/355 (19.7%)	58/345 (16.8%)	18/879 ( 2.0%)	55/378 (14.6%)
EH109(9)	80/402 (19.9%)	70/423 (16.5%)	73/429 (17.0%)	67/408 (16.4%)	58/465 (12.5%)	71/408 (17.4%)	69/401 (17.2%)	66/528 (12.5%)	88/399 (22.1%)	77/398 (19.3%)	73/419 (17.4%)	75/399 (18.8%)	71/402 (17.7%)	69/384 (18.0%)	71/435 (16.3%)	71/385 (18.4%)	74/408 (18.1%)	78/332 (23.5%)	80/416 (19.2%)	73/363 (20.1%)	66/584 (11.3%)	72/394 (18.3%)	65/535 (12.1%)	74/414 (17.9%)	62/437 (14.2%)	77/488 (15.8%)	72/414 (17.4%)	73/371 (19.7%)	75/461 (16.3%)	78/441 (17.7%)	73/417 (17.5%)	58/363 (16.0%)	71/345 (20.6%)	64/372 (17.2%)	70/329 (21.3%)	55/363 (15.2%)	77/396 (19.4%)	69/347 (19.9%)	71/417 (17.0%)	73/351 (20.8%)	78/381 (20.5%)	69/576 (12.0%)	25/545 ( 4.6%)	37/452 ( 8.2%)	75/388 (19.3%)	65/370 (17.6%)	59/368 (16.0%)	9/909 ( 1.0%)	61/352 (17.3%)
EH110(8)	61/552 (11.1%)	64/549 (11.7%)	37/622 ( 5.9%)	77/464 (16.6%)	61/550 (11.1%)	44/570 ( 7.7%)	60/528 (11.4%)	87/559 (15.6%)	84/445 (18.9%)	57/522 (10.9%)	75/499 (15.0%)	74/516 (14.3%)	42/568 ( 7.4%)	69/486 (14.2%)	74/522 (14.2%)	48/551 ( 8.7%)	42/566 ( 7.4%)	66/439 (15.0%)	69/458 (15.1%)	27/593 ( 4.6%)	84/593 (14.2%)	45/559 ( 8.1%)	72/622 (11.6%)	11/668 ( 1.6%)	59/573 (10.3%)	82/528 (15.5%)	41/612 ( 6.7%)	62/447 (13.9%)	50/614 ( 8.1%)	88/493 (17.8%)	11/668 ( 1.6%)	55/430 (12.8%)	22/566 ( 3.9%)	64/505 (12.7%)	60/470 (12.8%)	28/513 ( 5.5%)	48/554 ( 8.7%)	60/470 (12.8%)	59/536 (11.0%)	61/496 (12.3%)	55/528 (10.4%)	18/838 ( 2.1%)	44/570 ( 7.7%)	26/568 ( 4.6%)	62/493 (12.6%)	6/647 ( 0.9%)	21/559 ( 3.8%)	72/787 ( 9.1%)	36/545 ( 6.6%)
EH111(8)	18/498 ( 3.6%)	3/577 ( 0.5%)	16/546 ( 2.9%)	38/443 ( 8.6%)	3/585 ( 0.5%)	3/553 ( 0.5%)	60/365 (16.4%)	45/522 ( 8.6%)	37/465 ( 8.0%)	5/549 ( 0.9%)	48/409 (11.7%)	3/546 ( 0.5%)	3/553 ( 0.5%)	52/424 (12.3%)	49/440 (11.1%)	44/394 (11.2%)	3/553 ( 0.5%)	50/334 (15.0%)	10/568 ( 1.8%)	54/325 (16.6%)	31/656 ( 4.7%)	17/518 ( 3.3%)	59/489 (12.1%)	19/478 ( 4.0%)	57/390 (14.6%)	48/499 ( 9.6%)	49/417 (11.8%)	61/347 (17.6%)	40/507 ( 7.9%)	65/435 (14.9%)	19/478 ( 4.0%)	39/301 (13.0%)	59/298 (19.8%)	58/369 (15.7%)	65/320 (20.3%)	46/295 (15.6%)	2/551 ( 0.4%)	64/320 (20.0%)	43/420 (10.2%)	64/321 (19.9%)	55/357 (15.4%)	56/540 (10.4%)	60/387 (15.5%)	50/318 (15.7%)	57/345 (16.5%)	49/353 (13.9%)	51/293 (17.4%)	57/690 ( 8.3%)	60/333 (18.0%)
EH112(8)	75/567 (13.2%)	97/570 (17.0%)	92/557 (16.5%)	68/577 (11.8%)	77/565 (13.6%)	73/579 (12.6%)	77/565 (13.6%)	63/708 ( 8.9%)	82/570 (14.4%)	86/545 (15.8%)	77/595 (12.9%)	76/562 (13.5%)	72/577 (12.5%)	85/569 (14.9%)	84/581 (14.5%)	71/545 (13.0%)	75/573 (13.1%)	57/595 ( 9.6%)	75/576 (13.0%)	52/617 ( 8.4%)	182/532 (34.2%)	80/568 (14.1%)	89/604 (14.7%)	71/596 (11.9%)	78/584 (13.4%)	92/610 (15.1%)	85/573 (14.8%)	71/570 (12.5%)	99/600 (16.5%)	88/592 (14.9%)	71/596 (11.9%)	43/564 ( 7.6%)	50/593 ( 8.4%)	78/558 (14.0%)	57/583 ( 9.8%)	49/564 ( 8.7%)	69/618 (11.2%)	57/583 ( 9.8%)	86/592 (14.5%)	63/565 (11.2%)	78/562 (13.9%)	94/703 (13.4%)	59/571 (10.3%)	68/555 (12.3%)	74/583 (12.7%)	52/596 ( 8.7%)	49/575 ( 8.5%)	45/1003 ( 4.5%)	55/571 ( 9.6%)
EH113(8)	34/464 ( 7.3%)	21/494 ( 4.3%)	31/476 ( 6.5%)	54/389 (13.9%)	21/494 ( 4.3%)	45/370 (12.2%)	25/431 ( 5.8%)	50/476 (10.5%)	30/467 ( 6.4%)	48/368 (13.0%)	25/483 ( 5.2%)	48/384 (12.5%)	24/467 ( 5.1%)	27/472 ( 5.7%)	57/404 (14.1%)	56/341 (16.4%)	23/467 ( 4.9%)	57/325 (17.5%)	59/367 (16.1%)	54/324 (16.7%)	41/618 ( 6.6%)	58/333 (17.4%)	41/554 ( 7.4%)	8/534 ( 1.5%)	66/367 (18.0%)	3/636 ( 0.5%)	64/394 (16.2%)	62/323 (19.2%)	54/467 (11.6%)	48/486 ( 9.9%)	8/534 ( 1.5%)	45/291 (15.5%)	50/279 (17.9%)	11/502 ( 2.2%)	53/328 (16.2%)	49/278 (17.6%)	55/367 (15.0%)	53/328 (16.2%)	41/412 (10.0%)	60/323 (18.6%)	13/518 ( 2.5%)	49/545 ( 9.0%)	54/351 (15.4%)	61/300 (20.3%)	52/325 (16.0%)	24/446 ( 5.4%)	39/321 (12.1%)	65/669 ( 9.7%)	48/329 (14.6%)
EH114(8)	17/581 ( 2.9%)	72/404 (17.8%)	68/413 (16.5%)	55/489 (11.2%)	27/605 ( 4.5%)	71/435 (16.3%)	67/393 (17.0%)	46/575 ( 8.0%)	33/576 ( 5.7%)	68/431 (15.8%)	60/458 (13.1%)	69/416 (16.6%)	73/434 (16.8%)	67/435 (15.4%)	63/463 (13.6%)	73/394 (18.5%)	72/426 (16.9%)	78/361 (21.6%)	11/655 ( 1.7%)	72/359 (20.1%)	88/567 (15.5%)	18/586 ( 3.1%)	79/515 (15.3%)	74/414 (17.9%)	42/556 ( 7.6%)	68/480 (14.2%)	63/482 (13.1%)	71/352 (20.2%)	54/577 ( 9.4%)	71/445 (16.0%)	74/414 (17.9%)	46/377 (12.2%)	63/371 (17.0%)	68/412 (16.5%)	68/363 (18.7%)	43/385 (11.2%)	61/416 (14.7%)	67/363 (18.5%)	27/544 ( 5.0%)	79/358 (22.1%)	71/422 (16.8%)	69/603 (11.4%)	70/403 (17.4%)	32/487 ( 6.6%)	79/381 (20.7%)	61/416 (14.7%)	46/392 (11.7%)	70/725 ( 9.7%)	67/351 (19.1%)
EH115(8)	53/356 (14.9%)	63/406 (15.5%)	60/381 (15.7%)	45/430 (10.5%)	59/383 (15.4%)	65/337 (19.3%)	66/342 (19.3%)	11/621 ( 1.8%)	65/372 (17.5%)	65/348 (18.7%)	60/382 (15.7%)	56/353 (15.9%)	67/339 (19.8%)	58/352 (16.5%)	68/404 (16.8%)	61/331 (18.4%)	65/345 (18.8%)	56/333 (16.8%)	62/369 (16.8%)	62/333 (18.6%)	47/520 ( 9.0%)	72/339 (21.2%)	54/486 (11.1%)	65/343 (19.0%)	60/384 (15.6%)	41/532 ( 7.7%)	48/400 (12.0%)	49/363 (13.5%)	38/538 ( 7.1%)	63/451 (14.0%)	65/343 (19.0%)	49/265 (18.5%)	47/288 (16.3%)	60/356 (16.9%)	56/338 (16.6%)	44/301 (14.6%)	60/341 (17.6%)	56/338 (16.6%)	50/372 (13.4%)	50/371 (13.5%)	59/361 (16.3%)	63/530 (11.9%)	61/336 (18.2%)	56/318 (17.6%)	65/333 (19.5%)	51/304 (16.8%)	21/381 ( 5.5%)	55/707 ( 7.8%)	49/332 (14.8%)
EH116(7)	27/487 ( 5.5%)	66/443 (14.9%)	30/516 ( 5.8%)	60/398 (15.1%)	55/431 (12.8%)	63/416 (15.1%)	24/528 ( 4.5%)	42/564 ( 7.4%)	33/521 ( 6.3%)	63/409 (15.4%)	70/405 (17.3%)	53/419 (12.6%)	57/429 (13.3%)	42/513 ( 8.2%)	70/419 (16.7%)	56/395 (14.2%)	60/425 (14.1%)	63/348 (18.1%)	32/525 ( 6.1%)	62/355 (17.5%)	76/567 (13.4%)	0/602 ( 0.0%)	64/485 (13.2%)	31/470 ( 6.6%)	52/455 (11.4%)	53/547 ( 9.7%)	73/438 (16.7%)	62/356 (17.4%)	54/515 (10.5%)	55/469 (11.7%)	31/470 ( 6.6%)	43/357 (12.0%)	22/466 ( 4.7%)	44/451 ( 9.8%)	66/361 (18.3%)	45/342 (13.2%)	59/421 (14.0%)	67/361 (18.6%)	29/522 ( 5.6%)	61/347 (17.6%)	36/484 ( 7.4%)	71/573 (12.4%)	66/395 (16.7%)	64/365 (17.5%)	57/374 (15.2%)	69/334 (20.7%)	38/371 (10.2%)	78/693 (11.3%)	61/352 (17.3%)
EH117(6)	5/773 ( 0.6%)	80/529 (15.1%)	63/587 (10.7%)	30/685 ( 4.4%)	76/528 (14.4%)	58/511 (11.4%)	80/518 (15.4%)	106/548 (19.3%)	21/729 ( 2.9%)	27/692 ( 3.9%)	48/652 ( 7.4%)	13/743 ( 1.7%)	42/604 ( 7.0%)	18/729 ( 2.5%)	69/541 (12.8%)	79/517 (15.3%)	39/648 ( 6.0%)	42/613 ( 6.9%)	52/641 ( 8.1%)	51/593 ( 8.6%)	93/604 (15.4%)	75/550 (13.6%)	65/739 ( 8.8%)	50/596 ( 8.4%)	84/530 (15.8%)	101/541 (18.7%)	58/634 ( 9.1%)	52/589 ( 8.8%)	59/692 ( 8.5%)	61/649 ( 9.4%)	74/549 (13.5%)	53/514 (10.3%)	50/534 ( 9.4%)	67/564 (11.9%)	17/690 ( 2.5%)	51/513 ( 9.9%)	52/619 ( 8.4%)	17/690 ( 2.5%)	75/534 (14.0%)	22/668 ( 3.3%)	42/652 ( 6.4%)	20/890 ( 2.2%)	53/601 ( 8.8%)	40/616 ( 6.5%)	53/606 ( 8.7%)	18/653 ( 2.8%)	55/522 (10.5%)	25/1047 ( 2.4%)	51/555 ( 9.2%)
EH118(6)	69/359 (19.2%)	39/514 ( 7.6%)	39/507 ( 7.7%)	50/406 (12.3%)	58/458 (12.7%)	33/485 ( 6.8%)	41/455 ( 9.0%)	11/656 ( 1.7%)	33/524 ( 6.3%)	4/589 ( 0.7%)	7/608 ( 1.2%)	2/585 ( 0.3%)	33/493 ( 6.7%)	35/505 ( 6.9%)	58/450 (12.9%)	60/383 (15.7%)	32/493 ( 6.5%)	72/375 (19.2%)	8/602 ( 1.3%)	51/393 (13.0%)	71/554 (12.8%)	62/382 (16.2%)	8/721 ( 1.1%)	37/473 ( 7.8%)	35/502 ( 7.0%)	61/500 (12.2%)	36/537 ( 6.7%)	57/388 (14.7%)	36/548 ( 6.6%)	39/524 ( 7.4%)	15/537 ( 2.8%)	25/428 ( 5.8%)	59/355 (16.6%)	20/539 ( 3.7%)	59/375 (15.7%)	50/325 (15.4%)	50/432 (11.6%)	59/375 (15.7%)	29/504 ( 5.8%)	62/369 (16.8%)	38/460 ( 8.3%)	70/546 (12.8%)	71/362 (19.6%)	53/364 (14.6%)	61/360 (16.9%)	56/379 (14.8%)	46/369 (12.5%)	66/701 ( 9.4%)	54/339 (15.9%)
EH119(6)	68/338 (20.1%)	69/344 (20.1%)	69/356 (19.4%)	56/364 (15.4%)	77/348 (22.1%)	69/339 (20.4%)	83/327 (25.4%)	32/546 ( 5.9%)	59/374 (15.8%)	66/328 (20.1%)	72/364 (19.8%)	68/347 (19.6%)	64/336 (19.0%)	70/363 (19.3%)	70/374 (18.7%)	74/314 (23.6%)	68/339 (20.1%)	57/348 (16.4%)	64/365 (17.5%)	57/329 (17.3%)	62/526 (11.8%)	57/346 (16.5%)	43/559 ( 7.7%)	68/348 (19.5%)	137/353 (38.8%)	51/515 ( 9.9%)	67/372 (18.0%)	43/384 (11.2%)	40/502 ( 8.0%)	56/411 (13.6%)	68/348 (19.5%)	48/289 (16.6%)	50/314 (15.9%)	19/493 ( 3.9%)	57/334 (17.1%)	42/311 (13.5%)	64/349 (18.3%)	57/334 (17.1%)	68/365 (18.6%)	48/356 (13.5%)	63/342 (18.4%)	50/550 ( 9.1%)	60/346 (17.3%)	75/304 (24.7%)	72/304 (23.7%)	55/323 (17.0%)	35/338 (10.4%)	7/845 ( 0.8%)	40/343 (11.7%)
EH120(5)	69/360 (19.2%)	65/393 (16.5%)	61/392 (15.6%)	54/380 (14.2%)	63/409 (15.4%)	64/379 (16.9%)	63/391 (16.1%)	63/507 (12.4%)	75/383 (19.6%)	61/365 (16.7%)	63/378 (16.7%)	67/385 (17.4%)	61/367 (16.6%)	33/498 ( 6.6%)	62/450 (13.8%)	72/349 (20.6%)	63/377 (16.7%)	70/348 (20.1%)	67/405 (16.5%)	55/399 (13.8%)	70/537 (13.0%)	59/376 (15.7%)	65/520 (12.5%)	76/349 (21.8%)	44/488 ( 9.0%)	23/608 ( 3.8%)	70/418 (16.7%)	66/345 (19.1%)	23/621 ( 3.7%)	59/455 (13.0%)	77/349 (22.1%)	56/337 (16.6%)	61/303 (20.1%)	41/481 ( 8.5%)	61/344 (17.7%)	48/334 (14.4%)	75/365 (20.5%)	61/344 (17.7%)	69/366 (18.9%)	48/371 (12.9%)	65/390 (16.7%)	60/552 (10.9%)	69/358 (19.3%)	62/325 (19.1%)	59/348 (17.0%)	61/326 (18.7%)	55/312 (17.6%)	78/691 (11.3%)	55/357 (15.4%)
EH121(5)	55/339 (16.2%)	53/400 (13.2%)	22/472 ( 4.7%)	34/409 ( 8.3%)	33/432 ( 7.6%)	52/341 (15.2%)	50/326 (15.3%)	45/440 (10.2%)	57/357 (16.0%)	60/325 (18.5%)	54/357 (15.1%)	26/418 ( 6.2%)	52/341 (15.2%)	24/419 ( 5.7%)	53/425 (12.5%)	45/348 (12.9%)	49/329 (14.9%)	45/345 (13.0%)	46/362 (12.7%)	41/341 (12.0%)	42/558 ( 7.5%)	52/327 (15.9%)	56/477 (11.7%)	43/352 (12.2%)	46/382 (12.0%)	48/462 (10.4%)	18/514 ( 3.5%)	39/358 (10.9%)	8/589 ( 1.4%)	59/392 (15.1%)	44/352 (12.5%)	26/328 ( 7.9%)	51/274 (18.6%)	23/455 ( 5.1%)	45/352 (12.8%)	25/340 ( 7.4%)	55/324 (17.0%)	45/352 (12.8%)	27/437 ( 6.2%)	43/337 (12.8%)	59/352 (16.8%)	45/570 ( 7.9%)	52/327 (15.9%)	45/314 (14.3%)	54/305 (17.7%)	51/276 (18.5%)	48/287 (16.7%)	37/718 ( 5.2%)	50/287 (17.4%)
EH122(5)	34/897 ( 3.8%)	73/788 ( 9.3%)	66/763 ( 8.7%)	76/730 (10.4%)	76/774 ( 9.8%)	62/819 ( 7.6%)	72/811 ( 8.9%)	101/766 (13.2%)	51/872 ( 5.8%)	69/792 ( 8.7%)	83/809 (10.3%)	68/750 ( 9.1%)	60/820 ( 7.3%)	75/763 ( 9.8%)	81/804 (10.1%)	76/722 (10.5%)	47/848 ( 5.5%)	77/744 (10.3%)	67/785 ( 8.5%)	77/728 (10.6%)	85/884 ( 9.6%)	74/769 ( 9.6%)	96/789 (12.2%)	82/777 (10.6%)	69/823 ( 8.4%)	104/745 (14.0%)	90/797 (11.3%)	79/732 (10.8%)	100/759 (13.2%)	84/836 (10.0%)	84/779 (10.8%)	54/738 ( 7.3%)	58/710 ( 8.2%)	70/742 ( 9.4%)	72/739 ( 9.7%)	44/743 ( 5.9%)	73/757 ( 9.6%)	72/739 ( 9.7%)	54/859 ( 6.3%)	69/734 ( 9.4%)	63/794 ( 7.9%)	113/782 (14.5%)	72/776 ( 9.3%)	69/733 ( 9.4%)	63/821 ( 7.7%)	64/757 ( 8.5%)	49/773 ( 6.3%)	104/1010 (10.3%)	61/737 ( 8.3%)
EH123(4)	80/403 (19.9%)	71/423 (16.8%)	72/431 (16.7%)	67/408 (16.4%)	76/429 (17.7%)	71/409 (17.4%)	71/396 (17.9%)	66/528 (12.5%)	89/399 (22.3%)	77/399 (19.3%)	73/419 (17.4%)	75/400 (18.8%)	71/403 (17.6%)	69/388 (17.8%)	69/435 (15.9%)	71/386 (18.4%)	74/409 (18.1%)	78/333 (23.4%)	80/416 (19.2%)	73/364 (20.1%)	66/585 (11.3%)	72/395 (18.2%)	65/535 (12.1%)	74/415 (17.8%)	62/437 (14.2%)	28/636 ( 4.4%)	72/415 (17.3%)	73/372 (19.6%)	75/462 (16.2%)	78/442 (17.6%)	73/418 (17.5%)	58/364 (15.9%)	71/346 (20.5%)	64/373 (17.2%)	70/330 (21.2%)	55/364 (15.1%)	77/397 (19.4%)	69/348 (19.8%)	71/417 (17.0%)	73/352 (20.7%)	78/382 (20.4%)	69/576 (12.0%)	25/546 ( 4.6%)	37/453 ( 8.2%)	75/389 (19.3%)	65/371 (17.5%)	59/369 (16.0%)	9/910 ( 1.0%)	61/353 (17.3%)
EH124(4)	28/605 ( 4.6%)	52/524 ( 9.9%)	62/512 (12.1%)	44/564 ( 7.8%)	61/526 (11.6%)	54/513 (10.5%)	49/524 ( 9.4%)	143/424 (33.7%)	76/462 (16.5%)	33/609 ( 5.4%)	79/472 (16.7%)	60/457 (13.1%)	55/513 (10.7%)	68/472 (14.4%)	28/643 ( 4.4%)	63/459 (13.7%)	25/617 ( 4.1%)	48/512 ( 9.4%)	55/511 (10.8%)	15/598 ( 2.5%)	78/658 (11.9%)	66/444 (14.9%)	69/600 (11.5%)	59/451 (13.1%)	69/501 (13.8%)	93/482 (19.3%)	58/574 (10.1%)	19/611 ( 3.1%)	130/413 (31.5%)	51/602 ( 8.5%)	59/451 (13.1%)	3/584 ( 0.5%)	17/573 ( 3.0%)	54/526 (10.3%)	37/527 ( 7.0%)	29/493 ( 5.9%)	61/492 (12.4%)	37/527 ( 7.0%)	57/530 (10.8%)	19/600 ( 3.2%)	27/602 ( 4.5%)	9/847 ( 1.1%)	60/516 (11.6%)	15/613 ( 2.4%)	84/416 (20.2%)	51/474 (10.8%)	51/422 (12.1%)	77/729 (10.6%)	49/489 (10.0%)
EH125(4)	34/418 ( 8.1%)	53/360 (14.7%)	54/379 (14.2%)	37/404 ( 9.2%)	59/374 (15.8%)	52/356 (14.6%)	53/337 (15.7%)	44/420 (10.5%)	52/370 (14.1%)	56/363 (15.4%)	56/357 (15.7%)	56/338 (16.6%)	52/356 (14.6%)	49/352 (13.9%)	47/397 (11.8%)	57/334 (17.1%)	54/329 (16.4%)	51/314 (16.2%)	52/364 (14.3%)	49/324 (15.1%)	48/543 ( 8.8%)	36/385 ( 9.4%)	49/493 ( 9.9%)	60/349 (17.2%)	44/416 (10.6%)	26/537 ( 4.8%)	56/379 (14.8%)	30/363 ( 8.3%)	46/467 ( 9.9%)	19/533 ( 3.6%)	65/348 (18.7%)	44/283 (15.5%)	56/274 (20.4%)	56/330 (17.0%)	49/336 (14.6%)	47/274 (17.2%)	36/409 ( 8.8%)	49/336 (14.6%)	59/335 (17.6%)	46/340 (13.5%)	52/362 (14.4%)	54/511 (10.6%)	46/344 (13.4%)	49/322 (15.2%)	53/344 (15.4%)	43/307 (14.0%)	37/297 (12.5%)	21/764 ( 2.7%)	44/303 (14.5%)
EH126(4)	60/505 (11.9%)	68/535 (12.7%)	77/490 (15.7%)	27/634 ( 4.3%)	78/508 (15.4%)	75/452 (16.6%)	70/499 (14.0%)	29/687 ( 4.2%)	40/622 ( 6.4%)	62/521 (11.9%)	70/492 (14.2%)	42/526 ( 8.0%)	63/453 (13.9%)	73/479 (15.2%)	30/643 ( 4.7%)	58/486 (11.9%)	62/451 (13.7%)	51/496 (10.3%)	5/721 ( 0.7%)	61/478 (12.8%)	77/627 (12.3%)	55/576 ( 9.5%)	76/558 (13.6%)	8/682 ( 1.2%)	34/637 ( 5.3%)	76/522 (14.6%)	81/475 (17.1%)	51/490 (10.4%)	65/546 (11.9%)	83/470 (17.7%)	57/504 (11.3%)	54/447 (12.1%)	53/421 (12.6%)	65/472 (13.8%)	52/495 (10.5%)	55/429 (12.8%)	64/500 (12.8%)	52/495 (10.5%)	41/563 ( 7.3%)	59/466 (12.7%)	32/596 ( 5.4%)	92/593 (15.5%)	81/455 (17.8%)	55/452 (12.2%)	76/440 (17.3%)	64/433 (14.8%)	40/476 ( 8.4%)	88/772 (11.4%)	34/534 ( 6.4%)
EH127(4)	63/411 (15.3%)	69/417 (16.5%)	65/412 (15.8%)	66/389 (17.0%)	67/415 (16.1%)	57/436 (13.1%)	70/391 (17.9%)	60/521 (11.5%)	61/418 (14.6%)	61/396 (15.4%)	36/521 ( 6.9%)	64/387 (16.5%)	68/388 (17.5%)	72/392 (18.4%)	19/590 ( 3.2%)	61/423 (14.4%)	54/367 (14.7%)	72/338 (21.3%)	62/417 (14.9%)	61/334 (18.3%)	16/743 ( 2.2%)	43/472 ( 9.1%)	61/529 (11.5%)	40/508 ( 7.9%)	56/438 (12.8%)	64/517 (12.4%)	63/441 (14.3%)	75/336 (22.3%)	65/497 (13.1%)	52/517 (10.1%)	60/438 (13.7%)	45/326 (13.8%)	54/329 (16.4%)	68/349 (19.5%)	69/317 (21.8%)	44/357 (12.3%)	16/555 ( 2.9%)	69/317 (21.8%)	72/387 (18.6%)	72/318 (22.6%)	59/413 (14.3%)	60/571 (10.5%)	48/448 (10.7%)	55/391 (14.1%)	64/365 (17.5%)	54/377 (14.3%)	51/349 (14.6%)	68/708 ( 9.6%)	62/320 (19.4%)
EH128(4)	22/574 ( 3.8%)	54/461 (11.7%)	48/444 (10.8%)	58/422 (13.7%)	49/474 (10.3%)	77/397 (19.4%)	64/398 (16.1%)	43/575 ( 7.5%)	56/411 (13.6%)	74/397 (18.6%)	71/398 (17.8%)	60/429 (14.0%)	74/387 (19.1%)	43/498 ( 8.6%)	68/446 (15.2%)	74/412 (18.0%)	70/380 (18.4%)	78/341 (22.9%)	63/422 (14.9%)	75/359 (20.9%)	70/595 (11.8%)	62/395 (15.7%)	71/536 (13.2%)	69/380 (18.2%)	65/438 (14.8%)	35/610 ( 5.7%)	76/444 (17.1%)	75/361 (20.8%)	46/559 ( 8.2%)	92/426 (21.6%)	69/380 (18.2%)	40/384 (10.4%)	51/408 (12.5%)	71/412 (17.2%)	81/336 (24.1%)	37/378 ( 9.8%)	15/592 ( 2.5%)	80/336 (23.8%)	28/567 ( 4.9%)	79/334 (23.7%)	60/400 (15.0%)	38/702 ( 5.4%)	79/388 (20.4%)	9/578 ( 1.6%)	63/388 (16.2%)	66/382 (17.3%)	51/351 (14.5%)	80/699 (11.4%)	63/339 (18.6%)
EH129(3)	70/518 (13.5%)	21/740 ( 2.8%)	62/543 (11.4%)	39/664 ( 5.9%)	24/730 ( 3.3%)	82/542 (15.1%)	70/528 (13.3%)	93/557 (16.7%)	69/544 (12.7%)	44/629 ( 7.0%)	24/721 ( 3.3%)	23/680 ( 3.4%)	72/563 (12.8%)	50/614 ( 8.1%)	6/792 ( 0.8%)	69/521 (13.2%)	25/685 ( 3.6%)	35/591 ( 5.9%)	80/540 (14.8%)	56/555 (10.1%)	8/929 ( 0.9%)	22/717 ( 3.1%)	78/625 (12.5%)	25/698 ( 3.6%)	82/536 (15.3%)	73/590 (12.4%)	66/543 (12.2%)	67/487 (13.8%)	92/564 (16.3%)	72/565 (12.7%)	30/687 ( 4.4%)	11/640 ( 1.7%)	49/515 ( 9.5%)	36/646 ( 5.6%)	42/588 ( 7.1%)	47/548 ( 8.6%)	61/565 (10.8%)	42/588 ( 7.1%)	36/664 ( 5.4%)	51/523 ( 9.8%)	12/739 ( 1.6%)	103/629 (16.4%)	18/695 ( 2.6%)	21/666 ( 3.2%)	67/497 (13.5%)	41/599 ( 6.8%)	9/650 ( 1.4%)	86/750 (11.5%)	27/595 ( 4.5%)
EH130(2)	77/532 (14.5%)	53/644 ( 8.2%)	43/636 ( 6.8%)	72/543 (13.3%)	73/592 (12.3%)	72/535 (13.5%)	74/559 (13.2%)	82/604 (13.6%)	94/506 (18.6%)	45/647 ( 7.0%)	76/554 (13.7%)	70/561 (12.5%)	78/533 (14.6%)	48/653 ( 7.4%)	73/552 (13.2%)	67/520 (12.9%)	74/532 (13.9%)	68/512 (13.3%)	70/561 (12.5%)	30/638 ( 4.7%)	113/617 (18.3%)	69/546 (12.6%)	112/569 (19.7%)	71/549 (12.9%)	70/544 (12.9%)	79/625 (12.6%)	73/556 (13.1%)	67/544 (12.3%)	104/557 (18.7%)	99/539 (18.4%)	32/655 ( 4.9%)	51/518 ( 9.8%)	59/510 (11.6%)	76/575 (13.2%)	67/506 (13.2%)	57/507 (11.2%)	79/530 (14.9%)	68/506 (13.4%)	84/554 (15.2%)	28/646 ( 4.3%)	66/554 (11.9%)	67/731 ( 9.2%)	98/508 (19.3%)	50/578 ( 8.7%)	49/604 ( 8.1%)	63/532 (11.8%)	53/510 (10.4%)	7/1083 ( 0.6%)	45/617 ( 7.3%)
EH131(2)	70/573 (12.2%)	84/517 (16.2%)	95/533 (17.8%)	69/599 (11.5%)	77/587 (13.1%)	43/662 ( 6.5%)	80/528 (15.2%)	71/640 (11.1%)	79/535 (14.8%)	34/693 ( 4.9%)	90/547 (16.5%)	72/529 (13.6%)	75/548 (13.7%)	87/549 (15.8%)	84/601 (14.0%)	75/524 (14.3%)	42/669 ( 6.3%)	66/536 (12.3%)	85/523 (16.3%)	60/528 (11.4%)	110/610 (18.0%)	68/534 (12.7%)	115/592 (19.4%)	60/640 ( 9.4%)	76/540 (14.1%)	52/733 ( 7.1%)	83/543 (15.3%)	66/569 (11.6%)	67/683 ( 9.8%)	95/552 (17.2%)	60/640 ( 9.4%)	51/516 ( 9.9%)	37/595 ( 6.2%)	38/667 ( 5.7%)	61/497 (12.3%)	49/534 ( 9.2%)	71/557 (12.7%)	61/497 (12.3%)	78/534 (14.6%)	54/534 (10.1%)	84/542 (15.5%)	86/710 (12.1%)	78/520 (15.0%)	70/554 (12.6%)	82/509 (16.1%)	62/528 (11.7%)	58/521 (11.1%)	89/802 (11.1%)	58/555 (10.5%)
EH132(2)	72/406 (17.7%)	67/434 (15.4%)	63/451 (14.0%)	51/455 (11.2%)	71/401 (17.7%)	69/366 (18.9%)	68/385 (17.7%)	62/456 (13.6%)	38/525 ( 7.2%)	57/446 (12.8%)	66/414 (15.9%)	42/490 ( 8.6%)	65/371 (17.5%)	77/395 (19.5%)	68/434 (15.7%)	68/383 (17.8%)	64/371 (17.3%)	59/384 (15.4%)	59/441 (13.4%)	41/458 ( 9.0%)	85/543 (15.7%)	67/396 (16.9%)	76/532 (14.3%)	69/382 (18.1%)	64/421 (15.2%)	54/564 ( 9.6%)	67/418 (16.0%)	70/392 (17.9%)	75/499 (15.0%)	71/496 (14.3%)	69/382 (18.1%)	63/359 (17.5%)	47/379 (12.4%)	31/552 ( 5.6%)	57/395 (14.4%)	55/371 (14.8%)	67/393 (17.0%)	58/395 (14.7%)	77/408 (18.9%)	57/383 (14.9%)	34/530 ( 6.4%)	86/545 (15.8%)	68/381 (17.8%)	40/468 ( 8.5%)	51/451 (11.3%)	54/375 (14.4%)	37/435 ( 8.5%)	60/736 ( 8.2%)	45/436 (10.3%)
EH133(2)	48/609 ( 7.9%)	66/575 (11.5%)	54/614 ( 8.8%)	46/638 ( 7.2%)	39/687 ( 5.7%)	28/698 ( 4.0%)	79/538 (14.7%)	137/524 (26.1%)	43/654 ( 6.6%)	64/588 (10.9%)	67/577 (11.6%)	62/529 (11.7%)	57/564 (10.1%)	67/568 (11.8%)	33/732 ( 4.5%)	30/658 ( 4.6%)	28/693 ( 4.0%)	16/701 ( 2.3%)	71/591 (12.0%)	24/640 ( 3.8%)	71/690 (10.3%)	41/628 ( 6.5%)	83/632 (13.1%)	66/562 (11.7%)	69/590 (11.7%)	103/562 (18.3%)	26/733 ( 3.5%)	76/484 (15.7%)	121/523 (23.1%)	81/559 (14.5%)	63/558 (11.3%)	58/500 (11.6%)	27/648 ( 4.2%)	29/689 ( 4.2%)	13/712 ( 1.8%)	54/507 (10.7%)	59/538 (11.0%)	13/712 ( 1.8%)	72/563 (12.8%)	62/533 (11.6%)	43/645 ( 6.7%)	83/653 (12.7%)	66/538 (12.3%)	36/651 ( 5.5%)	74/485 (15.3%)	22/684 ( 3.2%)	43/534 ( 8.1%)	82/825 ( 9.9%)	53/578 ( 9.2%)
EH134(2)	29/474 ( 6.1%)	57/370 (15.4%)	64/377 (17.0%)	61/373 (16.4%)	52/373 (13.9%)	58/348 (16.7%)	53/368 (14.4%)	52/467 (11.1%)	62/390 (15.9%)	57/377 (15.1%)	59/384 (15.4%)	63/353 (17.8%)	54/366 (14.8%)	57/378 (15.1%)	48/389 (12.3%)	52/382 (13.6%)	59/350 (16.9%)	54/345 (15.7%)	61/380 (16.1%)	56/324 (17.3%)	46/602 ( 7.6%)	3/548 ( 0.5%)	54/521 (10.4%)	52/381 (13.6%)	53/398 (13.3%)	64/467 (13.7%)	30/519 ( 5.8%)	50/379 (13.2%)	59/447 (13.2%)	63/430 (14.7%)	60/368 (16.3%)	47/301 (15.6%)	48/324 (14.8%)	61/341 (17.9%)	46/342 (13.5%)	53/289 (18.3%)	56/348 (16.1%)	46/342 (13.5%)	62/356 (17.4%)	55/334 (16.5%)	59/354 (16.7%)	57/533 (10.7%)	68/351 (19.4%)	47/328 (14.3%)	56/345 (16.2%)	68/285 (23.9%)	42/311 (13.5%)	58/701 ( 8.3%)	53/323 (16.4%)
EH135(2)	39/486 ( 8.0%)	57/388 (14.7%)	69/381 (18.1%)	66/381 (17.3%)	45/483 ( 9.3%)	66/359 (18.4%)	68/388 (17.5%)	57/480 (11.9%)	42/486 ( 8.6%)	64/369 (17.3%)	66/389 (17.0%)	66/383 (17.2%)	62/368 (16.8%)	54/420 (12.9%)	50/403 (12.4%)	71/342 (20.8%)	61/355 (17.2%)	52/363 (14.3%)	67/378 (17.7%)	59/355 (16.6%)	69/575 (12.0%)	45/423 (10.6%)	66/503 (13.1%)	59/422 (14.0%)	55/414 (13.3%)	66/471 (14.0%)	33/515 ( 6.4%)	58/379 (15.3%)	62/471 (13.2%)	72/424 (17.0%)	61/422 (14.5%)	52/322 (16.1%)	59/316 (18.7%)	60/366 (16.4%)	47/363 (12.9%)	51/330 (15.5%)	70/388 (18.0%)	47/363 (12.9%)	59/418 (14.1%)	51/366 (13.9%)	64/390 (16.4%)	56/567 ( 9.9%)	72/378 (19.0%)	57/333 (17.1%)	56/347 (16.1%)	75/317 (23.7%)	40/348 (11.5%)	65/690 ( 9.4%)	58/377 (15.4%)
EH136(2)	45/441 (10.2%)	60/387 (15.5%)	64/439 (14.6%)	54/429 (12.6%)	58/414 (14.0%)	55/414 (13.3%)	70/399 (17.5%)	20/618 ( 3.2%)	57/435 (13.1%)	60/417 (14.4%)	75/390 (19.2%)	66/369 (17.9%)	49/441 (11.1%)	64/396 (16.2%)	68/402 (16.9%)	72/363 (19.8%)	56/406 (13.8%)	56/382 (14.7%)	68/434 (15.7%)	46/407 (11.3%)	58/551 (10.5%)	47/429 (11.0%)	41/611 ( 6.7%)	58/398 (14.6%)	50/463 (10.8%)	49/541 ( 9.1%)	38/504 ( 7.5%)	53/391 (13.6%)	64/453 (14.1%)	68/449 (15.1%)	57/382 (14.9%)	51/333 (15.3%)	48/338 (14.2%)	52/414 (12.6%)	29/463 ( 6.3%)	50/322 (15.5%)	69/366 (18.9%)	47/421 (11.2%)	61/425 (14.4%)	34/436 ( 7.8%)	59/387 (15.2%)	34/705 ( 4.8%)	67/378 (17.7%)	52/383 (13.6%)	70/357 (19.6%)	47/356 (13.2%)	57/337 (16.9%)	75/680 (11.0%)	31/437 ( 7.1%)
EH137(2)	95/654 (14.5%)	81/702 (11.5%)	77/708 (10.9%)	15/900 ( 1.7%)	87/642 (13.6%)	74/694 (10.7%)	74/709 (10.4%)	77/781 ( 9.9%)	81/714 (11.3%)	71/696 (10.2%)	85/711 (12.0%)	79/691 (11.4%)	72/690 (10.4%)	82/672 (12.2%)	86/697 (12.3%)	78/651 (12.0%)	67/703 ( 9.5%)	49/743 ( 6.6%)	73/712 (10.3%)	65/700 ( 9.3%)	90/843 (10.7%)	76/702 (10.8%)	113/677 (16.7%)	73/677 (10.8%)	88/682 (12.9%)	93/726 (12.8%)	89/734 (12.1%)	75/649 (11.6%)	93/675 (13.8%)	81/664 (12.2%)	74/677 (10.9%)	51/660 ( 7.7%)	49/674 ( 7.3%)	58/753 ( 7.7%)	69/646 (10.7%)	60/648 ( 9.3%)	72/721 (10.0%)	69/646 (10.7%)	50/795 ( 6.3%)	71/649 (10.9%)	74/662 (11.2%)	127/732 (17.3%)	75/695 (10.8%)	71/674 (10.5%)	59/713 ( 8.3%)	57/709 ( 8.0%)	36/743 ( 4.8%)	107/916 (11.7%)	35/760 ( 4.6%)
EH138(2)	71/485 (14.6%)	89/456 (19.5%)	72/485 (14.8%)	81/463 (17.5%)	91/453 (20.1%)	70/464 (15.1%)	72/439 (16.4%)	18/735 ( 2.4%)	41/586 ( 7.0%)	56/526 (10.6%)	69/506 (13.6%)	61/439 (13.9%)	68/463 (14.7%)	81/434 (18.7%)	72/468 (15.4%)	43/537 ( 8.0%)	63/482 (13.1%)	54/491 (11.0%)	47/583 ( 8.1%)	69/432 (16.0%)	92/566 (16.3%)	47/543 ( 8.7%)	93/542 (17.2%)	48/529 ( 9.1%)	41/606 ( 6.8%)	66/564 (11.7%)	58/540 (10.7%)	56/472 (11.9%)	62/609 (10.2%)	91/480 (19.0%)	41/539 ( 7.6%)	54/397 (13.6%)	64/425 (15.1%)	16/633 ( 2.5%)	60/447 (13.4%)	48/441 (10.9%)	65/484 (13.4%)	60/447 (13.4%)	67/502 (13.3%)	62/443 (14.0%)	75/458 (16.4%)	95/600 (15.8%)	50/540 ( 9.3%)	62/469 (13.2%)	72/461 (15.6%)	31/507 ( 6.1%)	51/448 (11.4%)	55/864 ( 6.4%)	53/437 (12.1%)
EH139(2)	71/508 (14.0%)	80/539 (14.8%)	75/529 (14.2%)	76/509 (14.9%)	70/563 (12.4%)	71/502 (14.1%)	76/498 (15.3%)	39/697 ( 5.6%)	70/539 (13.0%)	73/522 (14.0%)	74/530 (14.0%)	71/496 (14.3%)	69/490 (14.1%)	76/521 (14.6%)	79/517 (15.3%)	73/493 (14.8%)	69/502 (13.7%)	46/549 ( 8.4%)	78/504 (15.5%)	56/496 (11.3%)	125/562 (22.2%)	59/553 (10.7%)	63/659 ( 9.6%)	69/543 (12.7%)	65/541 (12.0%)	82/582 (14.1%)	77/522 (14.8%)	53/542 ( 9.8%)	95/548 (17.3%)	93/525 (17.7%)	69/543 (12.7%)	37/539 ( 6.9%)	50/487 (10.3%)	36/613 ( 5.9%)	43/532 ( 8.1%)	48/485 ( 9.9%)	73/494 (14.8%)	43/532 ( 8.1%)	87/489 (17.8%)	72/465 (15.5%)	71/494 (14.4%)	80/687 (11.6%)	74/503 (14.7%)	66/497 (13.3%)	65/522 (12.5%)	76/499 (15.2%)	40/528 ( 7.6%)	87/714 (12.2%)	47/524 ( 9.0%)
EH140(1)	45/574 ( 7.8%)	5/756 ( 0.7%)	69/511 (13.5%)	61/557 (11.0%)	57/561 (10.2%)	91/486 (18.7%)	62/533 (11.6%)	81/559 (14.5%)	62/552 (11.2%)	59/518 (11.4%)	73/533 (13.7%)	65/534 (12.2%)	72/497 (14.5%)	71/538 (13.2%)	10/755 ( 1.3%)	58/494 (11.7%)	75/486 (15.4%)	55/522 (10.5%)	45/611 ( 7.4%)	36/571 ( 6.3%)	108/582 (18.6%)	57/573 ( 9.9%)	90/548 (16.4%)	22/675 ( 3.3%)	75/528 (14.2%)	35/702 ( 5.0%)	39/670 ( 5.8%)	76/461 (16.5%)	86/529 (16.3%)	75/554 (13.5%)	22/675 ( 3.3%)	47/480 ( 9.8%)	57/496 (11.5%)	70/495 (14.1%)	43/550 ( 7.8%)	48/485 ( 9.9%)	51/583 ( 8.7%)	43/550 ( 7.8%)	72/498 (14.5%)	52/527 ( 9.9%)	81/469 (17.3%)	19/861 ( 2.2%)	75/493 (15.2%)	66/477 (13.8%)	51/535 ( 9.5%)	47/517 ( 9.1%)	34/546 ( 6.2%)	22/976 ( 2.3%)	63/469 (13.4%)
EH141(1)	68/563 (12.1%)	65/607 (10.7%)	54/616 ( 8.8%)	38/614 ( 6.2%)	46/617 ( 7.5%)	69/522 (13.2%)	38/680 ( 5.6%)	155/471 (32.9%)	89/528 (16.9%)	76/524 (14.5%)	53/624 ( 8.5%)	34/655 ( 5.2%)	67/551 (12.2%)	45/609 ( 7.4%)	54/653 ( 8.3%)	35/648 ( 5.4%)	72/555 (13.0%)	69/489 (14.1%)	81/549 (14.8%)	67/503 (13.3%)	104/618 (16.8%)	51/577 ( 8.8%)	102/609 (16.7%)	45/598 ( 7.5%)	68/582 (11.7%)	115/527 (21.8%)	50/665 ( 7.5%)	55/531 (10.4%)	152/471 (32.3%)	56/629 ( 8.9%)	57/570 (10.0%)	34/554 ( 6.1%)	60/521 (11.5%)	52/611 ( 8.5%)	67/517 (13.0%)	24/585 ( 4.1%)	40/653 ( 6.1%)	70/508 (13.8%)	33/684 ( 4.8%)	55/545 (10.1%)	28/682 ( 4.1%)	102/605 (16.9%)	56/550 (10.2%)	50/591 ( 8.5%)	53/566 ( 9.4%)	61/538 (11.3%)	51/480 (10.6%)	62/892 ( 7.0%)	65/505 (12.9%)
EH142(1)	43/534 ( 8.1%)	72/447 (16.1%)	69/453 (15.2%)	19/613 ( 3.1%)	58/476 (12.2%)	62/440 (14.1%)	48/462 (10.4%)	66/567 (11.6%)	67/477 (14.0%)	43/519 ( 8.3%)	36/549 ( 6.6%)	62/441 (14.1%)	61/458 (13.3%)	75/442 (17.0%)	15/664 ( 2.3%)	24/574 ( 4.2%)	74/414 (17.9%)	29/519 ( 5.6%)	72/469 (15.4%)	57/410 (13.9%)	91/571 (15.9%)	33/547 ( 6.0%)	65/596 (10.9%)	63/442 (14.3%)	38/561 ( 6.8%)	29/624 ( 4.6%)	71/468 (15.2%)	63/418 (15.1%)	75/486 (15.4%)	79/489 (16.2%)	13/613 ( 2.1%)	22/476 ( 4.6%)	5/573 ( 0.9%)	55/469 (11.7%)	33/526 ( 6.3%)	52/408 (12.7%)	53/472 (11.2%)	32/526 ( 6.1%)	31/572 ( 5.4%)	36/486 ( 7.4%)	71/449 (15.8%)	85/603 (14.1%)	71/441 (16.1%)	64/388 (16.5%)	60/415 (14.5%)	20/561 ( 3.6%)	45/425 (10.6%)	71/737 ( 9.6%)	51/430 (11.9%)
EH143(1)	84/726 (11.6%)	68/746 ( 9.1%)	88/707 (12.4%)	48/832 ( 5.8%)	49/815 ( 6.0%)	73/707 (10.3%)	72/729 ( 9.9%)	49/902 ( 5.4%)	75/725 (10.3%)	47/834 ( 5.6%)	50/855 ( 5.8%)	72/740 ( 9.7%)	71/715 ( 9.9%)	94/710 (13.2%)	74/746 ( 9.9%)	77/723 (10.7%)	70/708 ( 9.9%)	65/725 ( 9.0%)	70/738 ( 9.5%)	79/697 (11.3%)	36/1050 ( 3.4%)	79/719 (11.0%)	69/835 ( 8.3%)	88/718 (12.3%)	72/750 ( 9.6%)	101/738 (13.7%)	85/765 (11.1%)	80/702 (11.4%)	90/781 (11.5%)	96/717 (13.4%)	89/718 (12.4%)	54/693 ( 7.8%)	62/679 ( 9.1%)	82/725 (11.3%)	60/704 ( 8.5%)	50/708 ( 7.1%)	72/744 ( 9.7%)	61/704 ( 8.7%)	75/714 (10.5%)	69/682 (10.1%)	73/738 ( 9.9%)	113/775 (14.6%)	71/713 (10.0%)	68/706 ( 9.6%)	84/686 (12.2%)	14/876 ( 1.6%)	50/709 ( 7.1%)	112/894 (12.5%)	76/673 (11.3%)
EH144(1)	15/457 ( 3.3%)	44/380 (11.6%)	46/385 (11.9%)	39/404 ( 9.7%)	47/374 (12.6%)	33/419 ( 7.9%)	44/349 (12.6%)	26/538 ( 4.8%)	23/480 ( 4.8%)	48/357 (13.4%)	41/413 ( 9.9%)	25/429 ( 5.8%)	34/419 ( 8.1%)	12/502 ( 2.4%)	24/484 ( 5.0%)	17/439 ( 3.9%)	43/383 (11.2%)	51/321 (15.9%)	34/431 ( 7.9%)	39/322 (12.1%)	18/640 ( 2.8%)	32/402 ( 8.0%)	41/511 ( 8.0%)	45/372 (12.1%)	45/414 (10.9%)	49/434 (11.3%)	56/407 (13.8%)	35/384 ( 9.1%)	43/465 ( 9.2%)	38/470 ( 8.1%)	43/377 (11.4%)	21/349 ( 6.0%)	29/342 ( 8.5%)	22/440 ( 5.0%)	51/322 (15.8%)	35/305 (11.5%)	27/446 ( 6.1%)	51/322 (15.8%)	39/390 (10.0%)	46/343 (13.4%)	46/363 (12.7%)	39/566 ( 6.9%)	31/437 ( 7.1%)	52/353 (14.7%)	51/348 (14.7%)	43/351 (12.3%)	47/287 (16.4%)	36/732 ( 4.9%)	47/315 (14.9%)
EH145(1)	23/549 ( 4.2%)	57/468 (12.2%)	42/541 ( 7.8%)	69/399 (17.3%)	25/583 ( 4.3%)	22/579 ( 3.8%)	36/510 ( 7.1%)	45/566 ( 8.0%)	38/543 ( 7.0%)	58/448 (12.9%)	53/461 (11.5%)	53/450 (11.8%)	21/583 ( 3.6%)	67/410 (16.3%)	57/471 (12.1%)	60/442 (13.6%)	23/583 ( 3.9%)	43/454 ( 9.5%)	47/532 ( 8.8%)	38/439 ( 8.7%)	80/554 (14.4%)	9/619 ( 1.5%)	62/536 (11.6%)	62/443 (14.0%)	59/483 (12.2%)	31/619 ( 5.0%)	58/476 (12.2%)	64/392 (16.3%)	42/564 ( 7.4%)	78/444 (17.6%)	64/443 (14.4%)	46/368 (12.5%)	25/492 ( 5.1%)	76/397 (19.1%)	32/470 ( 6.8%)	47/383 (12.3%)	61/400 (15.2%)	32/470 ( 6.8%)	52/462 (11.3%)	47/424 (11.1%)	58/439 (13.2%)	67/583 (11.5%)	49/453 (10.8%)	15/552 ( 2.7%)	67/390 (17.2%)	48/456 (10.5%)	28/441 ( 6.3%)	91/706 (12.9%)	56/378 (14.8%)
WP_014900537.1	72/386 (18.7%)	58/427 (13.6%)	62/421 (14.7%)	62/381 (16.3%)	54/431 (12.5%)	55/373 (14.7%)	55/410 (13.4%)	39/557 ( 7.0%)	56/443 (12.6%)	27/496 ( 5.4%)	64/406 (15.8%)	55/394 (14.0%)	61/378 (16.1%)	59/420 (14.0%)	59/433 (13.6%)	66/368 (17.9%)	55/393 (14.0%)	180/289 (62.3%)	72/415 (17.3%)	101/305 (33.1%)	46/611 ( 7.5%)	52/399 (13.0%)	61/532 (11.5%)	62/412 (15.0%)	48/477 (10.1%)	37/566 ( 6.5%)	52/488 (10.7%)	74/332 (22.3%)	29/618 ( 4.7%)	74/424 (17.5%)	62/412 (15.0%)	58/338 (17.2%)	53/326 (16.3%)	78/346 (22.5%)	169/281 (60.1%)	55/317 (17.4%)	60/415 (14.5%)	168/281 (59.8%)	23/536 ( 4.3%)	97/286 (33.9%)	57/370 (15.4%)	55/576 ( 9.5%)	62/360 (17.2%)	54/337 (16.0%)	62/365 (17.0%)	57/348 (16.4%)	38/351 (10.8%)	48/740 ( 6.5%)	75/299 (25.1%)
WP_101198885.1	64/377 (17.0%)	67/420 (16.0%)	67/400 (16.8%)	63/389 (16.2%)	60/422 (14.2%)	65/375 (17.3%)	67/366 (18.3%)	53/505 (10.5%)	70/397 (17.6%)	77/375 (20.5%)	75/416 (18.0%)	67/395 (17.0%)	59/386 (15.3%)	63/425 (14.8%)	73/419 (17.4%)	58/379 (15.3%)	64/375 (17.1%)	187/283 (66.1%)	70/382 (18.3%)	97/293 (33.1%)	62/532 (11.7%)	59/376 (15.7%)	62/535 (11.6%)	63/413 (15.3%)	21/553 ( 3.8%)	62/488 (12.7%)	60/419 (14.3%)	75/328 (22.9%)	50/510 ( 9.8%)	70/438 (16.0%)	65/413 (15.7%)	56/308 (18.2%)	62/332 (18.7%)	68/332 (20.5%)	178/276 (64.5%)	56/352 (15.9%)	59/405 (14.6%)	178/276 (64.5%)	69/402 (17.2%)	92/284 (32.4%)	66/386 (17.1%)	69/553 (12.5%)	64/392 (16.3%)	65/369 (17.6%)	61/353 (17.3%)	56/348 (16.1%)	50/329 (15.2%)	67/691 ( 9.7%)	70/300 (23.3%)
WP_069226497.1	65/377 (17.2%)	67/410 (16.3%)	66/393 (16.8%)	63/389 (16.2%)	58/427 (13.6%)	65/375 (17.3%)	67/366 (18.3%)	54/505 (10.7%)	58/434 (13.4%)	77/375 (20.5%)	75/416 (18.0%)	68/395 (17.2%)	60/386 (15.5%)	64/422 (15.2%)	73/419 (17.4%)	59/379 (15.6%)	65/370 (17.6%)	187/283 (66.1%)	71/382 (18.6%)	97/293 (33.1%)	62/532 (11.7%)	59/376 (15.7%)	62/535 (11.6%)	61/403 (15.1%)	21/553 ( 3.8%)	62/488 (12.7%)	60/419 (14.3%)	75/328 (22.9%)	51/510 (10.0%)	68/446 (15.2%)	63/403 (15.6%)	58/313 (18.5%)	62/332 (18.7%)	68/332 (20.5%)	178/276 (64.5%)	58/352 (16.5%)	65/405 (16.0%)	178/276 (64.5%)	69/397 (17.4%)	92/284 (32.4%)	66/386 (17.1%)	67/557 (12.0%)	66/394 (16.8%)	65/369 (17.6%)	61/356 (17.1%)	56/348 (16.1%)	49/329 (14.9%)	65/691 ( 9.4%)	71/300 (23.7%)
AJP48854.1	33/497 ( 6.6%)	63/392 (16.1%)	61/401 (15.2%)	65/384 (16.9%)	58/422 (13.7%)	63/374 (16.8%)	60/412 (14.6%)	56/519 (10.8%)	61/407 (15.0%)	62/380 (16.3%)	67/414 (16.2%)	60/405 (14.8%)	63/376 (16.8%)	36/506 ( 7.1%)	62/447 (13.9%)	67/343 (19.5%)	66/380 (17.4%)	189/283 (66.8%)	68/383 (17.8%)	94/296 (31.8%)	67/537 (12.5%)	67/392 (17.1%)	77/513 (15.0%)	69/404 (17.1%)	62/437 (14.2%)	47/523 ( 9.0%)	58/435 (13.3%)	74/334 (22.2%)	63/498 (12.7%)	73/442 (16.5%)	68/400 (17.0%)	56/309 (18.1%)	63/314 (20.1%)	67/351 (19.1%)	189/276 (68.5%)	56/311 (18.0%)	55/415 (13.3%)	189/276 (68.5%)	67/389 (17.2%)	100/281 (35.6%)	58/384 (15.1%)	74/547 (13.5%)	60/368 (16.3%)	64/350 (18.3%)	62/349 (17.8%)	30/475 ( 6.3%)	47/356 (13.2%)	18/855 ( 2.1%)	76/293 (25.9%)
WP_042877612.1	60/381 (15.7%)	65/418 (15.6%)	63/403 (15.6%)	65/384 (16.9%)	69/412 (16.7%)	59/378 (15.6%)	66/382 (17.3%)	51/504 (10.1%)	54/423 (12.8%)	34/478 ( 7.1%)	75/416 (18.0%)	61/403 (15.1%)	59/373 (15.8%)	63/422 (14.9%)	66/421 (15.7%)	58/387 (15.0%)	64/368 (17.4%)	185/283 (65.4%)	22/530 ( 4.2%)	97/292 (33.2%)	68/533 (12.8%)	63/382 (16.5%)	55/538 (10.2%)	62/411 (15.1%)	22/553 ( 4.0%)	68/486 (14.0%)	53/440 (12.0%)	73/328 (22.3%)	50/516 ( 9.7%)	73/433 (16.9%)	64/411 (15.6%)	60/313 (19.2%)	62/332 (18.7%)	74/390 (19.0%)	178/276 (64.5%)	60/312 (19.2%)	64/408 (15.7%)	178/276 (64.5%)	70/380 (18.4%)	94/282 (33.3%)	64/380 (16.8%)	70/554 (12.6%)	63/394 (16.0%)	50/395 (12.7%)	61/358 (17.0%)	57/344 (16.6%)	49/322 (15.2%)	27/826 ( 3.3%)	67/296 (22.6%)
WP_059541090.1	31/489 ( 6.3%)	54/414 (13.0%)	69/401 (17.2%)	60/382 (15.7%)	56/398 (14.1%)	62/402 (15.4%)	65/405 (16.0%)	54/504 (10.7%)	33/496 ( 6.7%)	70/389 (18.0%)	65/390 (16.7%)	66/371 (17.8%)	62/407 (15.2%)	59/409 (14.4%)	53/440 (12.0%)	63/349 (18.1%)	63/404 (15.6%)	186/283 (65.7%)	67/393 (17.0%)	94/291 (32.3%)	67/530 (12.6%)	67/375 (17.9%)	67/530 (12.6%)	66/387 (17.1%)	51/456 (11.2%)	64/461 (13.9%)	59/438 (13.5%)	75/335 (22.4%)	62/491 (12.6%)	72/429 (16.8%)	67/388 (17.3%)	64/323 (19.8%)	59/329 (17.9%)	69/347 (19.9%)	187/276 (67.8%)	49/364 (13.5%)	52/415 (12.5%)	187/276 (67.8%)	66/374 (17.6%)	99/280 (35.4%)	63/400 (15.8%)	76/546 (13.9%)	64/380 (16.8%)	59/350 (16.9%)	64/348 (18.4%)	59/348 (17.0%)	60/337 (17.8%)	54/726 ( 7.4%)	74/313 (23.6%)
ART39858.1	68/378 (18.0%)	19/555 ( 3.4%)	62/402 (15.4%)	64/388 (16.5%)	57/429 (13.3%)	54/433 (12.5%)	64/421 (15.2%)	51/502 (10.2%)	59/409 (14.4%)	48/434 (11.1%)	69/413 (16.7%)	39/444 ( 8.8%)	58/381 (15.2%)	62/428 (14.5%)	68/430 (15.8%)	58/370 (15.7%)	62/376 (16.5%)	165/287 (57.5%)	74/391 (18.9%)	95/298 (31.9%)	66/547 (12.1%)	45/435 (10.3%)	65/571 (11.4%)	66/395 (16.7%)	64/429 (14.9%)	52/530 ( 9.8%)	66/436 (15.1%)	80/344 (23.3%)	44/535 ( 8.2%)	66/437 (15.1%)	67/395 (17.0%)	54/315 (17.1%)	57/318 (17.9%)	69/355 (19.4%)	172/279 (61.6%)	50/321 (15.6%)	58/419 (13.8%)	172/279 (61.6%)	63/401 (15.7%)	85/285 (29.8%)	20/531 ( 3.8%)	61/577 (10.6%)	67/364 (18.4%)	65/363 (17.9%)	55/378 (14.6%)	61/350 (17.4%)	39/373 (10.5%)	53/748 ( 7.1%)	69/311 (22.2%)
WP_089515094.1	73/360 (20.3%)	63/439 (14.4%)	67/405 (16.5%)	63/402 (15.7%)	67/430 (15.6%)	67/374 (17.9%)	68/382 (17.8%)	52/526 ( 9.9%)	60/434 (13.8%)	74/378 (19.6%)	71/404 (17.6%)	61/403 (15.1%)	69/382 (18.1%)	53/442 (12.0%)	66/434 (15.2%)	65/351 (18.5%)	59/382 (15.4%)	184/283 (65.0%)	69/380 (18.2%)	96/296 (32.4%)	66/547 (12.1%)	65/395 (16.5%)	64/525 (12.2%)	70/374 (18.7%)	56/405 (13.8%)	67/482 (13.9%)	58/449 (12.9%)	74/331 (22.4%)	59/482 (12.2%)	80/440 (18.2%)	71/374 (19.0%)	62/325 (19.1%)	63/328 (19.2%)	68/359 (18.9%)	174/281 (61.9%)	65/314 (20.7%)	63/424 (14.9%)	174/281 (61.9%)	66/397 (16.6%)	103/287 (35.9%)	59/413 (14.3%)	59/599 ( 9.8%)	63/408 (15.4%)	69/339 (20.4%)	64/346 (18.5%)	58/357 (16.2%)	48/356 (13.5%)	70/696 (10.1%)	72/301 (23.9%)
WP_026140314.1	63/364 (17.3%)	61/406 (15.0%)	60/408 (14.7%)	63/390 (16.2%)	58/394 (14.7%)	70/378 (18.5%)	62/377 (16.4%)	61/480 (12.7%)	39/506 ( 7.7%)	71/369 (19.2%)	64/411 (15.6%)	71/375 (18.9%)	73/365 (20.0%)	68/427 (15.9%)	60/418 (14.4%)	57/375 (15.2%)	65/386 (16.8%)	230/284 (81.0%)	69/387 (17.8%)	95/310 (30.6%)	77/530 (14.5%)	15/544 ( 2.8%)	61/553 (11.0%)	59/404 (14.6%)	51/468 (10.9%)	66/483 (13.7%)	49/493 ( 9.9%)	75/329 (22.8%)	64/472 (13.6%)	78/433 (18.0%)	59/404 (14.6%)	49/339 (14.5%)	64/322 (19.9%)	69/322 (21.4%)	183/280 (65.4%)	56/324 (17.3%)	56/414 (13.5%)	183/280 (65.4%)	65/391 (16.6%)	93/286 (32.5%)	61/389 (15.7%)	54/578 ( 9.3%)	61/390 (15.6%)	51/334 (15.3%)	59/352 (16.8%)	59/351 (16.8%)	47/350 (13.4%)	78/670 (11.6%)	71/302 (23.5%)
PHR82761.1	68/375 (18.1%)	21/538 ( 3.9%)	63/413 (15.3%)	56/379 (14.8%)	57/441 (12.9%)	68/383 (17.8%)	57/408 (14.0%)	41/543 ( 7.6%)	29/523 ( 5.5%)	67/397 (16.9%)	71/406 (17.5%)	65/385 (16.9%)	62/387 (16.0%)	63/403 (15.6%)	34/530 ( 6.4%)	55/392 (14.0%)	62/395 (15.7%)	178/287 (62.0%)	58/421 (13.8%)	100/293 (34.1%)	31/653 ( 4.7%)	15/546 ( 2.7%)	61/551 (11.1%)	69/371 (18.6%)	64/416 (15.4%)	57/501 (11.4%)	60/461 (13.0%)	74/333 (22.2%)	60/471 (12.7%)	79/443 (17.8%)	69/371 (18.6%)	60/335 (17.9%)	62/329 (18.8%)	74/342 (21.6%)	181/281 (64.4%)	61/316 (19.3%)	57/420 (13.6%)	181/281 (64.4%)	66/418 (15.8%)	92/287 (32.1%)	67/391 (17.1%)	6/761 ( 0.8%)	63/389 (16.2%)	47/394 (11.9%)	62/355 (17.5%)	27/482 ( 5.6%)	50/358 (14.0%)	78/666 (11.7%)	73/302 (24.2%)
cumD	31/491 ( 6.3%)	22/566 ( 3.9%)	63/396 (15.9%)	67/388 (17.3%)	60/415 (14.5%)	66/377 (17.5%)	19/540 ( 3.5%)	49/531 ( 9.2%)	42/510 ( 8.2%)	32/498 ( 6.4%)	66/405 (16.3%)	16/543 ( 2.9%)	66/377 (17.5%)	36/498 ( 7.2%)	65/422 (15.4%)	58/381 (15.2%)	13/551 ( 2.4%)	273/282 (96.8%)	72/401 (18.0%)	97/316 (30.7%)	74/547 (13.5%)	43/465 ( 9.2%)	69/528 (13.1%)	36/482 ( 7.5%)	61/422 (14.5%)	63/483 (13.0%)	57/458 (12.4%)	81/347 (23.3%)	62/489 (12.7%)	70/422 (16.6%)	36/482 ( 7.5%)	52/360 (14.4%)	70/316 (22.2%)	68/346 (19.7%)	182/283 (64.3%)	54/334 (16.2%)	65/387 (16.8%)	182/283 (64.3%)	64/382 (16.8%)	99/289 (34.3%)	62/398 (15.6%)	68/539 (12.6%)	57/401 (14.2%)	66/339 (19.5%)	61/352 (17.3%)	62/359 (17.3%)	38/371 (10.2%)	79/678 (11.7%)	70/308 (22.7%)
		Training sample Pairwise identity							Predicted top 10 Pairwise identity
		max id	min id	average id					max id	min id	average id
	ART39858.1	68.1	2.4	17.5694					95.2	60.1	75.00
	WP_059541090.1	66.3	2.6	17.8054
	WP_042877612.1	65.5	2.3	17.8776
	WP_101198885.1	61.6	2.3	16.1993
	WP_014900537.1	67	3.3	17.5565					Pairwise sequence identity to the top 15 promiscuous in the training set
	WP_069226497.1	66.3	1.5	17.8939						max id	min id	average id
	WP_089515094.1	64.4	0.8	16.5259					ART39858.1	18	7.1	14.86
	WP_026140314.1	81	2.6	17.2476					WP_059541090.1	18	3.4	13.4
	AJP48854.1	69.2	1.8	17.566					WP_042877612.1	20.5	10.7	16.24
	PHR82761.1	63	2	16.3122					WP_101198885.1	16.9	6.6	14.05
	cumD	96.8	1.9	16.7898					WP_014900537.1	20.3	9.9	15.96
		67.24	2.16	17.2554					WP_069226497.1	20.5	10.5	16.45
									WP_089515094.1	18	6.3	13.94
									WP_026140314.1	18.1	3.9	13.28
									AJP48854.1	20	7.7	15.81
									PHR82761.1	18.7	5.4	13.49
									cumD	17.5	2.9	10.8
										18.9	7.15	14.748
[truncated: 109 more columns]

## Sheet: Table S6 Quality of the models
	ID	NCBI Reference Sequence	Z-Score Alphafold 2.0	Z-Score Modeller	RMSD between Structures
sid|181416	mCPHPsp	WP_101198885.1	-9.57	-9.54	0.561574
sid|176070	mCPHBd1	WP_069226497.1	-9.58	-9.68	0.390317
sid|178198	mCPHRa	AJP48854.1	*	-9.97
sid|182621	mCPHCn	WP_042877612.1	-9.74	-9.79	0.405571
sid|171139	mCPHBd2	WP_059541090.1	-9.79	-9.69	0.4055
sid|181104	mCPHUb	ART39858.1	-10.27	-10.13	0.364468
sid|183201	mCPHPc	WP_089515094.1	-9.89	-9.77	0.484909
sid|182795	mCPHPv	WP_026140314.1	-9.52	-9.54	0.334983
sid|12870	mCPHCsp	PHR82761.1	-10.05	-10.14	0.483668
sid|180273	mCPHBc	WP_014900537.1	*	-9.73
* Alphafold Model not available.

## Sheet: Table S7 Structural RMSD 
	WP_089515094.1	ART39858.1	AJP48854.1	WP_042877612.1	WP_026140314.1	PHR82761.1	WP_014900537.1	WP_059541090.1	WP_069226497.1	WP_101198885.1	promis
CalB(68)	2.908	2.855	2.819	2.994	2.943	2.855	3.085	2.885	2.894	2.781	P
CalA(36)	3.889	3.763	3.737	3.759	3.763	3.748	3.729	3.768	3.778	3.804	P
EH1(72)	2.925	3.012	2.906	3.061	3	2.994	2.997	2.982	2.99	2.938	P
EH2(71)	2.875	2.983	2.826	2.914	2.918	2.886	2.955	2.888	2.913	2.895	P
EH3(69)	3.185	3.18	3.14	3.276	3.243	3.319	3.234	3.198	3.255	3.181	P
EH4(67)	2.887	2.993	2.838	2.92	2.911	2.907	2.958	2.9	2.921	2.871	P
EH5(67)	2.916	2.905	2.899	2.947	2.992	2.927	2.951	2.963	2.931	2.941	P
EH6(66)	2.963	2.829	3.002	2.901	2.891	2.955	2.913	2.949	2.876	2.928	P
EH7(64)	5.157	3.966	5.674	3.958	3.856	4.325	3.812	3.802	5.121	5.2	P
EH8(63)	3.083	3.023	3.1	3.138	3.071	2.986	3.061	2.874	3.15	3.04	P
EH9(61)	2.874	2.863	2.843	2.881	3.096	2.883	2.88	2.912	2.853	2.866	P
EH10(58)	2.99	3.003	2.749	3.033	3.019	3.08	3.005	2.953	2.964	2.952	P
EH11(53)	2.786	2.987	2.862	2.917	2.88	2.78	2.767	2.883	2.756	2.797	P
EH12(51)	2.893	2.951	2.89	2.958	2.972	2.88	2.894	2.941	2.925	2.91	P
EH14(48)	2.974	3.046	2.949	3.078	3	3.047	3.175	3.108	2.957	2.982	P
EH15(42)	2.852	3.029	2.933	2.906	2.869	3.038	2.896	2.901	2.865	2.863	N
EH16(42)	3.733	2.943	2.943	3.012	2.979	3.008	3.061	2.905	3.025	3.735	N
EH17(39)	0.257	0.242	0.249	0.243	0.24	0.248	0.583	0.24	0.246	0.266	N
EH18(38)	3.324	3.255	3.297	3.171	3.176	3.303	3.196	3.145	3.201	3.101	N
EH19(37)	1.774	1.803	1.809	1.787	1.803	1.814	1.776	1.818	1.78	1.808	N
EH20(37)	3.318	3.389	3.459	3.561	3.506	3.43	3.562	3.561	3.288	3.48	N
EH21(36)	2.949	2.92	2.811	2.858	2.9	2.981	2.878	2.927	2.963	2.871	N
EH22(35)	2.823	2.934	2.956	2.963	2.897	2.989	2.897	2.904	2.778	2.837	N
EH23(34)	2.976	3.386	3.022	2.93	3.031	3.383	2.98	3.023	3.015	2.962	N
EH24(34)	5.457	5.777	5.513	5.537	5.535	5.608	5.074	5.562	5.681	5.634	N
EH25(33)	3.159	3.274	3.17	3.245	3.335	3.346	3.296	3.279	3.179	3.246	N
EH26(32)	2.965	2.949	2.911	2.914	2.962	2.929	2.949	2.958	2.91	2.965	N
EH27(32)	5.106	5.252	5.062	5.175	4.932	5.308	5.127	5.171	5.453	5.043	N
EH28(31)	2.902	2.87	2.876	2.998	2.939	2.895	3.007	2.898	2.829	2.897	N
EH29(31)	2.816	2.938	2.889	2.839	2.892	2.986	2.893	2.876	2.766	2.83	N
EH30(30)	2.223	2.238	2.246	2.253	2.249	2.248	2.245	2.227	2.23	2.325	N
EH31(29)	2.647	2.563	2.716	2.679	2.714	2.75	2.733	2.683	2.663	2.592	N
EH32(29)	3.025	3.092	2.788	3.086	3.063	3.091	3.064	3.33	2.817	2.926	N
EH33(29)	0.38	0.389	0.392	0.395	0.394	0.395	0.508	0.392	0.396	0.381	N
EH34(29)	2.678	2.575	2.599	2.494	2.618	2.605	2.433	2.418	2.685	2.687	N
EH35(29)	2.817	2.881	2.867	2.883	2.875	2.907	2.937	2.945	2.904	2.845	N
EH36(28)	0.386	0.395	0.398	0.401	0.401	0.402	0.513	0.397	0.402	0.386	N
EH37(28)	2.887	2.913	2.959	3.025	2.974	2.954	3.082	3.014	2.879	2.847	N
EH38(28)	1.826	1.783	1.815	1.767	1.769	1.796	1.821	1.787	1.826	1.757	N
EH39(28)	3.056	3.116	3.209	3.145	2.986	3.141	3.178	3.141	3.117	3.121	N
EH40(27)	2.617	2.602	2.583	2.515	2.452	2.601	2.525	2.609	2.502	2.463	N
EH41(27)	2.91	3.065	3.051	2.919	2.949	2.957	2.954	3.01	2.952	2.921	N
EH42(27)	3.061	3.124	3.004	2.957	3.022	3.127	3.023	3.054	3.07	3.049	N
EH43(27)	3.095	3.245	3.2	3.247	3.099	3.264	3.27	3.184	3.053	3.121	N
EH44(25)	3.083	3.115	3.098	2.989	3.033	3.122	3.073	3.109	3.042	2.951	N
EH45(24)	2.5	2.489	2.363	2.271	2.403	2.434	2.405	2.322	2.534	2.527	N
EH46(23)	3.955	3.884	3.895	3.783	3.793	3.932	3.791	3.783	3.912	3.964	N
EH47(23)	2.573	2.649	2.641	2.516	2.572	2.606	2.567	2.578	2.572	2.556	N
EH48(23)	3.887	3.079	3.185	3.134	3.077	3.071	3.067	3.027	3.866	3.823	N
EH49(23)	2.485	2.505	2.688	2.378	2.787	2.461	2.689	2.717	2.447	2.514	N
EH50(22)	1.81	1.845	1.77	1.821	1.885	1.839	1.862	1.783	1.863	1.739	N
EH51(22)	3.929	4.219	4.208	4.071	3.997	4.192	4.1	4.731	3.936	4.119	N
EH52(21)	3.201	3.108	3.204	3.162	3.11	3.13	3.183	3.121	3.177	3.147	N
EH53(21)	2.821	2.94	3.027	3.036	3.092	3.021	3.034	3.079	2.825	2.811	N
EH54(21)	2.799	2.732	2.951	2.753	2.85	2.877	2.942	2.878	2.833	2.985	N
EH55(21)	2.418	2.436	2.402	2.437	2.408	2.445	2.458	2.404	2.431	2.41	N
EH56(21)	2.149	2.212	2.161	2.204	2.181	2.206	2.186	2.171	2.177	2.189	N
EH57(21)	3.262	3.004	3.277	3.053	2.995	2.961	2.994	2.941	3.26	3.26	N
EH58(21)	2.912	2.923	2.937	2.927	2.931	2.934	2.939	2.901	2.92	2.901	N
EH59(21)	2.586	2.767	2.548	2.771	2.617	2.67	2.605	2.785	2.621	2.672	N
EH60(21)	1.447	1.495	1.489	1.473	1.482	1.475	1.362	1.392	1.402	1.421	N
EH61(20)	3.408	3.471	3.437	3.179	3.203	3.633	3.26	3.169	3.322	2.886	N
EH62(20)	1.709	1.684	1.638	1.712	1.67	1.586	1.668	1.67	1.67	1.683	N
EH63(20)	0.42	0.435	0.42	0.426	0.426	0.433	0.36	0.288	0.291	0.316	N
EH64(20)	3.631	3.281	3.687	3.412	3.452	3.361	2.947	3.305	3.6	3.671	N
EH65(20)	2.214	2.223	2.203	2.227	2.2	2.219	2.21	2.218	2.201	2.247	N
EH66(19)	2.582	2.558	2.55	2.582	2.545	2.533	2.566	2.563	2.565	2.572	N
EH67(18)	2.958	3.095	3.185	3.118	3.033	3.129	3.126	3.1	2.993	2.941	N
EH68(18)	2.859	2.866	2.919	2.828	2.922	2.914	2.921	2.852	2.827	2.826	N
EH69(18)	5.417	4.975	4.759	5.534	4.872	4.978	5.234	5.127	5.631	4.037	N
EH70(18)	3.303	3.257	3.387	3.215	3.183	3.331	3.254	3.207	3.337	3.279	N
EH71(18)	2.799	2.914	2.713	2.868	2.71	2.867	2.958	2.799	2.915	2.766	N
EH72(18)	3.25	3.293	3.268	3.303	3.235	3.239	3.238	3.343	3.49	3.483	N
EH73(17)	4.972	5.053	4.16	4.8	4.441	4.053	4.587	4.999	4.962	4.412	N
EH74(17)	2.56	2.507	2.542	2.534	2.564	2.545	2.566	2.528	2.575	2.533	N
EH76(16)	2.405	2.402	2.446	2.303	2.441	2.445	2.372	2.45	2.336	2.427	N
EH77(16)	2.866	3.082	3.028	3.104	3.07	3.053	3.09	3.078	2.898	2.892	N
EH78(15)	5.404	3.984	5.211	4.967	5.126	3.982	5.382	5.361	5.12	5.12	N
EH79(14)	2.89	2.857	3.136	2.821	2.917	2.848	2.996	2.88	2.932	2.882	N
EH80(14)	3.641	3.421	3.41	3.551	3.518	3.559	3.564	3.501	3.64	3.647	N
EH81(14)	2.295	2.289	2.259	2.247	2.243	2.271	2.289	2.262	2.275	2.301	N
EH82(14)	2.392	2.521	2.497	2.6	2.568	2.492	2.632	2.621	2.417	2.476	N
EH83(14)	2.551	2.661	2.653	2.596	2.622	2.598	2.621	2.592	2.592	2.584	N
EH84(13)	3.439	3.525	3.405	3.249	3.37	3.262	3.346	3.278	3.375	3.418	N
EH85(13)	2.419	2.473	2.545	2.577	2.715	2.426	2.644	2.573	2.616	2.579	N
EH86(13)	3.248	3.127	3.125	3.131	3.118	3.177	3.079	3.076	3.104	3.048	N
EH87(13)	3.143	3.049	3.228	3.108	3.093	3.068	3.042	3.068	3.137	3.118	N
EH88(13)	4.516	4.501	4.903	4.423	4.582	4.598	4.602	4.502	4.593	4.266	N
EH89(13)	5.253	0.412	5.379	0.581	0.55	0.384	0.579	0.495	5.099	5.196	N
EH90(13)	3.077	2.935	2.997	3.07	2.999	2.993	3.071	2.996	2.913	2.901	N
EH91(13)	3.242	3.23	3.231	3.24	3.366	3.245	3.264	3.363	3.278	3.244	N
EH92(12)	2.241	2.258	2.265	2.252	2.259	2.261	2.277	2.269	2.246	2.25	N
EH93(12)	3.496	2.906	3.62	3.259	3.345	2.938	3.241	3.356	3.522	3.491	N
EH94(12)	2.938	3.169	2.961	3.486	3.461	3.116	3.05	3.086	2.911	3.063	N
EH95(11)	5.011	4.833	5.048	4.955	4.909	5.053	4.985	4.96	4.439	4.449	N
EH96(11)	2.693	3.069	2.821	3.025	2.897	2.924	3.042	2.96	2.71	2.705	N
EH97(11)	3.681	3.625	3.619	3.943	3.471	3.557	3.796	3.768	3.7	3.646	N
EH98(11)	4.173	4.564	4.226	3.902	4.109	4.021	3.964	4.057	3.996	3.965	N
EH99(11)	3.048	3.148	3.091	3.05	3.151	3.156	3.081	3.089	3.053	3.11	N
EH100(11)	3.084	2.984	3.112	3.051	2.971	3.06	3.098	2.896	3.106	3.073	N
EH101(11)	2.793	2.768	2.786	2.809	2.775	2.962	2.619	2.716	2.79	2.784	N
EH102(10)	4.496	4.363	4.528	4.499	4.554	4.35	4.447	4.556	4.497	4.446	N
EH103(10)	2.371	2.607	2.4	2.473	2.524	2.507	2.389	2.512	2.528	2.491	N
EH104(10)	1.995	2.135	2.079	2.059	2.019	2.134	2.051	2.085	2.019	2.014	N
EH105(10)	4.851	2.31	5.694	2.328	4.468	2.841	2.876	4.335	4.733	4.963	N
EH106(9)	4.335	5.322	3.688	5.163	4.315	4.516	2.734	5.177	3.707	3.704	N
EH107(9)	2.259	2.258	2.27	2.263	2.266	2.269	2.238	2.226	2.234	2.211	N
EH108(9)	2.938	2.939	2.919	3.01	2.908	2.939	2.953	2.91	2.934	2.943	N
EH109(9)	2.351	2.297	2.579	2.273	2.46	2.369	2.229	2.247	2.228	2.386	N
EH110(8)	4.854	4.755	4.937	4.772	4.482	4.696	4.736	4.877	4.772	4.828	N
EH111(8)	3.167	3.153	3.33	3.009	3.122	3.187	3.152	3.116	3.178	3.181	N
EH112(8)	3.598	3.585	3.486	3.498	3.697	3.571	3.538	3.539	3.588	3.521	N
EH113(8)	2.934	3.26	3.21	2.967	2.957	3.065	3.026	2.959	2.978	2.94	N
EH114(8)	2.197	2.239	2.287	2.27	2.298	2.25	2.289	2.247	2.266	2.228	N
EH115(8)	2.724	2.984	2.588	2.752	2.599	2.925	2.662	2.746	2.638	2.553	N
EH116(7)	3.351	3.321	3.44	3.467	3.216	3.489	3.275	3.321	3.355	3.355	N
EH117(6)	5.495	3.694	4.601	3.224	3.569	3.279	3.14	3.253	5.359	5.236	N
EH118(6)	2.862	2.763	2.827	2.787	2.798	2.796	2.756	2.79	2.825	2.852	N
EH119(6)	3.452	3.526	3.41	3.476	3.483	3.465	3.503	3.521	3.44	3.364	N
EH120(5)	3.08	3.057	2.843	3.085	2.865	3.043	3.035	2.989	3.096	2.873	N
EH121(5)	3.274	3.089	3.354	1.534	3.133	1.523	3.131	1.526	3.146	3.143	N
EH123(4)	2.34	2.318	2.619	2.303	2.358	2.236	2.206	2.551	2.216	2.273	N
EH124(4)	5.249	4.912	5.173	5.142	5.224	5.137	5.225	5.22	5.22	4.572	N
EH125(4)	3.066	3.213	3.323	3.181	3.08	3.143	3.215	3.186	3.102	3.088	N
EH126(4)	3.258	3.556	3.139	3.174	3.075	3.134	3.153	3.14	3.186	3.197	N
EH127(4)	2.838	2.724	2.875	2.703	2.617	2.702	2.706	2.733	2.784	2.667	N
EH128(4)	2.227	2.312	2.232	2.283	2.247	2.267	2.276	2.237	2.271	2.249	N
EH129(3)	4.992	5.447	5.055	5.555	5.212	5.275	4.889	5.571	5.074	5.003	N
EH130(2)	3.385	3.163	3.221	3.218	3.466	3.196	3.104	3.243	3.18	3.325	N
EH131(2)	3.145	3.007	3.279	3.134	3.247	2.949	3.052	3.138	3.076	3.09	N
EH132(2)	2.876	2.87	2.845	2.916	2.82	2.849	2.929	2.82	2.874	2.81	N
EH133(2)	5.104	1.543	4.698	1.512	1.539	1.512	3.486	1.556	5.067	5.129	N
EH134(2)	3.319	3.182	3.266	3.281	2.766	2.978	3.307	2.864	3.267	3.247	N
EH135(2)	3.062	3.376	3.117	3.15	3.138	3.039	3.13	3.121	3.109	3.103	N
EH136(2)	4.305	4.407	4.281	4.156	4.192	4.364	4.229	4.219	4.298	4.159	N
EH137(2)	2.896	3.271	2.823	2.839	2.932	3.106	2.89	2.953	2.966	2.921	N
EH138(2)	4.542	4.543	3.577	4.568	4.618	4.533	4.572	4.576	4.431	4.577	N
EH139(2)	3.657	3.481	3.69	3.708	3.994	3.603	3.898	3.392	3.667	3.695	N
EH140(1)	4.834	4.381	5.064	4.459	4.485	4.412	4.385	4.435	5.105	5.074	N
EH141(1)	5.172	3.494	5.359	3.504	3.494	3.501	3.436	3.506	5.274	4.844	N
EH142(1)	3.394	3.245	3.435	3.211	3.39	3.227	3.348	3.298	3.501	3.639	N
EH143(1)	4.514	4.476	4.401	4.503	4.452	4.024	4.413	4.275	4.454	4.481	N
EH144(1)	3.807	4.221	4.141	4.595	4.234	4.172	4.279	4.38	4.61	4.505	N
EH145(1)	3.375	3.349	3.495	3.635	3.451	3.334	3.513	3.508	3.29	3.467	N
